# Supplementary material for: Multicomponent reactions for facile access to coumarin-fused dihydroquinolines and quinolines: synthesis and photophysical studies
Source: Royal Society of Chemistry journal article supplement (doi:10.1039/c4nj00630e), 2014-01-01
Supplement: c4nj00630e1.pdf [file c4nj00630e1.pdf]

## Supporting Information

### Multicomponent reactions (MCRs) for the facile access of coumarin fused dihydroquinolines and quinolines : Synthesis and photophysical studies

*Mohammed Nasim Khan, Suman Pal, Shaik Karamthulla and Lokman H. Choudhury\**  
*Department of Chemistry, Indian Institute of Technology Patna, Bihar-800 013, India*

Corresponding author's E-mail: [lokman@iitp.ac.in](mailto:lokman@iitp.ac.in), Tel.: +91 612 2552038; Fax: +91 612 2277383

## Table of Contents

|                                                                                                                                                                                                    |         |
|----------------------------------------------------------------------------------------------------------------------------------------------------------------------------------------------------|---------|
| Experimental general                                                                                                                                                                               | 2S      |
| Characterization                                                                                                                                                                                   | 3S-14S  |
| Copies of <sup>1</sup> H and <sup>13</sup> C NMR spectra of all Compounds                                                                                                                          | 15S-43S |
| Fluorescence quantum yield of CFDQ ( <b>4a-4s</b> ) and CFQ ( <b>5e, 5h, 5j, 5l, 5m, 5n</b> and <b>5q</b> ) in different solvents and equation used for the fluorescence quantum yield calculation | 44S-45S |

## Experimental

### General

All reagents were used without further purification and procured from the commercial sources. Microwave irradiation was carried out with Initiator 2.5 Microwave Synthesizers from Biotage, Uppsala, Sweden. Shimadzu FTIR spectrophotometer was used for recording IR spectra.  $^1\text{H}$  NMR and  $^{13}\text{C}$  NMR spectra were recorded on a Jeol 500, Varian 400 and Bruker 300/400/500 MHz spectrometers in  $\text{CDCl}_3$  and  $\text{DMSO-}d_6$  using TMS as internal reference. Elemental analyses were carried out in a Perkin Elmer 2400 automatic CHN analyzer or Elementer Vario EL III. X-ray crystallographic analysis was performed with a Siemens SMART CCD and a Siemens P4 diffractometer. All compounds were characterized by their melting points,  $^1\text{H}$  NMR and  $^{13}\text{C}$  NMR spectra and elemental analysis. The UV-Vis absorption spectra were recorded on Shimadzu UV-Vis spectrophotometer UV-2550 and fluorescence spectra was recorded at Horiba Jobin Yuon fluoromax-4 spectrofluorometer.

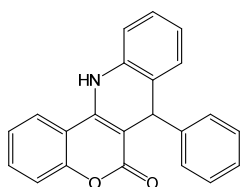

7-phenyl-7,12-dihydro-6*H*-chromeno[4,3-*b*]quinolin-6-one (**4a**): White solid; Yield: 82%, m.p. 234-236 °C; IR (KBr): 3312, 3065, 3021, 2918, 1659, 1618, 1528, 1482, 1444, 1389, 1257, 1055 cm<sup>-1</sup>; <sup>1</sup>H NMR (400 MHz, DMSO-*d*<sub>6</sub> + CDCl<sub>3</sub>) δ (ppm) : 9.73 (s, 1H, NH), 8.27 (s, 1H, Ar-H), 7.51-6.61 (m, 12H, Ar-H), 5.18 (s, 1H, -CH-); <sup>13</sup>C NMR (100 MHz, DMSO-*d*<sub>6</sub> + CDCl<sub>3</sub>) δ (ppm): 160.5, 152.3, 147.3, 143.7, 135.5, 131.3, 129.2, 128.1, 127.1, 126.0, 124.2, 123.5, 123.4, 122.7, 116.6, 116.2, 113.5, 96.4, 41.1; Anal. calcd. for C<sub>22</sub>H<sub>15</sub>NO<sub>2</sub>: C, 81.21; H, 4.65; N, 4.30 %. Found: C, 81.24; H, 4.67; N, 4.36 %.

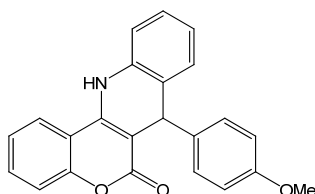

7-(4-methoxyphenyl)-7,12-dihydro-6*H*-chromeno[4,3-*b*]quinolin-6-one (**4b**): White solid; Yield: 89%, m.p. 236-238 °C; IR (KBr): 3323, 3077, 2923, 2830, 1657, 1621, 1529, 1488, 1447, 1376, 1258, 1176, 1038 cm<sup>-1</sup>; <sup>1</sup>H NMR (400 MHz, DMSO-*d*<sub>6</sub>) δ (ppm) : 9.93 (s, 1H, NH), 8.35 (dd, *J* = 8.2, 1.2 Hz, 1H, Ar-H), 7.65 (t, *J* = 8.3 Hz, 1H, Ar-H), 7.46 (t, *J* = 8.1 Hz, 1H, Ar-H), 7.43-7.36 (m, 4H, Ar-H), 7.25-7.21 (m, 4H, Ar-H), 6.98 (t, *J* = 7.8 Hz, 1H, Ar-H), 5.27 (s, 1H, -CH-), 3.69 (s, 3H, -OCH<sub>3</sub>); <sup>13</sup>C NMR (100 MHz, DMSO-*d*<sub>6</sub>) δ (ppm) : 160.4, 152.3, 146.7, 143.8, 135.4, 131.9, 131.2, 129.4, 129.3, 127.6, 123.9, 123.7, 123.6, 122.8, 119.3, 116.9, 116.4, 113.3, 95.8, 56.7, 40.3; Anal. calcd. for C<sub>23</sub>H<sub>17</sub>NO<sub>3</sub>: C, 77.73; H, 4.82; N, 3.94 %. Found: C, 77.75; H, 4.84; N, 3.98 %.

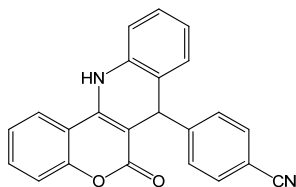

4-(6-oxo-7,12-dihydro-6*H*-chromeno[4,3-*b*]quinolin-7-yl)benzotrile (**4c**): Light yellow solid; Yield: 87%, m.p. 306-308 °C; IR (KBr): 3313, 3077, 2923, 2235, 1661, 1617, 1530, 1483, 1444, 1253, 1059 cm<sup>-1</sup>; <sup>1</sup>H NMR (400 MHz, DMSO-*d*<sub>6</sub>) δ (ppm) : 9.97 (s, 1H, NH), 8.36 (dd, *J* = 8.1, 1.1 Hz, 1H, Ar-H), 7.70 (d, *J* = 8.3 Hz, 2H, Ar-H), 7.68-7.63 (m, 1H, Ar-H), 7.49-7.47 (m, 1H, Ar-H), 7.46 (d, *J* = 8.3 Hz, 2H, Ar-H), 7.38 (d, *J* = 8.4 Hz, 2H, Ar-H), 7.25-7.21 (m, 2H, Ar-H), 7.00 (t, *J* = 8.5 Hz, 1H,

Ar-H), 5.39 (s, 1H, CH);  $^{13}\text{C}$  NMR (100 MHz, DMSO- $d_6$ )  $\delta$  (ppm) : 160.4, 152.5, 152.3, 144.1, 135.4, 132.4, 132.0, 129.5, 128.2, 127.9, 124.0, 123.8, 123.0, 122.9, 118.8, 116.9, 116.5, 113.3, 109.1, 95.3, 41.1; Anal. calcd. for  $\text{C}_{23}\text{H}_{14}\text{N}_2\text{O}_2$ : C, 78.84; H, 4.03; N, 8.00 %. Found: C, 78.87; H, 4.06; N, 8.05 %.

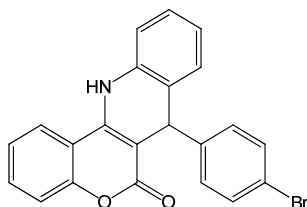

7-(4-bromophenyl)-7,12-dihydro-6H-chromeno[4,3-b]quinolin-6-one (**4d**): White solid; Yield: 90%, m.p. 293-295  $^{\circ}\text{C}$ ; IR (KBr): 3324, 3051, 2929, 1665, 1618, 1529, 1482, 1449, 1392, 1294, 1256, 1058, 1016  $\text{cm}^{-1}$ ;  $^1\text{H}$  NMR (400 MHz, DMSO- $d_6$ )  $\delta$  (ppm) : 9.92 (s, 1H, NH), 8.35 (dd,  $J = 8.1, 1.1$  Hz, 1H, Ar-H), 7.65 (t,  $J = 8.4$  Hz, 1H, Ar-H), 7.46 (t,  $J = 8.2$  Hz, 1H, Ar-H), 7.42-7.35 (m, 4H, Ar-H), 7.24-7.20 (m, 4H, Ar-H), 6.99 (t,  $J = 7.7$  Hz, 1H, Ar-H), 5.27 (s, 1H, CH);  $^{13}\text{C}$  NMR (100 MHz, DMSO- $d_6$ )  $\delta$  (ppm) : 160.4, 152.3, 146.7, 143.8, 135.4, 131.9, 131.2, 129.4, 129.3, 127.6, 123.9, 123.8, 123.7, 122.8, 119.3, 116.9, 116.4, 113.3, 95.8, 40.4; Anal. calcd. for  $\text{C}_{22}\text{H}_{14}\text{BrNO}_2$ : C, 65.36; H, 3.49; N, 3.46 %. Found: C, 65.37; H, 3.52; N, 3.49 %.

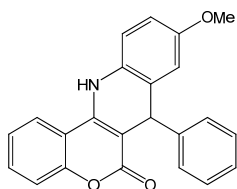

9-methoxy-7-phenyl-7,12-dihydro-6H-chromeno[4,3-b]quinolin-6-one (**4e**): Light yellow solid; Yield: 87%, m.p. 294-296  $^{\circ}\text{C}$ ; IR (KBr): 3312, 3065, 2988, 2915, 2831, 1660, 1612, 1532, 1502, 1316, 1240, 1205, 1052  $\text{cm}^{-1}$ ;  $^1\text{H}$  NMR (400 MHz, DMSO- $d_6$  +  $\text{CDCl}_3$ )  $\delta$  (ppm): 9.80 (s, 1H, NH), 8.30 (d,  $J = 8.0$  Hz, 1H, Ar-H), 7.60 (t,  $J = 7.7$  Hz, 1H, Ar-H), 7.41 (t,  $J = 7.7$  Hz, 1H, Ar-H), 7.33-7.29 (m, 2H, Ar-H), 7.26-7.18 (m, 4H, Ar-H), 7.10 (t, 1H, Ar-H), 6.81-6.77 (m, 2H, Ar-H), 5.23 (s, 1H, -CH-), 3.67 (s, 3H, - $\text{OCH}_3$ );  $^{13}\text{C}$  NMR (100 MHz, DMSO  $d_6$  +  $\text{CDCl}_3$ )  $\delta$  (ppm): 160.5, 155.8, 152.2, 147.3, 143.5, 131.5, 129.0, 128.2, 127.0, 126.1, 125.5, 123.5, 122.6, 117.3, 116.8, 114.0, 113.5, 113.1, 94.9, 55.1, 41.3; Anal. calcd. for  $\text{C}_{23}\text{H}_{17}\text{NO}_3$ : C, 77.73; H, 4.82; N, 3.94%. Found: C, 77.75; H, 4.85; N, 3.97%.

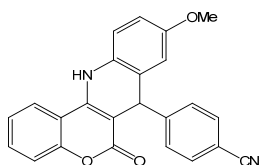

4-(9-methoxy-6-oxo-7,12-dihydro-6H-chromeno[4,3-b]quinolin-7-yl)benzonitrile (**4f**): White solid; Yield: 88%, m.p. 300-302 °C; IR (KBr): 3300, 3034, 2997, 2934, 2902, 2835, 2232, 1656, 1613, 1534, 1499, 1394, 1247, 1207, 1127, 1058  $\text{cm}^{-1}$ ;  $^1\text{H}$  NMR (400 MHz,  $\text{DMSO-}d_6 + \text{CDCl}_3$ )  $\delta$  (ppm): 9.87 (s, 1H, NH), 8.28 (dd,  $J = 8.1, 1.1$  Hz, 1H, Ar-H), 7.65 (d,  $J = 8.3$  Hz, 2H, Ar-H), 7.62-7.58 (m, 1H, Ar-H), 7.46 (d,  $J = 8.3$  Hz, 2H, Ar-H), 7.43-7.39 (m, 1H, Ar-H), 7.35-7.30 (m, 2H, Ar-H), 6.82 (dd,  $J = 8.8, 2.8$  Hz, 1H, Ar-H), 6.75 (d,  $J = 2.7$  Hz, 1H, Ar-H), 5.36 (s, 1H, -CH-), 3.68 (s, 3H, -OCH<sub>3</sub>);  $^{13}\text{C}$  NMR (100 MHz,  $\text{DMSO-}d_6 + \text{CDCl}_3$ )  $\delta$  (ppm): 160.5, 155.9, 152.3, 152.2, 143.8, 132.2, 131.5, 128.9, 128.2, 124.1, 123.5, 122.7, 118.6, 117.6, 116.7, 114.0, 113.6, 113.4, 109.2, 93.9, 55.1, 41.5; Anal. calcd. for  $\text{C}_{24}\text{H}_{16}\text{N}_2\text{O}_3$ : C, 75.78; H, 4.24; N, 7.36 %. Found: C, 75.79; H, 4.27; N, 7.38%.

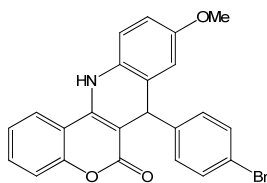

7-(4-bromophenyl)-9-methoxy-7,12-dihydro-6H-chromeno[4,3-b]quinolin-6-one (**4g**): White solid; Yield: 89%, m.p. 298-300 °C; IR (KBr): 3309, 3062, 3000, 2959, 2910, 2829, 1659, 1611, 1533, 1506, 1482, 1317, 1239, 1206, 1053  $\text{cm}^{-1}$ ;  $^1\text{H}$  NMR (400 MHz,  $\text{DMSO-}d_6 + \text{CDCl}_3$ )  $\delta$  (ppm): 9.78 (s, 1H, NH), 8.29 (dd,  $J = 7.9, 0.7$  Hz, 1H, Ar-H), 7.56 (dt,  $J = 8.3, 1.1$  Hz, 1H, Ar-H), 7.39-7.27 (m, 3H+2H, Ar-H), 7.21 (d,  $J = 8.4$ , 2H, Ar-H), 6.78 (dd,  $J = 8.7, 2.7$  Hz, 1H, Ar-H), 6.71 (d,  $J = 2.7$ , 1H, Ar-H), 5.24 (s, 1H, -CH-), 3.68 (s, 3H, -OCH<sub>3</sub>);  $^{13}\text{C}$  NMR (100 MHz,  $\text{DMSO-}d_6 + \text{CDCl}_3$ )  $\delta$  (ppm): 160.6, 155.8, 152.2, 146.4, 143.5, 131.3, 131.0, 129.3, 128.9, 124.7, 123.3, 122.6, 119.4, 117.4, 116.6, 113.8, 113.5, 113.3, 94.5, 55.0, 40.9; Anal. calcd. for  $\text{C}_{23}\text{H}_{16}\text{BrNO}_3$ : C, 63.61; H, 3.71; N, 3.23 %. Found: C, 63.64; H, 3.74; N, 3.28%.

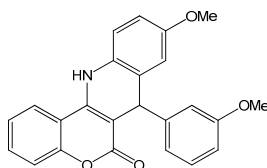

9-methoxy-7-(3-methoxyphenyl)-7,12-dihydro-6H-chromeno[4,3-b]quinolin-6-one (**4h**): White solid; Yield: 88%, m.p. 273-275 °C; IR (KBr): 3309, 3053, 3000, 2950, 2911, 2834, 1738, 1652, 1616,

1529, 1503, 1488, 1411, 1243, 1227, 1176  $\text{cm}^{-1}$ ;  $^1\text{H}$  NMR (400 MHz,  $\text{DMSO-}d_6 + \text{CDCl}_3$ )  $\delta$  (ppm): 9.78 (s, 1H, NH), 8.29 (dd,  $J = 8.1, 1.2$  Hz, 1H, Ar-H), 7.56 (t,  $J = 7.7$  Hz, 1H, Ar-H), 7.39 (t,  $J = 7.6$  Hz, 1H, Ar-H), 7.32-7.28 (m, 2H, Ar-H), 7.10 (t,  $J = 7.9$  Hz, 1H, Ar-H), 6.83-6.78 (m, 4H, Ar-H), 6.68-6.65 (m, 1H, Ar-H), 5.20 (s, 1H, -CH-), 3.68 (s, 3H, -OCH<sub>3</sub>), 3.67 (s, 3H, -OCH<sub>3</sub>);  $^{13}\text{C}$  NMR (100 MHz,  $\text{DMSO-}d_6 + \text{CDCl}_3$ )  $\delta$  (ppm) : 160.5, 159.1, 155.8, 152.2, 148.7, 143.5, 131.4, 129.2, 129.0, 125.3, 123.4, 122.6, 119.3, 117.3, 116.7, 113.9, 113.5, 113.4, 113.1, 110.8, 94.8, 55.1, 54.8, 41.2; Anal. calcd. for  $\text{C}_{24}\text{H}_{19}\text{NO}_4$ : C, 74.79; H, 4.97; N, 3.63 %. Found: C, 74.81; H, 4.99; N, 3.67%.

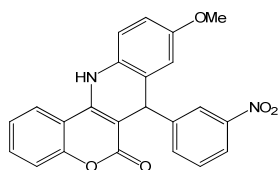

9-methoxy-7-(3-nitrophenyl)-7,12-dihydro-6H-chromeno[4,3-b]quinolin-6-one (**4i**): Yellow solid; Yield: 92%, m.p. 308-310  $^{\circ}\text{C}$ ; IR (KBr): 3342, 3091, 2989, 2929, 2836, 1658, 1613, 1531, 1510, 1348, 1244, 1204, 1116, 1054  $\text{cm}^{-1}$ ;  $^1\text{H}$  NMR (500 MHz,  $\text{DMSO-}d_6$ )  $\delta$  (ppm) 9.94 (s, 1H, NH), 8.29 (d,  $J = 8.0$  Hz, 1H, Ar-H), 8.07 (s, 1H, Ar-H), 7.96 (d,  $J = 7.2$  Hz, 1H, Ar-H), 7.68 (d,  $J = 7.7$  Hz, 1H, Ar-H), 7.60 (t,  $J = 7.8$  Hz, 1H, Ar-H), 7.49 (t,  $J = 8.0$  Hz, 1H, Ar-H), 7.42 (t,  $J = 7.4$  Hz, 1H, Ar-H), 7.33-7.31(m, 2H, Ar-H), 6.84-6.82 (m, 2H, Ar-H), 5.43 (s, 1H, -CH-), 3.63 (s, 3H, -OCH<sub>3</sub>);  $^{13}\text{C}$  NMR (125 MHz,  $\text{DMSO-}d_6$ )  $\delta$  (ppm): 161.0, 156.6, 152.8, 149.7, 148.3, 144.4, 134.6, 132.5, 130.5, 129.5, 124.9, 124.4, 123.4, 122.2, 122.0, 118.3, 117.5, 114.8, 114.4, 113.9, 94.6, 55.8, 41.4 ; Anal. calcd. for  $\text{C}_{23}\text{H}_{16}\text{N}_2\text{O}_5$ : C, 69.00; H, 4.03; N, 7.00 %. Found: C, 69.03; H, 4.07; N, 7.04%.

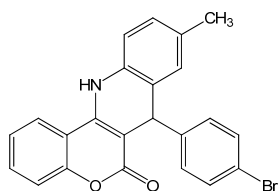

7-(4-bromophenyl)-9-methyl-7,12-dihydro-6H-chromeno[4,3-b]quinolin-6-one (**4j**): White solid; Yield: 92%, m.p. 294-296  $^{\circ}\text{C}$ ; IR (KBr): 3323, 3033, 2997, 2913, 2858, 1653, 1614, 1567, 1525, 1481, 1405, 1288, 1197, 1052, 1009  $\text{cm}^{-1}$ ;  $^1\text{H}$  NMR (400 MHz,  $\text{DMSO-}d_6 + \text{CDCl}_3$ )  $\delta$  (ppm): 9.73 (s, 1H, NH), 8.30 (d,  $J = 7.8$  Hz, 1H, Ar-H), 7.58-7.54 (m, 1H, Ar-H), 7.38-7.36 (m, 1H, Ar-H), 7.33 (d,  $J = 8.3$  Hz, 2H, Ar-H), 7.28-7.24 (m, 2H, Ar-H), 7.19 (d,  $J = 8.4$  Hz, 2H, Ar-H), 6.98 (d,  $J = 8.2$  Hz, 1H, Ar-H), 6.91 (s, 1H, Ar-H), 5.21 (s, 1H, -CH-), 2.22 (s, 3H, -CH<sub>3</sub>);  $^{13}\text{C}$  NMR (100 MHz,  $\text{DMSO-}d_6 + \text{CDCl}_3$ )  $\delta$  (ppm): 160.7, 152.2, 146.5, 143.6, 133.0, 132.8, 131.2, 130.9, 129.4, 129.2, 127.9, 123.3, 123.2, 122.6, 119.4, 116.6, 116.2, 113.5, 95.6, 40.7, 20.4; Anal. calcd. for  $\text{C}_{23}\text{H}_{16}\text{BrNO}_2$ : C, 66.04; H, 3.86; N, 3.35 %. Found: C, 66.07; H, 3.89; N, 3.38 %.

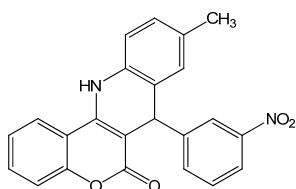

9-methyl-7-(3-nitrophenyl)-7,12-dihydro-6H-chromeno[4,3-b]quinolin-6-one (**4k**): Light yellow solid; Yield: 89%, m.p. 328-330 °C; IR (KBr): 3338, 3091, 3002, 2900, 1659, 1612, 1531, 1481, 1344, 1197, 1057  $\text{cm}^{-1}$ ;  $^1\text{H}$  NMR (400 MHz,  $\text{DMSO-}d_6 + \text{CDCl}_3$ )  $\delta$  (ppm): 9.90 (s, 1H, NH), 8.33 (dd,  $J = 8.1, 1.2$  Hz, 1H, Ar-H), 8.07 (t,  $J = 1.9$ , 1H, Ar-H), 7.97 (ddd,  $J = 8.1, 2.2, 0.8$  Hz, 1H, Ar-H), 7.70 (d,  $J = 7.8$  Hz, 1H, Ar-H), 7.61-7.57 (m, 1H), 7.49 (t,  $J = 7.9$  Hz, 1H, Ar-H), 7.42-7.38 (m, 1H, Ar-H), 7.32-7.29 (m, 2H, Ar-H), 7.03 (dd,  $J = 8.2, 1.5$  Hz, 1H, Ar-H), 6.97 (s, 1H, Ar-H), 5.42 (s, 1H, -CH-), 2.22 (s, 3H, -CH<sub>3</sub>);  $^{13}\text{C}$  NMR (100 MHz,  $\text{DMSO-}d_6 + \text{CDCl}_3$ )  $\delta$  (ppm): 160.6, 152.3, 149.2, 147.7, 143.8, 133.9, 133.1, 131.5, 129.6, 129.4, 128.4, 123.4, 122.8, 122.7, 121.8, 121.1, 116.7, 116.4, 113.4, 95.2, 40.9, 20.4; Anal. calcd. for  $\text{C}_{23}\text{H}_{16}\text{N}_2\text{O}_4$ : C, 71.87; H, 4.20; N, 7.29 %. Found: C, 71.89; H, 4.24; N, 7.32 %.

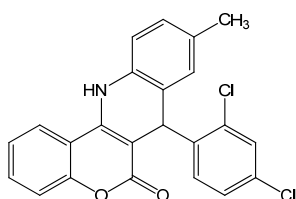

7-(2,4-dichlorophenyl)-9-methyl-7,12-dihydro-6H-chromeno[4,3-b]quinolin-6-one (**4l**): White solid; Yield: 93%, m.p. 292-294 °C; IR (KBr): 3323, 3036, 2923, 1662, 1611, 1534, 1509, 1483, 1391, 1207, 1054  $\text{cm}^{-1}$ ;  $^1\text{H}$  NMR (400 MHz,  $\text{DMSO-}d_6$ )  $\delta$  (ppm): 9.88 (s, 1H, NH), 8.32 (d,  $J = 8.0$  Hz, 1H, Ar-H), 7.65-7.62 (m, 1H, Ar-H), 7.52-7.51 (m, 1H, Ar-H), 7.46-7.43 (m, 1H, Ar-H), 7.35 (d,  $J = 8.0$  Hz, 1H, Ar-H), 7.28-7.21 (m, 3H, Ar-H), 6.99 (d,  $J = 7.5$  Hz, 1H, Ar-H), 6.92 (s, 1H, Ar-H), 5.70 (s, 1H, -CH-), 2.15 (s, 3H, CH<sub>3</sub>);  $^{13}\text{C}$  NMR (100 MHz,  $\text{DMSO-}d_6$ )  $\delta$  (ppm): 160.7, 152.8, 144.9, 144.8, 133.4, 133.2, 132.4, 132.3, 132.2, 131.9, 129.2, 129.1, 129.0, 128.4, 124.2, 123.5, 123.3, 117.4, 117.1, 113.7, 95.4, 38.1, 20.9; Anal. calcd. for  $\text{C}_{23}\text{H}_{15}\text{Cl}_2\text{NO}_2$ : C, 67.66; H, 3.70; N, 3.43 %. Found: C, 67.68; H, 3.73; N, 3.46 %.

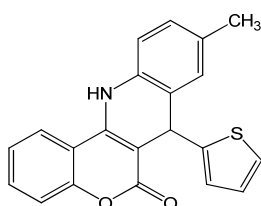

9-methyl-7-(thiophen-2-yl)-7,12-dihydro-6H-chromeno[4,3-b]quinolin-6-one (**4m**): Brown solid; Yield: 93%, m.p. 284-286°C; IR (KBr): 3314, 3070, 2911, 1661, 1613, 1571, 1529, 1505, 1482, 1256, 1199, 1058 cm<sup>-1</sup>; <sup>1</sup>H NMR (400 MHz, DMSO-*d*<sub>6</sub> + CDCl<sub>3</sub>) δ (ppm): 9.80 (s, 1H, NH), 8.22 (dd, *J* = 8.0, 0.9 Hz, 1H, Ar-H), 7.53-7.48 (m, 1H, Ar-H), 7.30 (t, *J* = 7.4 Hz, 1H, Ar-H), 7.24 (d, *J* = 8.2 Hz, 1H, Ar-H), 7.18 (d, *J* = 8.1 Hz, 1H, Ar-H), 7.06-7.02 (m, 2H, Ar-H), 6.96 (d, *J* = 8.2 Hz, 1H, Ar-H), 6.75-6.71 (m, 2H, Ar-H), 5.44 (s, 1H, -CH-), 2.19 (s, 3H, -CH<sub>3</sub>); <sup>13</sup>C NMR (100 MHz, DMSO-*d*<sub>6</sub> + CDCl<sub>3</sub>) δ (ppm): 160.6, 152.2, 150.9, 143.5, 133.1, 132.8, 131.4, 129.3, 128.2, 126.3, 123.8, 123.4, 123.3, 123.1, 122.7, 116.7, 116.2, 113.5, 95.6, 36.1, 20.5; Anal. calcd. for C<sub>21</sub>H<sub>15</sub>NO<sub>2</sub>S: C, 73.02; H, 4.38; N, 4.06 %. Found: C, 73.05; H, 4.40; N, 4.09 %.

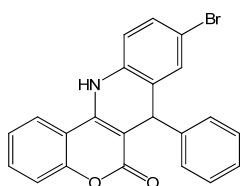

9-bromo-7-phenyl-7,12-dihydro-6H-chromeno[4,3-b]quinolin-6-one (**4n**): White solid; Yield: 90%, m.p. 335-337 °C; IR (KBr): 3323, 3097, 1663, 1624, 1570, 1528, 1479, 1406, 1323, 1293, 1255, 1206, 1183, 1054 cm<sup>-1</sup>; <sup>1</sup>H NMR (400 MHz, DMSO-*d*<sub>6</sub> + CDCl<sub>3</sub>) δ (ppm): 9.78 (s, 1H, NH), 8.27 (dd, *J* = 8.0, 1.0 Hz, 1H, Ar-H), 7.57-7.53 (m, 1H, Ar-H), 7.37-7.33 (m, 1H, Ar-H), 7.31-7.20 (m, 8H, Ar-H), 7.14-7.10 (m, 1H, Ar-H), 5.24 (s, 1H, -CH); <sup>13</sup>C NMR (100 MHz, DMSO-*d*<sub>6</sub> + CDCl<sub>3</sub>) δ (ppm): 160.6, 152.2, 146.6, 143.4, 134.8, 131.5, 131.2, 129.8, 128.1, 127.1, 126.3, 126.2, 123.2, 122.4, 118.0, 116.6, 115.1, 113.3, 96.5, 41.0; Anal. calcd. for C<sub>22</sub>H<sub>14</sub>BrNO<sub>2</sub>: C, 65.36; H, 3.49; N, 3.46 %. Found: C, 65.38; H, 3.51; N, 3.49 %.

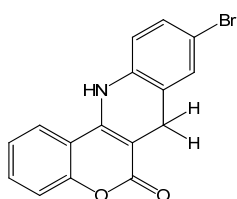

9-bromo-7,12-dihydro-6H-chromeno[4,3-b]quinolin-6-one (**4o**): White solid; Yield: 94%, m.p. 332-334 °C; IR (KBr): 3343, 3056, 2913, 2863, 1672, 1626, 1570, 1529, 1488, 1406, 1324, 1294, 1217, 1176, 1059 cm<sup>-1</sup>; <sup>1</sup>H NMR (400 MHz, DMSO-*d*<sub>6</sub> + CDCl<sub>3</sub>) δ (ppm): 9.53 (s, 1H, NH), 8.17 (d, *J* = 8.1 Hz, 1H, Ar-H), 7.59 (t, *J* = 7.1 Hz, 1H, Ar-H), 7.41-7.28 (m, 4H, Ar-H), 7.13 (d, *J* = 8.5 Hz, 1H, Ar-H), 3.84 (s, 2H, -CH<sub>2</sub>-); <sup>13</sup>C NMR (125 MHz, DMSO-*d*<sub>6</sub>) δ (ppm): 161.8, 152.4, 145.1, 137.0, 131.3, 128.4, 127.1, 123.4, 123.0, 122.1, 118.5, 116.7, 116.3, 113.1, 92.0, 25.3; Anal. calcd. for C<sub>16</sub>H<sub>10</sub>BrNO<sub>2</sub>: C, 58.56; H, 3.07; N, 4.27 %. Found: C, 58.59; H, 3.05; N, 4.30 %.



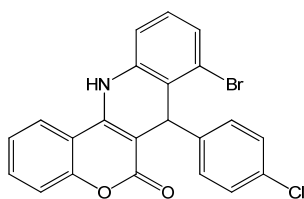

8-bromo-7-(4-chlorophenyl)-7,12-dihydro-6*H*-chromeno[4,3-*b*]quinolin-6-one (**4p**): White solid; Yield: 89%, m.p. 324-326 °C; IR (KBr): 3323, 3077, 2923, 1672, 1631, 1611, 1524, 1483, 1412, 1284, 1212, 1054, 1018 cm<sup>-1</sup>; <sup>1</sup>H NMR (400 MHz, DMSO-*d*<sub>6</sub> + CDCl<sub>3</sub>) δ (ppm) : 9.88 (s, 1H, NH), 8.26 (dd, *J* = 8.1, 1.1 Hz, 1H, Ar-H), 7.60 (td, *J* = 8.4, 1.3 Hz, 1H, Ar-H), 7.56 (d, *J* = 1.0 Hz, 1H, Ar-H), 7.41 (td, *J* = 8.1, 1.0 Hz, 1H, Ar-H), 7.31 (dd, *J* = 8.2, 0.9 Hz, 1H, Ar-H), 7.27-7.20 (m, 4H, Ar-H), 7.09 (s, 2H, Ar-H), 5.25 (s, 1H, -CH-); <sup>13</sup>C NMR (125 MHz, DMSO-*d*<sub>6</sub> + CDCl<sub>3</sub>) δ (ppm): 161.3, 152.7, 145.7, 144.1, 137.4, 132.0, 131.4, 129.2, 128.6, 126.7, 124.1, 123.2, 122.9, 120.7, 119.3, 117.2, 113.7, 97.1, 40.7; Anal. calcd. for C<sub>22</sub>H<sub>13</sub>BrClNO<sub>2</sub>: C, 60.23; H, 2.99; N, 3.19 %. Found: C, 60.26; H, 3.01; N, 3.23 %.

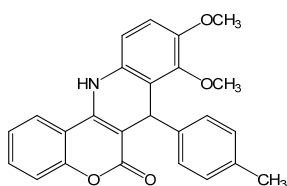

8,9-dimethoxy-7-*p*-tolyl-7,12-dihydro-6*H*-chromeno[4,3-*b*]quinolin-6-one (**4q**): Yellow solid; Yield: 92%, m.p. 278-280 °C; IR (KBr): 3286, 3061, 2995, 2911, 2854, 1693, 1628, 1571, 1543, 1515, 1326, 1213, 1124, 1044 cm<sup>-1</sup>; <sup>1</sup>H NMR (400 MHz, DMSO-*d*<sub>6</sub> + CDCl<sub>3</sub>) δ (ppm): 9.63 (s, 1H, NH), 8.22 (d, *J* = 7.7 Hz, 1H, Ar-H), 7.54 (t, *J* = 7.4 Hz, 1H, Ar-H), 7.38 (t, *J* = 7.5 Hz, 1H, Ar-H), 7.27 (d, *J* = 8.2 Hz, 1H, Ar-H), 7.11 (d, *J* = 8.0 Hz, 2H, Ar-H), 6.98-6.96 (m, 2H + 1H, Ar-H), 6.66 (s, 1H, Ar-H), 5.13 (s, 1H, -CH-), 3.80 (s, 3H, -OCH<sub>3</sub>), 3.67 (s, 3H, -OCH<sub>3</sub>), 2.18 (s, 3H, -CH<sub>3</sub>); <sup>13</sup>C NMR (100 MHz, DMSO-*d*<sub>6</sub> + CDCl<sub>3</sub>) δ (ppm): 160.6, 152.2, 148.0, 145.5, 144.6, 143.2, 134.9, 131.1, 128.9, 128.6, 126.9, 123.3, 122.4, 116.6, 115.7, 113.6, 112.2, 100.6, 95.6, 55.8, 55.4, 40.5, 20.5; Anal. calcd. for C<sub>25</sub>H<sub>21</sub>NO<sub>4</sub>: C, 75.17; H, 5.30; N, 3.51 %. Found: C, 75.19; H, 5.33; N, 3.55 %.

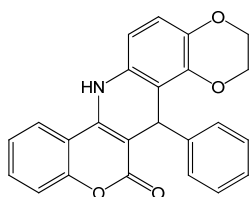

14-phenyl-7,14-dihydro-2*H*-chromeno[4,3-*b*][1,4]dioxino[2,3-*f*]quinolin-13(3*H*)-one (**4r**): Yellow solid; Yield: 90%, m.p. 340-342 °C; IR (KBr): 3324, 3066, 3026, 2974, 2912, 2868, 1665, 1618,

1571, 1538, 1500, 1425, 1322, 1303, 1242, 1204, 1194, 1067, 1048  $\text{cm}^{-1}$ ;  $^1\text{H}$  NMR (400 MHz,  $\text{DMSO-}d_6 + \text{CDCl}_3$ )  $\delta$  (ppm): 9.54 (s, 1H, NH), 8.18 (d,  $J = 8.2$  Hz, 1H, Ar-H), 7.48 (t,  $J = 8.4$  Hz, 1H, Ar-H), 7.29 (t,  $J = 8.1$  Hz, 1H, Ar-H), 7.21-7.13 (m, 5H, Ar-H), 7.03-6.99 (m, 1H, Ar-H), 6.82 (s, 1H, Ar-H), 6.54 (s, 1H, Ar-H), 5.06 (s, 1H, -CH-), 4.16-4.08 (m, 4H, 2- $\text{CH}_2$ -);  $^{13}\text{C}$  NMR (100 MHz,  $\text{DMSO-}d_6 + \text{CDCl}_3$ )  $\delta$  (ppm): 160.6, 152.2, 147.5, 143.4, 142.3, 139.9, 131.1, 129.2, 128.0, 127.0, 125.9, 123.2, 122.5, 117.5, 116.8, 116.6, 113.5, 104.4, 95.4, 64.1, 63.8, 40.7; Anal. calcd. for  $\text{C}_{24}\text{H}_{17}\text{NO}_4$ : C, 75.19; H, 4.47; N, 3.65 %. Found: C, 75.21; H, 4.50; N, 3.67 %.

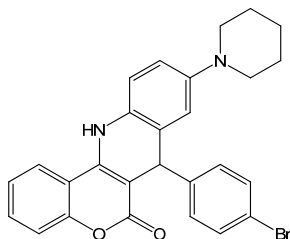

7-(4-bromophenyl)-9-(piperidin-1-yl)-7,12-dihydro-6H-chromeno[4,3-b]quinolin-6-one (**4s**): Light yellow solid; Yield: 91%, m.p. 212-214  $^\circ\text{C}$ ; IR (KBr): 3313, 3020, 2943, 2851, 1667, 1626, 1529, 1509, 1396, 1202, 1166, 1110, 1069, 1013  $\text{cm}^{-1}$ ;  $^1\text{H}$  NMR (400 MHz,  $\text{DMSO-}d_6$ )  $\delta$  (ppm): 9.82 (s, 1H, NH), 8.30 (d,  $J = 7.4$  Hz, 1H, Ar-H), 7.62-7.58 (m, 1H, Ar-H), 7.44 (d,  $J = 8.3$  Hz, 2H, Ar-H), 7.42-7.34 (m, 3H, Ar-H), 7.21 (d,  $J = 8.4$  Hz, 2H, Ar-H), 6.84 (dd,  $J = 8.8, 2.5$  Hz, 1H, Ar-H), 6.79 (d,  $J = 2.4$  Hz, 1H, Ar-H), 5.22 (s, 1H, -CH-), 3.02-2.99 (m, 4H, 2- $\text{CH}_2$ -), 1.57-1.55 (m, 4H, 2- $\text{CH}_2$ -), 1.49-1.47 (m, 2H, - $\text{CH}_2$ -);  $^{13}\text{C}$  NMR (100 MHz,  $\text{DMSO-}d_6$ )  $\delta$  (ppm): 160.9, 152.0, 146.9, 143.4, 139.3, 131.1, 131.0, 130.4, 129.4, 127.6, 124.3, 119.2, 117.1, 116.8, 116.6, 115.7, 113.5, 103.6, 94.4, 50.0, 40.9, 28.6, 25.2; Anal. calcd. for  $\text{C}_{27}\text{H}_{23}\text{BrN}_2\text{O}_2$ : C, 66.54; H, 4.76; N, 5.75%; Found: C, 66.56; H, 4.79; N, 5.78%.

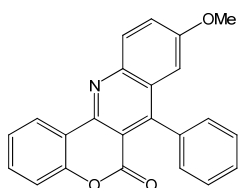

9-methoxy-7-phenyl-6H-chromeno[4,3-b]quinolin-6-one (**5e**): Yellow solid; Yield: 98%, m.p. 308-310  $^\circ\text{C}$ ; IR (KBr): 3077, 2974, 2940, 1739, 1626, 1555, 1498, 1468, 1412, 1268, 1233, 1176, 1100  $\text{cm}^{-1}$ ;  $^1\text{H}$  NMR (500 MHz,  $\text{CDCl}_3$ )  $\delta$  (ppm): 8.83 (d,  $J = 7.5$  Hz, 1H, Ar-H), 8.17 (d,  $J = 9.0$  Hz, 1H, Ar-H), 7.62-7.53 (m, 5H, Ar-H), 7.41 (t,  $J = 7.5$  Hz, 1H, Ar-H), 7.33-7.28 (m, 3H, Ar-H), 6.72 (s, 1H, Ar-H), 3.69 (s, 3H, - $\text{OCH}_3$ );  $^{13}\text{C}$  NMR (125 MHz,  $\text{CDCl}_3$ )  $\delta$  (ppm): 159.6, 158.1, 153.4, 152.4, 147.9, 146.9, 137.3, 131.7, 131.0, 129.2, 128.4, 128.1, 127.8, 126.1, 125.3, 124.5, 120.0, 116.9,

113.3, 105.0, 55.4; Anal. calcd. for C<sub>23</sub>H<sub>15</sub>NO<sub>3</sub>: C, 78.17; H, 4.28; N, 3.96 %. Found: C, 78.20; H, 4.31; N, 3.99 %.

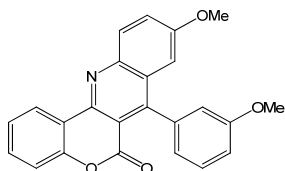

9-methoxy-7-(3-methoxyphenyl)-6*H*-chromeno[4,3-*b*]quinolin-6-one (**5h**): Yellow solid; Yield: 99 %, m.p. 254-256 °C; IR (KBr): 3056, 2998, 2974, 2938, 2842, 1744, 1621, 1544, 1493, 1412, 1360, 1222, 1176, 1115, 1054 cm<sup>-1</sup>; <sup>1</sup>H NMR (400 MHz, CDCl<sub>3</sub>) δ (ppm): 8.79 (d, *J* = 8.0 Hz, 1H, Ar-H), 8.14 (d, *J* = 8.0 Hz, 1H, Ar-H), 7.56-7.38 (m, 4H, Ar-H), 7.30 (t, *J* = 8.0 Hz, 1H, Ar-H), 7.07 (d, *J* = 8.0 Hz, 1H, Ar-H), 6.88 (d, *J* = 8.0 Hz, 1H, Ar-H), 6.83 (d, *J* = 4.0 Hz, 1H, Ar-H), 6.76 (d, *J* = 4.0 Hz, 1H, Ar-H), 3.86 (s, 3H, -OCH<sub>3</sub>), 3.70 (s, 3H, -OCH<sub>3</sub>); <sup>13</sup>C NMR (100 MHz, CDCl<sub>3</sub>) δ (ppm): 159.4, 158.1, 153.0, 152.3, 147.9, 146.8, 138.6, 133.4, 131.7, 130.9, 129.5, 129.0, 126.1, 125.3, 124.6, 120.3, 120.0, 116.9, 115.7, 114.7, 113.7, 105.0, 55.4, 55.3; Anal. calcd. for C<sub>24</sub>H<sub>17</sub>NO<sub>4</sub>: C, 75.19; H, 4.47; N, 3.65 %. Found: C, 75.21; H, 4.49; N, 3.70 %.

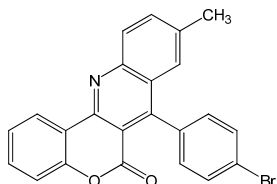

7-(4-bromophenyl)-9-methyl-6*H*-chromeno[4,3-*b*]quinolin-6-one (**5j**): Light yellow solid; Yield: 98%, m.p. 274-276 °C; IR (KBr): 3079, 2964, 1750, 1599, 1543, 1486, 1458, 1364, 1181, 1101 cm<sup>-1</sup>; <sup>1</sup>H NMR (500 MHz, CDCl<sub>3</sub>) δ (ppm) : 8.81 (d, *J* = 8.0 Hz, 1H, Ar-H), 8.13 (d, *J* = 9.0 Hz, 1H, Ar-H), 7.74-7.67 (m, 3H, Ar-H), 7.57-7.54 (m, 1H, Ar-H), 7.42-7.39 (m, 1H, Ar-H), 7.31 (d, *J* = 8.0 Hz, 1H, Ar-H), 7.20 (bs, 1H, Ar-H), 7.17 (d, *J* = 8.0 Hz, 2H, Ar-H), 2.43 (s, 3H, -CH<sub>3</sub>); <sup>13</sup>C NMR (125 MHz, CDCl<sub>3</sub>) δ (ppm): 159.6, 153.1, 152.5, 149.2, 149.0, 137.7, 136.1, 135.4, 132.1, 131.6, 129.7, 129.3, 127.6, 126.3, 125.5, 124.6, 122.3, 119.8, 116.9, 113.0, 21.9; Anal. calcd. for C<sub>23</sub>H<sub>14</sub>BrNO<sub>2</sub>: C, 66.36; H, 3.39; N, 3.36%. Found: C, 66.39; H, 3.42; N, 3.40 %.

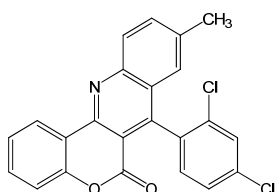

7-(2,4-dichlorophenyl)-9-methyl-6*H*-chromeno[4,3-*b*]quinolin-6-one (**5l**): White solid; Yield: 99%, m.p. 282-284 °C; IR (KBr): 3080, 2920, 1736, 1595, 1552, 1463, 1364, 1185, 1110, 1058 cm<sup>-1</sup>; <sup>1</sup>H NMR (400 MHz, CDCl<sub>3</sub>) δ (ppm) : 8.84 (d, *J* = 8.0 Hz, 1H, Ar-H), 8.19 (d, *J* = 8.0 Hz, 1H, Ar-H), 7.75 (d, *J* = 8.0 Hz, 1H, Ar-H), 7.63-7.56 (m, 2H, Ar-H), 7.47-7.41 (m, 2H, Ar-H), 7.34 (d, *J* = 8.0 Hz, 1H, Ar-H), 7.29-7.14 (m, 2H, Ar-H), 2.47 (s, 3H, -CH<sub>3</sub>); <sup>13</sup>C NMR (125 MHz, DMSO+CDCl<sub>3</sub>) δ (ppm): 159.2, 152.2, 149.7, 149.3, 149.0, 138.1, 135.7, 134.7, 134.6, 133.0, 132.2, 130.1, 129.4, 129.3, 127.3, 126.8, 125.4, 125.3, 124.7, 119.6, 116.8, 113.4, 21.8; Anal. calcd. for C<sub>23</sub>H<sub>13</sub>Cl<sub>2</sub>NO<sub>2</sub>: C, 68.00; H, 3.23; N, 3.45 %. Found: C, 68.03; H, 3.26; N, 3.49 %.

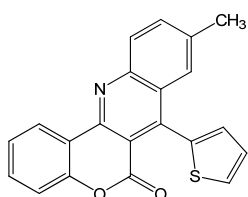

9-methyl-7-(thiophen-2-yl)-6*H*-chromeno[4,3-*b*]quinolin-6-one (**5m**): Brown solid; Yield: 97%, m.p. 252-254 °C; IR (KBr): 3080, 2920, 1736, 1552, 1468, 1185, 1096 cm<sup>-1</sup>; <sup>1</sup>H NMR (400 MHz, CDCl<sub>3</sub>) δ (ppm): 8.79 (d, *J* = 8.0 Hz, 1H, Ar-H), 8.13 (d, *J* = 8.0 Hz, 1H, Ar-H), 7.72 (s, 1H, Ar-H), 7.55-7.53 (m, 3H, Ar-H), 7.48-7.42 (m, 1H, Ar-H), 7.31 (d, *J* = 8.0 Hz, 1H, Ar-H), 7.21 (d, *J* = 4.0 Hz, 1H, Ar-H), 6.82 (d, *J* = 4.0 Hz, 1H, Ar-H), 2.48 (s, 3H, -CH<sub>3</sub>); <sup>13</sup>C NMR (125 MHz, CDCl<sub>3</sub>) δ (ppm): 158.9, 152.4, 149.1, 148.9, 138.2, 138.1, 135.7, 132.3, 130.0, 129.2, 128.6, 127.8, 126.0, 125.5, 124.9, 124.7, 119.6, 116.9, 114.5, 113.7, 22.0; Anal. calcd. for C<sub>21</sub>H<sub>13</sub>NO<sub>2</sub>S: C, 73.45; H, 3.82; N, 4.08 %. Found: C, 73.48; H, 3.85; N, 4.13 %.

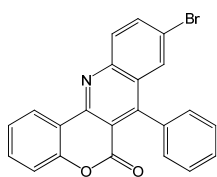

9-bromo-7-phenyl-6*H*-chromeno[4,3-*b*]quinolin-6-one (**5n**): Light yellow solid; Yield: 99%, m.p. 264-266 °C; IR (KBr): 3061, 1750, 1618, 1548, 1482, 1176, 1105 cm<sup>-1</sup>; <sup>1</sup>H NMR (500 MHz, CDCl<sub>3</sub>) δ (ppm): 8.79 (d, *J* = 7.5 Hz, 1H, Ar-H), 8.08 (d, *J* = 9.0 Hz, 1H, Ar-H), 7.90 (d, *J* = 8.5 Hz, 1H, Ar-H), 7.65-7.56 (m, 5H, Ar-H), 7.43-7.39 (m, 1H, Ar-H), 7.31-7.25 (m, 3H, Ar-H); <sup>13</sup>C NMR (125 MHz, CDCl<sub>3</sub>) δ (ppm): 159.0, 154.7, 152.7, 150.4, 148.8, 136.2, 136.1, 132.6, 131.1, 130.1, 129.1, 128.5, 127.9, 125.7, 124.7, 121.5, 119.5, 117.0, 113.8; Anal. calcd. for C<sub>22</sub>H<sub>12</sub>BrNO<sub>2</sub>: C, 65.69; H, 3.01; N, 3.48 %. Found: C, 65.71; H, 3.04; N, 3.52 %.

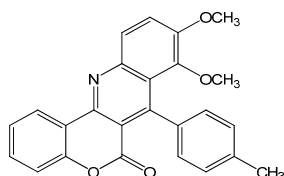

8,9-dimethoxy-7-*p*-tolyl-6*H*-chromeno[4,3-*b*]quinolin-6-one (**5q**) : Yellow solid; Yield: 98%, m.p. 290-292 °C; IR (KBr): 3004, 2948, 2883, 2835, 1731, 1618, 1548, 1496, 1421, 1275, 1246, 1223, 1152, 1105, 1016 cm<sup>-1</sup>; <sup>1</sup>H NMR (400 MHz, CDCl<sub>3</sub>) δ (ppm): 8.77 (bs, 1H, Ar-H), 7.52-7.48 (m, 2H, Ar-H), 7.40-7.30 (m, 4H, Ar-H), 7.20-7.19 (m, 1H, Ar-H), 7.18-7.16 (m, 1H, Ar-H), 6.74-6.72 (m, 1H, Ar-H), 4.12 (s, 3H, -OCH<sub>3</sub>), 3.73 (s, 3H, -OCH<sub>3</sub>), 2.50 (s, 3H, -CH<sub>3</sub>); <sup>13</sup>C NMR (100 MHz, CDCl<sub>3</sub>) δ (ppm): 159.8, 155.4, 152.7, 152.4, 150.1, 148.5, 148.4, 137.6, 134.5, 131.5, 129.1, 127.8, 125.1, 124.3, 124.1, 120.0, 116.8, 111.6, 107.4, 105.0, 56.5, 55.8, 21.6; Anal. calcd. for C<sub>25</sub>H<sub>19</sub>NO<sub>4</sub>: C, 75.55; H, 4.82; N, 3.52 %. Found: C, 75.57; H, 4.86; N, 3.57 %.

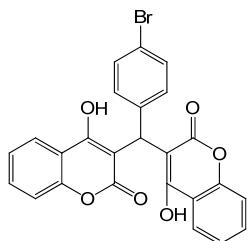

3-((4-bromophenyl)(4-hydroxy-2-oxo-4a,8a-dihydro-2*H*-chromen-3-yl)methyl)-4-hydroxy-2*H*-chromen-2-one (**6**): White solid; Yield: 98%, m.p. 268 °C; IR (KBr): 3279, 3058, 2825, 1769, 1667, 1605, 1560, 1481, 1451 cm<sup>-1</sup>; <sup>1</sup>H NMR (400 MHz, DMSO-*d*<sub>6</sub> + CDCl<sub>3</sub>) δ (ppm) : 8.62-9.31 (broad, 2H, -OH), 7.96 (dd, *J* = 7.96, 1.48 Hz, 2H, Ar-H), 7.63-7.59 (m, 2H, Ar-H), 7.43-7.32 (m, 6H, Ar-H), 7.15 (dd, *J* = 7.56, 1.80 Hz, 2H, Ar-H), 6.39 (s, 1H, -CH-); <sup>13</sup>C NMR (100 MHz, DMSO-*d*<sub>6</sub> + CDCl<sub>3</sub>) δ (ppm): 164.9, 164.8, 152.1, 138.6, 132.0, 130.8, 128.9, 123.8, 123.8, 118.8, 117.3, 115.9, 103.9, 35.5; Anal. calcd. for C<sub>25</sub>H<sub>15</sub>BrO<sub>6</sub>: C, 61.12; H, 3.08%; Found: C, 61.14; H, 3.06%.

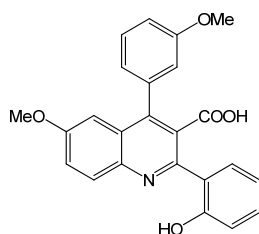

2-(2-hydroxyphenyl)-6-methoxy-4-(3-methoxyphenyl)quinoline-3-carboxylic acid (**7h**): Light yellow brown solid; Yield: 54%, m.p. 250-252 °C; IR (KBr): 3523, 3243-3100 (broad band), 3004, 2946, 2839, 1741, 1647, 1622, 1585, 1503, 1454, 1413, 1372, 1240 cm<sup>-1</sup>; <sup>1</sup>H NMR (400 MHz, DMSO-*d*<sub>6</sub> +

CDCl<sub>3</sub>)  $\delta$  (ppm): 12.75 (brs, 1H, -COOH), 10.98 (brs, 1H, -OH), 8.02 (d,  $J = 8.0$  Hz, 1H, Ar-H), 7.53 (dd,  $J = 7.7, 1.5$  Hz, 1H, Ar-H), 7.49-7.43 (m, 2H, Ar-H), 7.25 (td,  $J = 8.4, 1.6$  Hz, 1H, Ar-H), 7.07-7.04 (m, 1H, Ar-H), 7.00-6.94 (m, 3H, Ar-H), 6.89-6.85 (m, 1H, Ar-H), 6.83 (d,  $J = 2.7$  Hz, 1H, Ar-H), 3.83 (s, 3H, -OCH<sub>3</sub>), 3.72 (s, 3H, -OCH<sub>3</sub>); <sup>13</sup>C NMR (125 MHz, DMSO-*d*<sub>6</sub>)  $\delta$  (ppm): 169.1, 159.4, 158.3, 156.1, 152.2, 144.3, 142.7, 137.3, 131.0, 130.5, 130.4, 130.0, 129.3, 126.4, 126.3, 122.9, 122.0, 119.0, 116.5, 115.3, 114.5, 104.8, 55.8, 55.6; Anal. calcd. for C<sub>24</sub>H<sub>19</sub>NO<sub>5</sub>: C, 71.81; H, 4.77; N, 3.49 %. Found: C, 71.83; H, 4.79; N, 3.52 %.

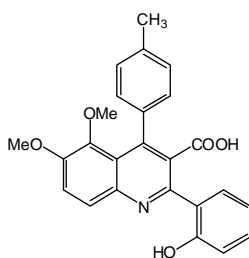

2-(2-hydroxyphenyl)-5,6-dimethoxy-4-*p*-tolylquinoline-3-carboxylic acid (**7q**): Yellow solid; Yield: 60%, m.p. 265-267 °C; IR (KBr): 3498, 3327-3120 (broad band), 3020, 2948, 2846, 1731, 1628, 1598, 1505, 1417, 1260 cm<sup>-1</sup>; <sup>1</sup>H NMR (400 MHz, DMSO-*d*<sub>6</sub> + CDCl<sub>3</sub>)  $\delta$  (ppm) : 7.53 (dd,  $J = 7.7, 1.5$  Hz, 1H, Ar-H), 7.49 (s, 1H, Ar-H), 7.34 (d,  $J = 8.0$  Hz, 2H, Ar-H), 7.29 (d,  $J = 8.0$  Hz, 2H, Ar-H), 7.25 (td,  $J = 8.0, 1.5$  Hz, 1H, Ar-H), 6.95 (d,  $J = 7.3$  Hz, 1H, Ar-H), 6.86 (t,  $J = 7.5$  Hz, 1H, Ar-H), 6.75 (s, 1H, Ar-H), 3.99 (s, 3H, -OCH<sub>3</sub>), 3.69 (s, 3H, -OCH<sub>3</sub>), 2.44 (s, 3H, -CH<sub>3</sub>); <sup>13</sup>C NMR (125 MHz, DMSO-*d*<sub>6</sub>)  $\delta$  (ppm): 169.5, 156.4, 153.4, 152.1, 150.4, 144.6, 143.7, 138.1, 133.3, 130.4, 130.2, 129.5, 129.4, 127.3, 125.8, 120.7, 119.0, 116.7, 108.0, 104.0, 56.4, 55.8, 21.4; Anal. calcd. for C<sub>25</sub>H<sub>21</sub>NO<sub>5</sub>: C, 72.28; H, 5.10; N, 3.37 %. Found: C, 72.31; H, 5.14; N, 3.40 %.

$^1\text{H}$  and  $^{13}\text{C}$  NMR spectra for **4a**

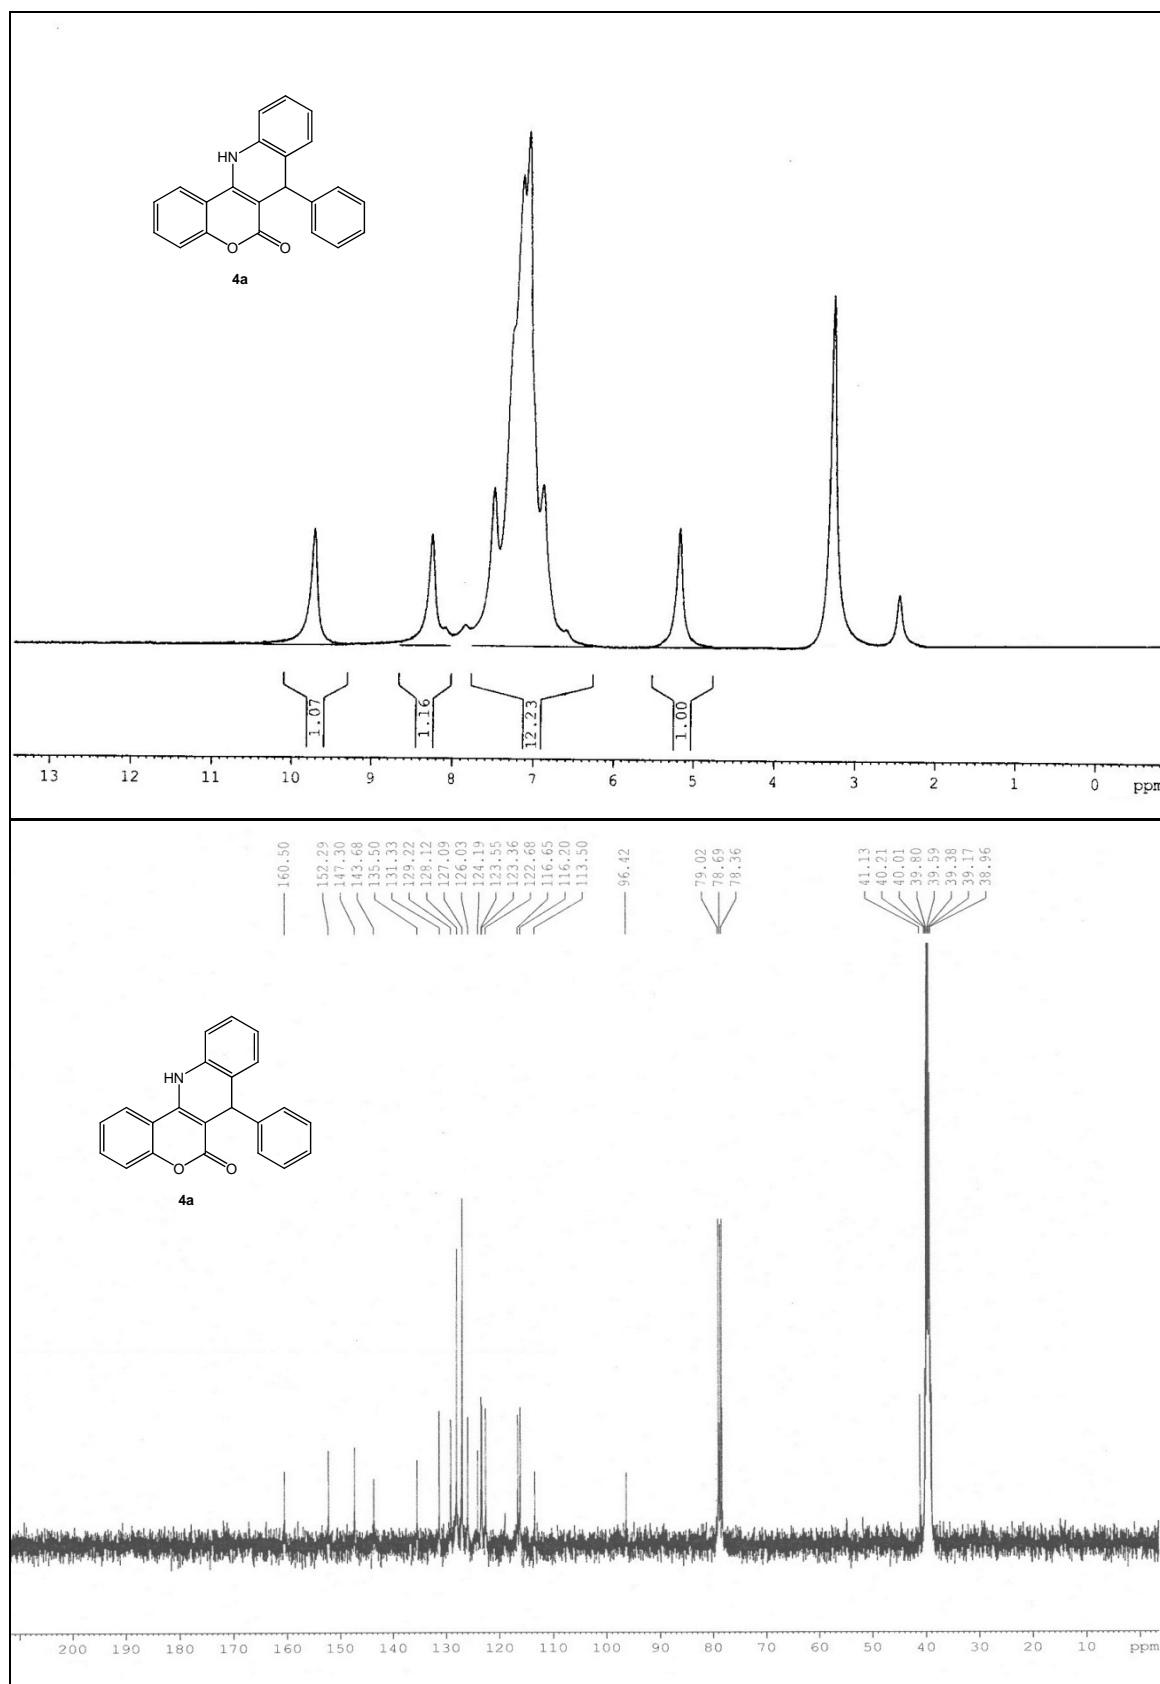

$^1\text{H}$  and  $^{13}\text{C}$  NMR spectra for **4b**

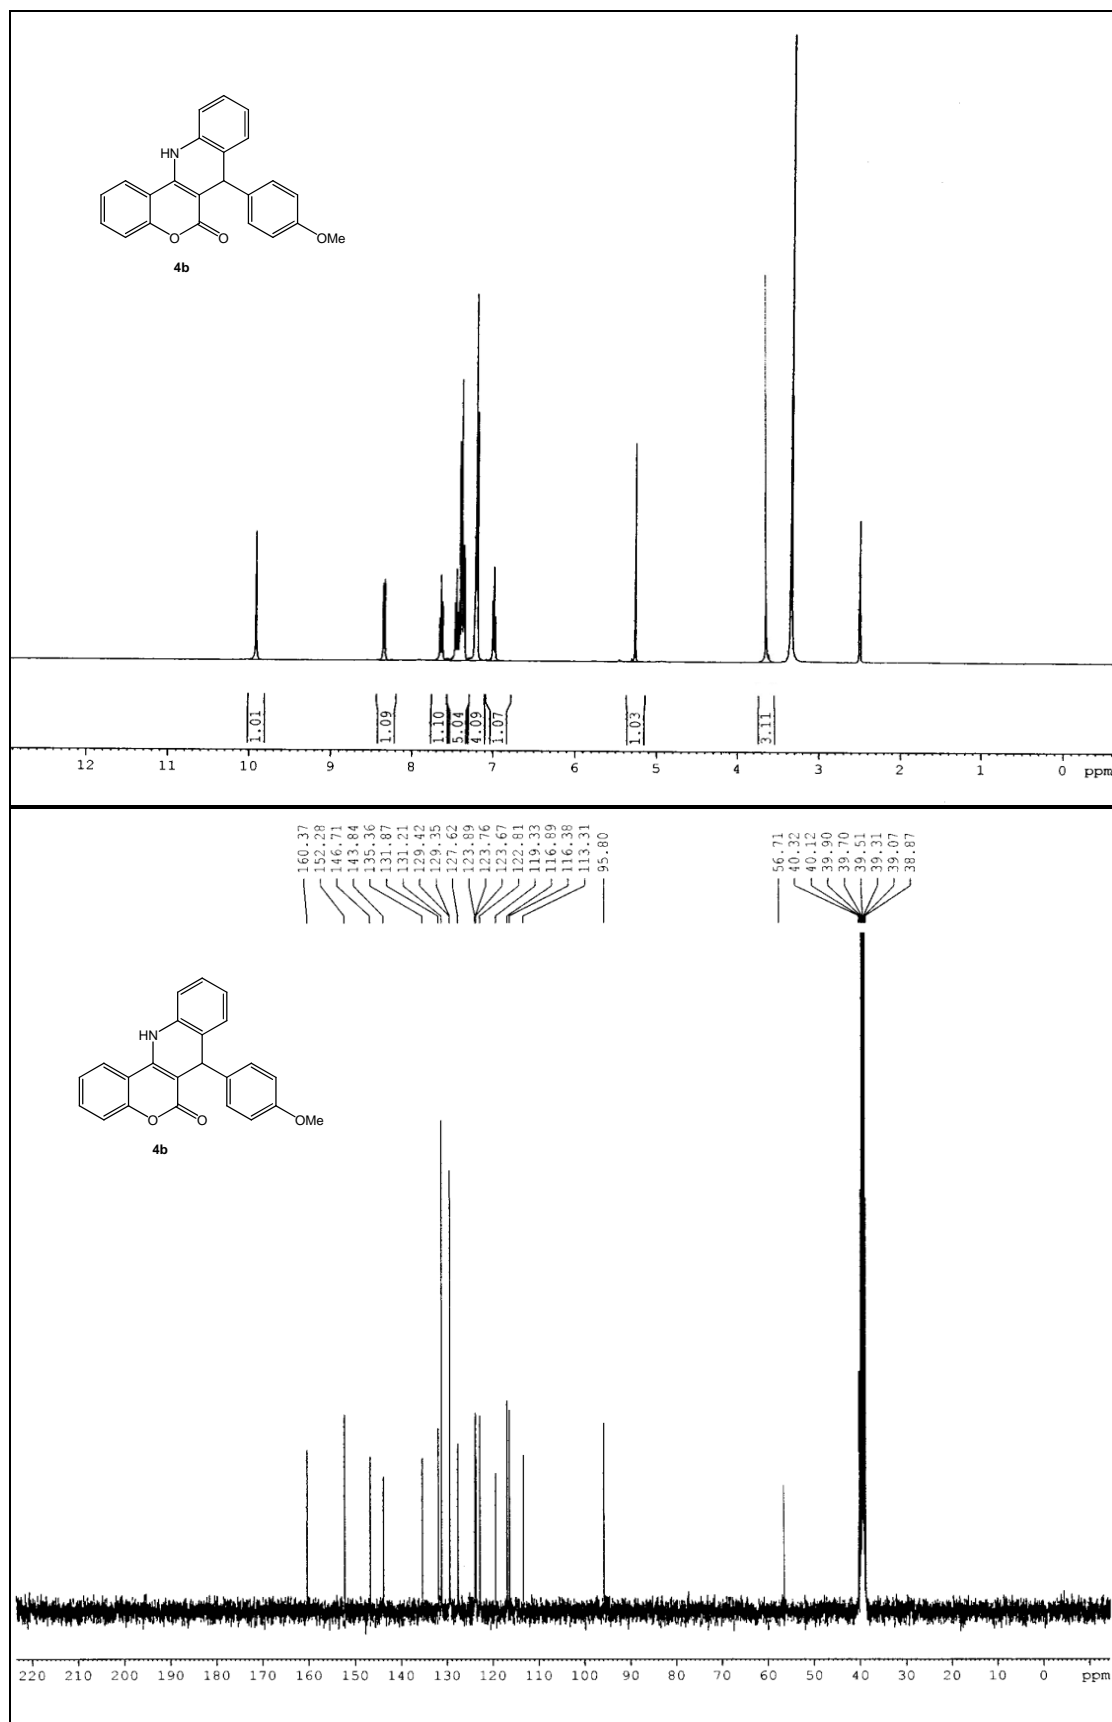



$^1\text{H}$  and  $^{13}\text{C}$  NMR spectra for **4c**

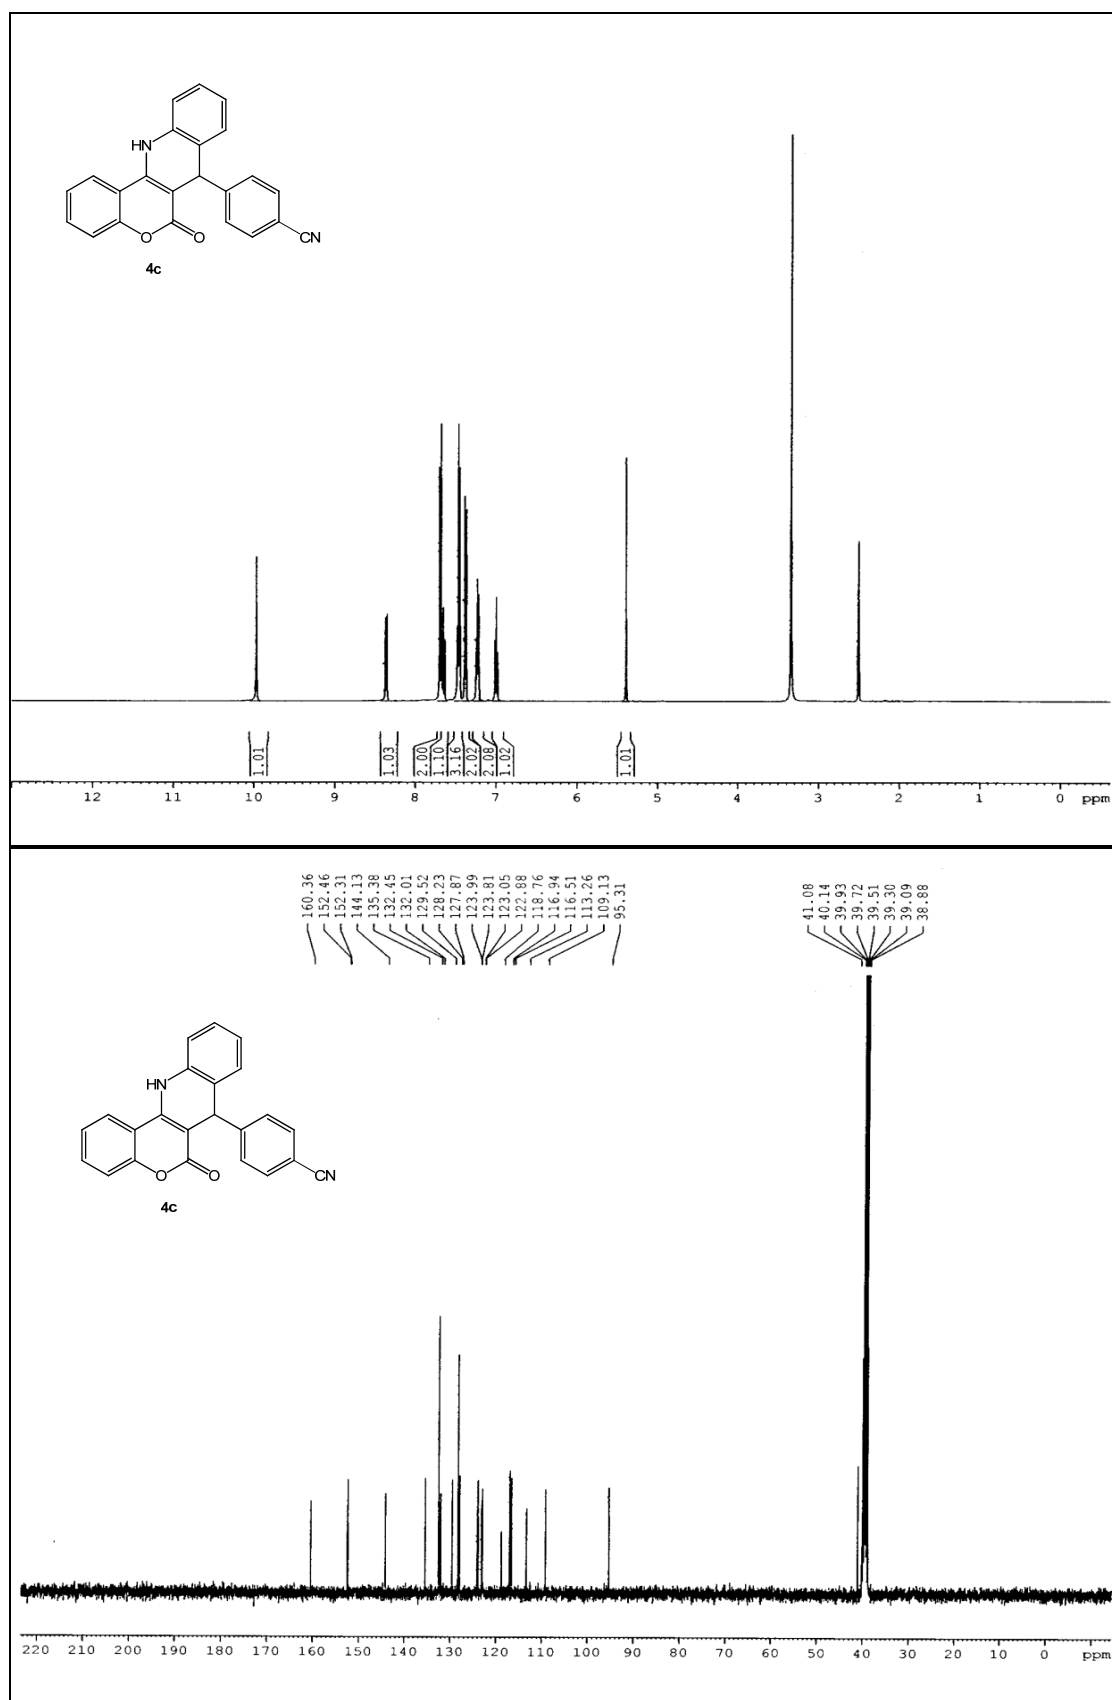

$^1\text{H}$  and  $^{13}\text{C}$  NMR spectra for **4d**

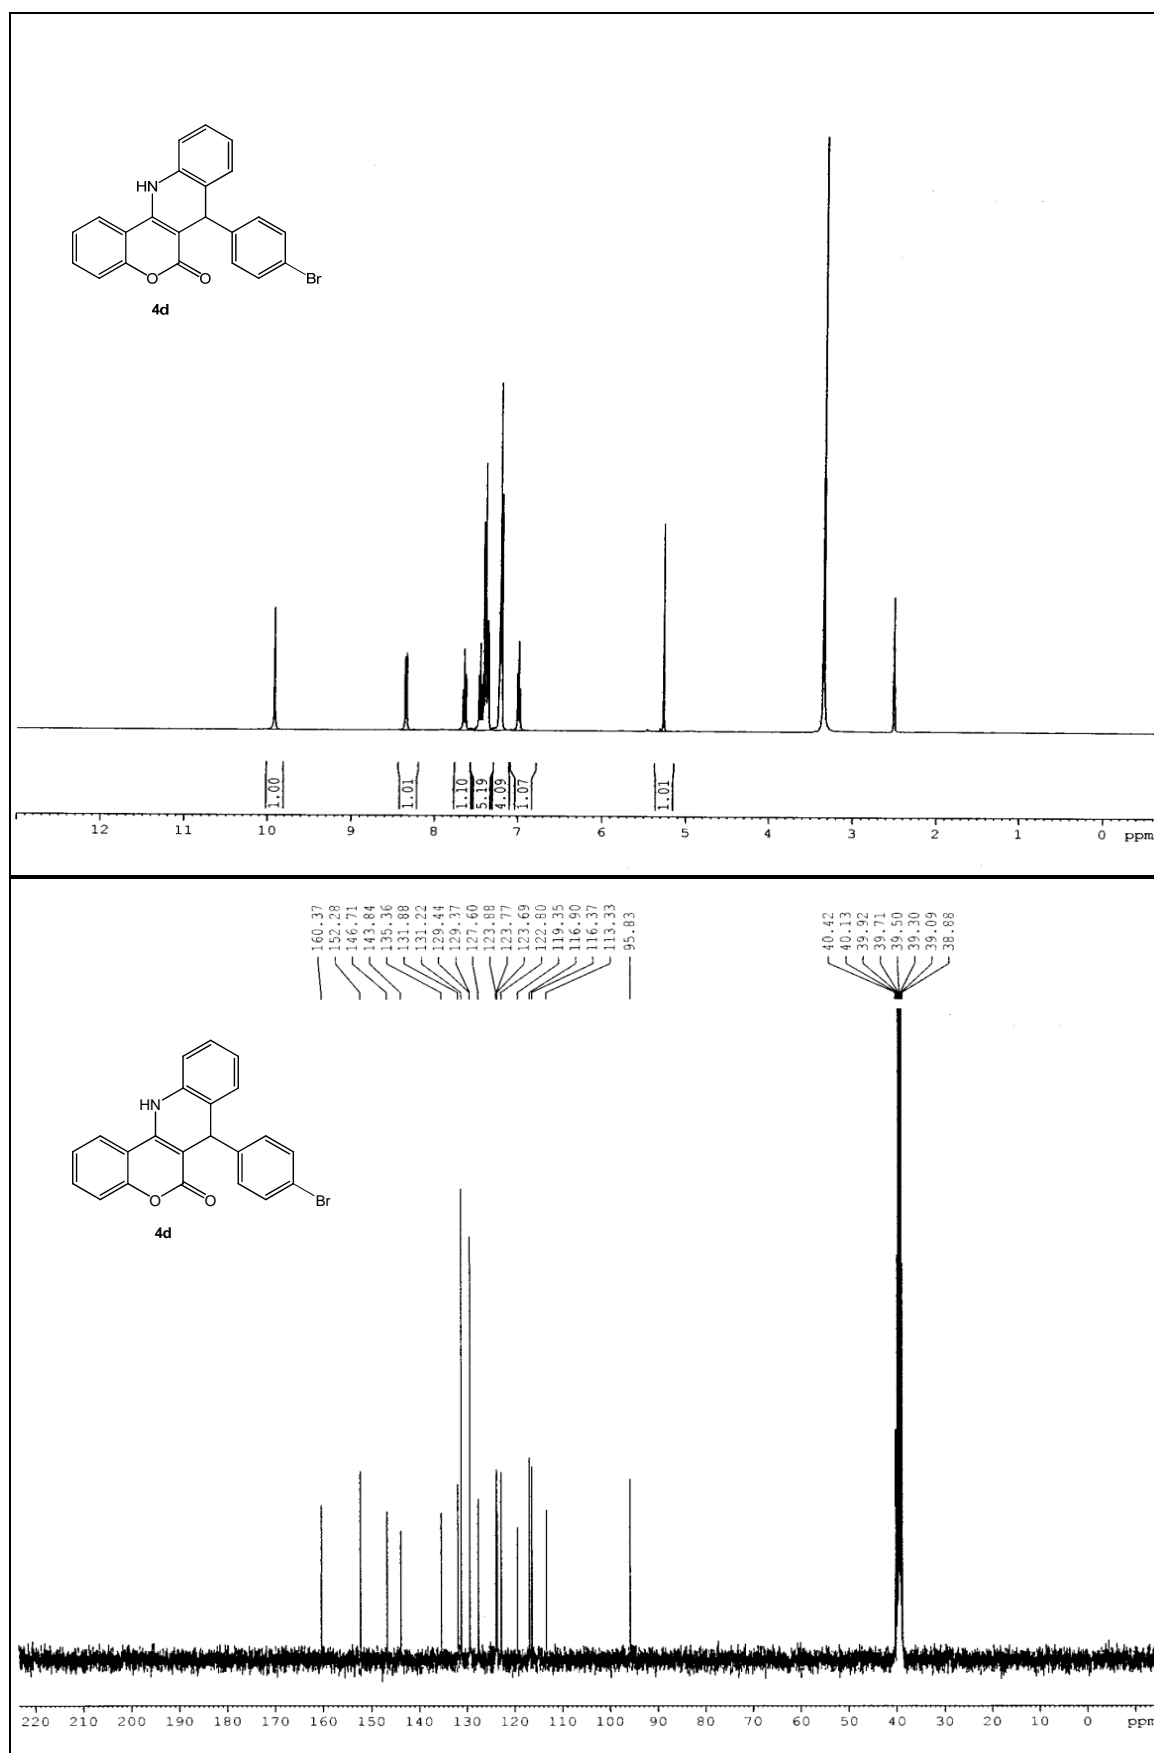

$^1\text{H}$  and  $^{13}\text{C}$  NMR spectra for **4e**

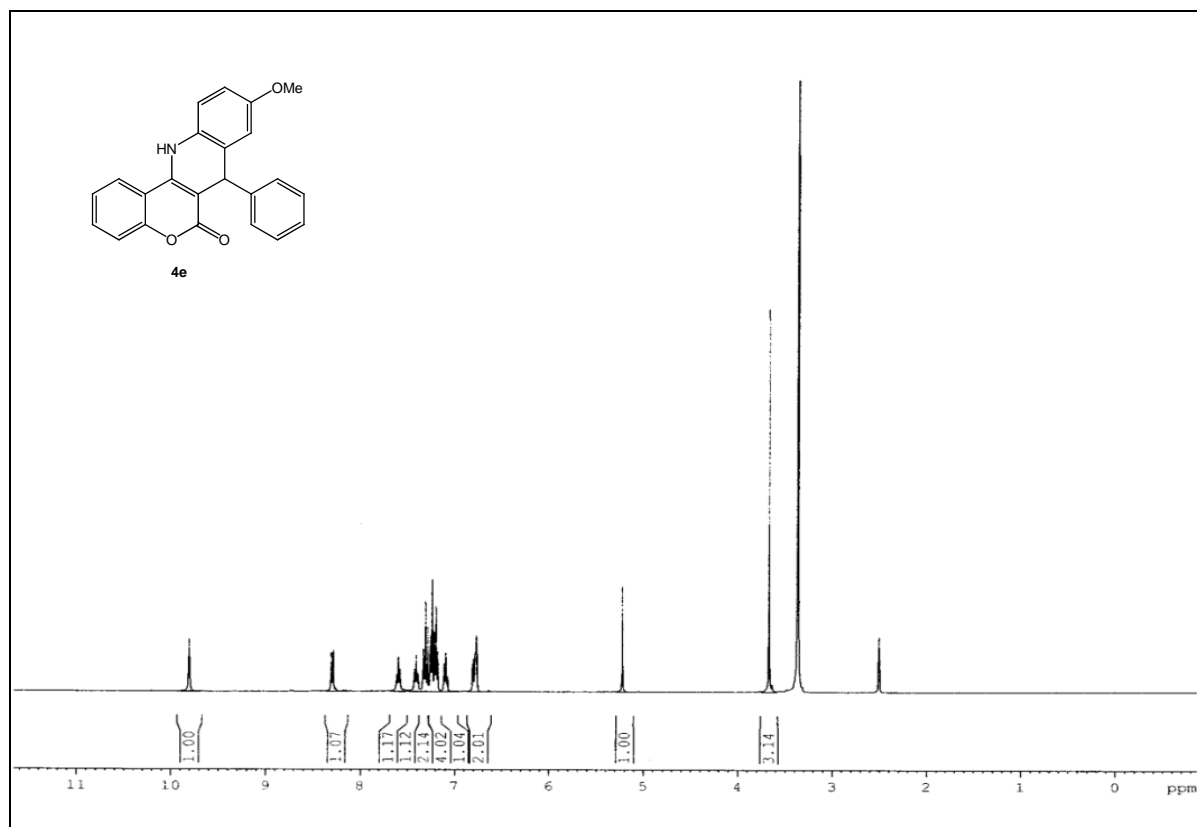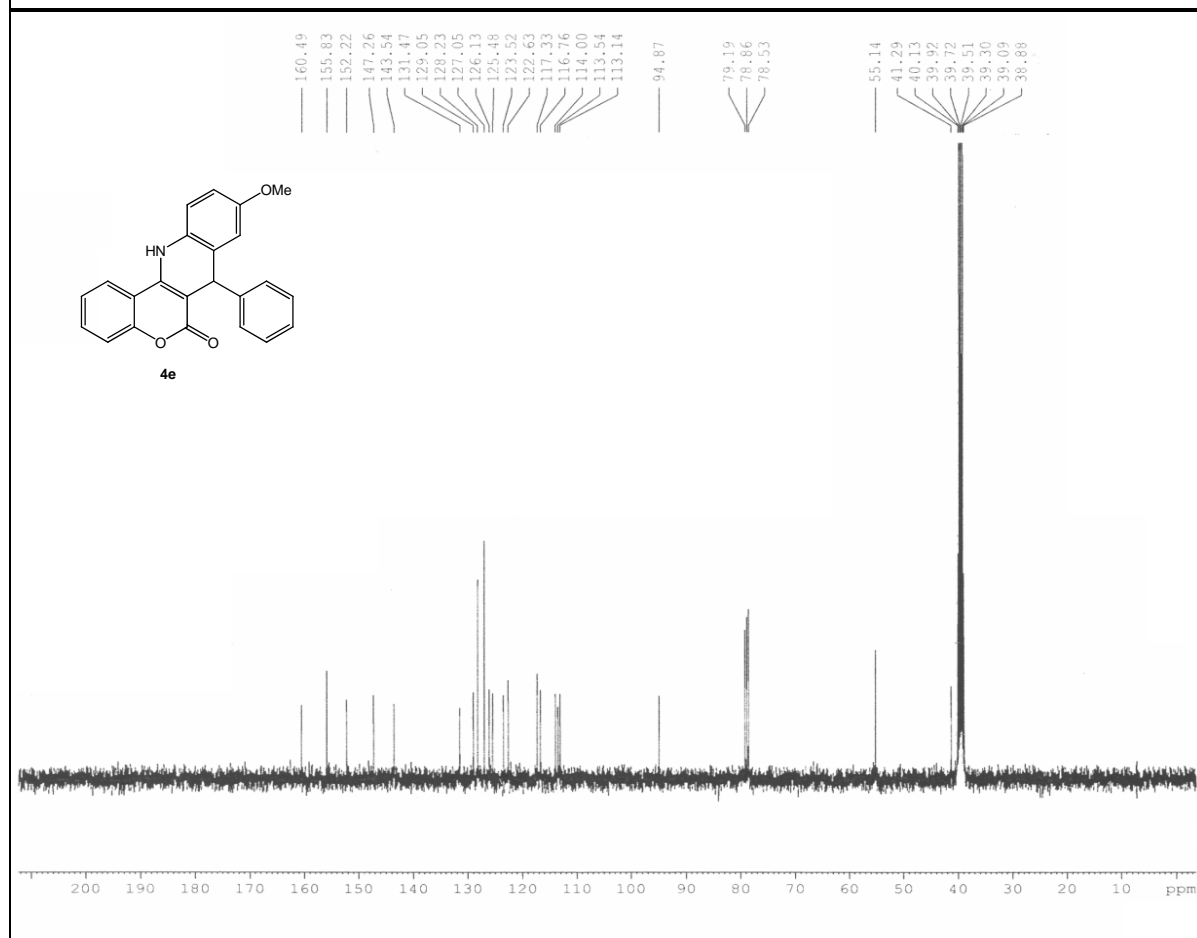

$^1\text{H}$  and  $^{13}\text{C}$  NMR spectra for **4f**

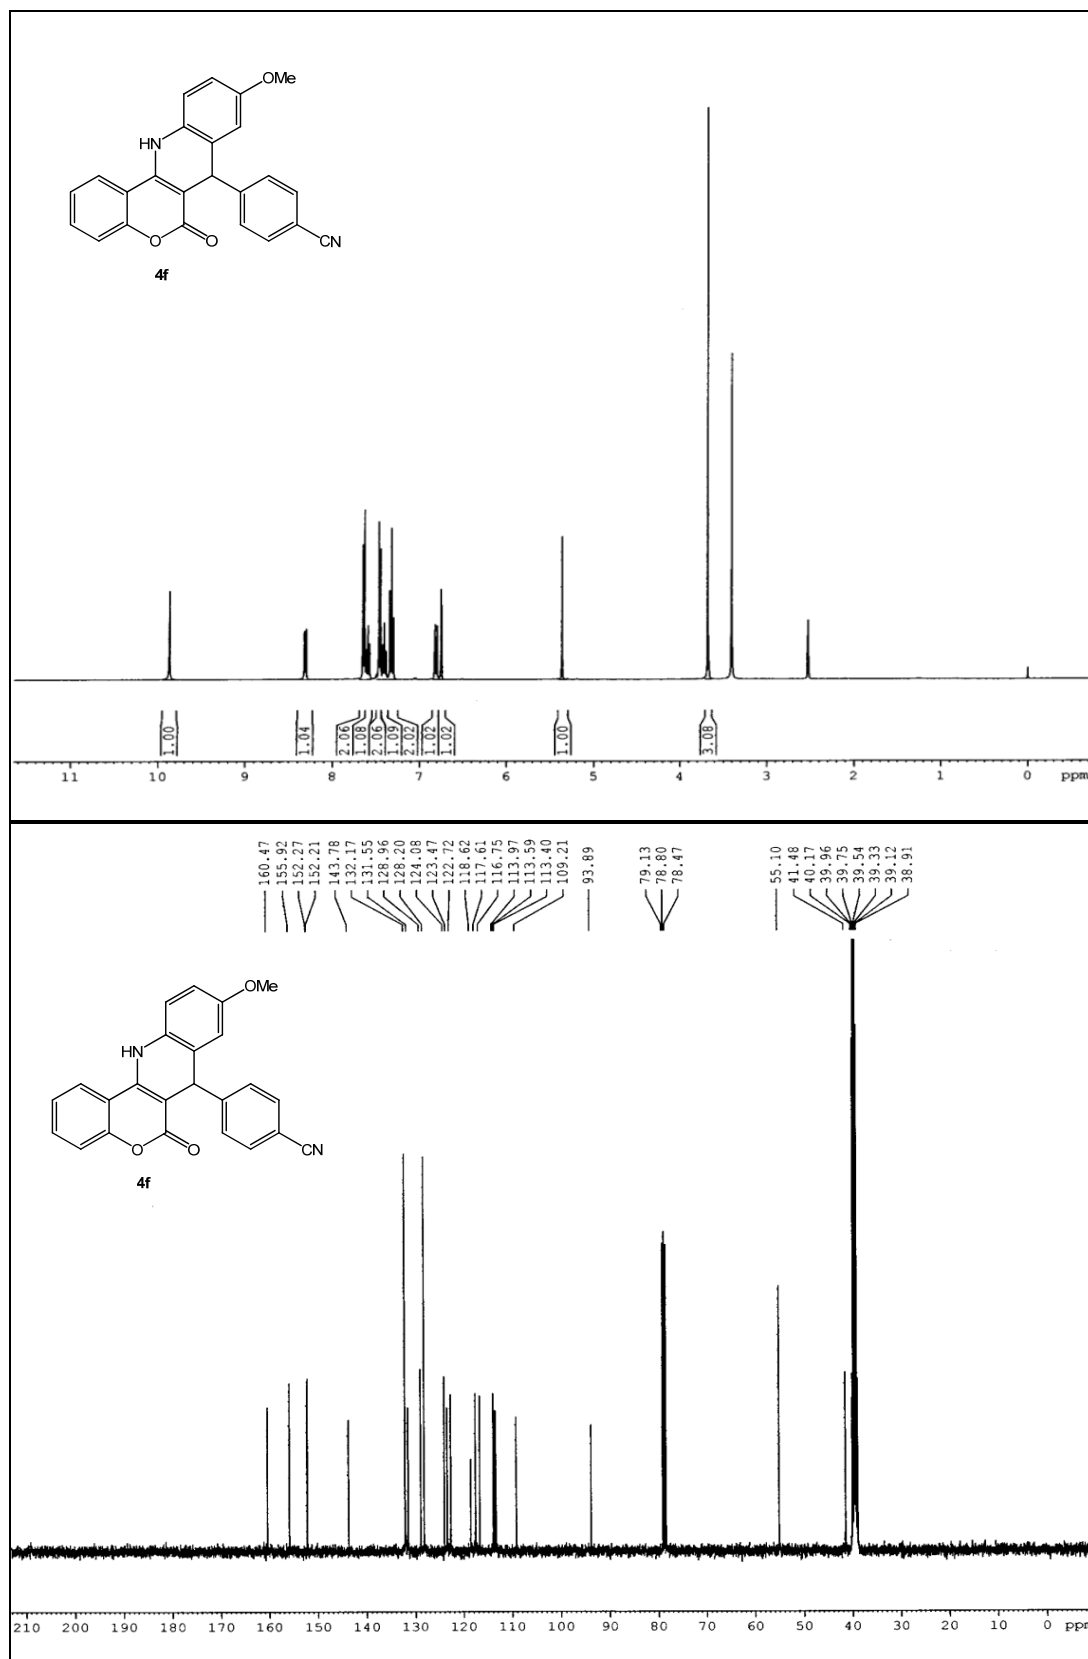

$^1\text{H}$  and  $^{13}\text{C}$  NMR spectra for **4g**

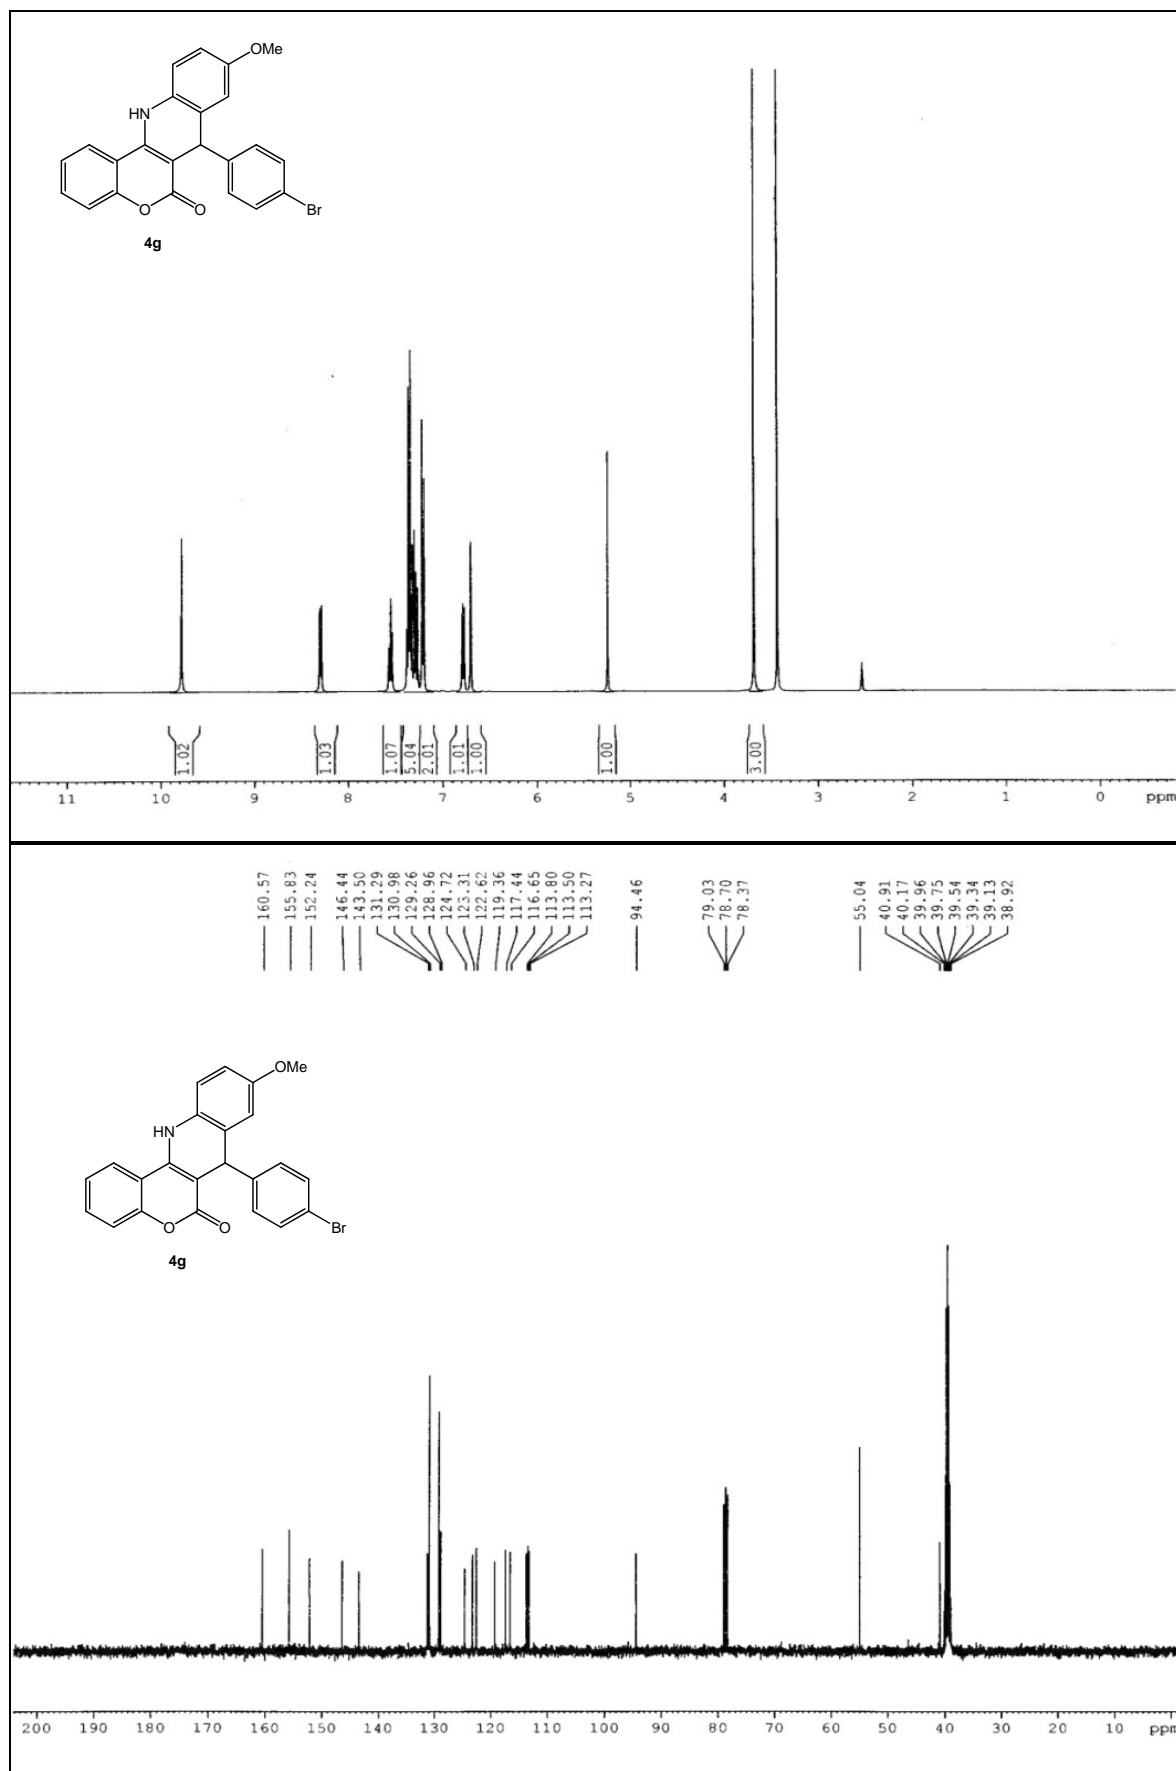

$^1\text{H}$  and  $^{13}\text{C}$  NMR spectra for **4h**

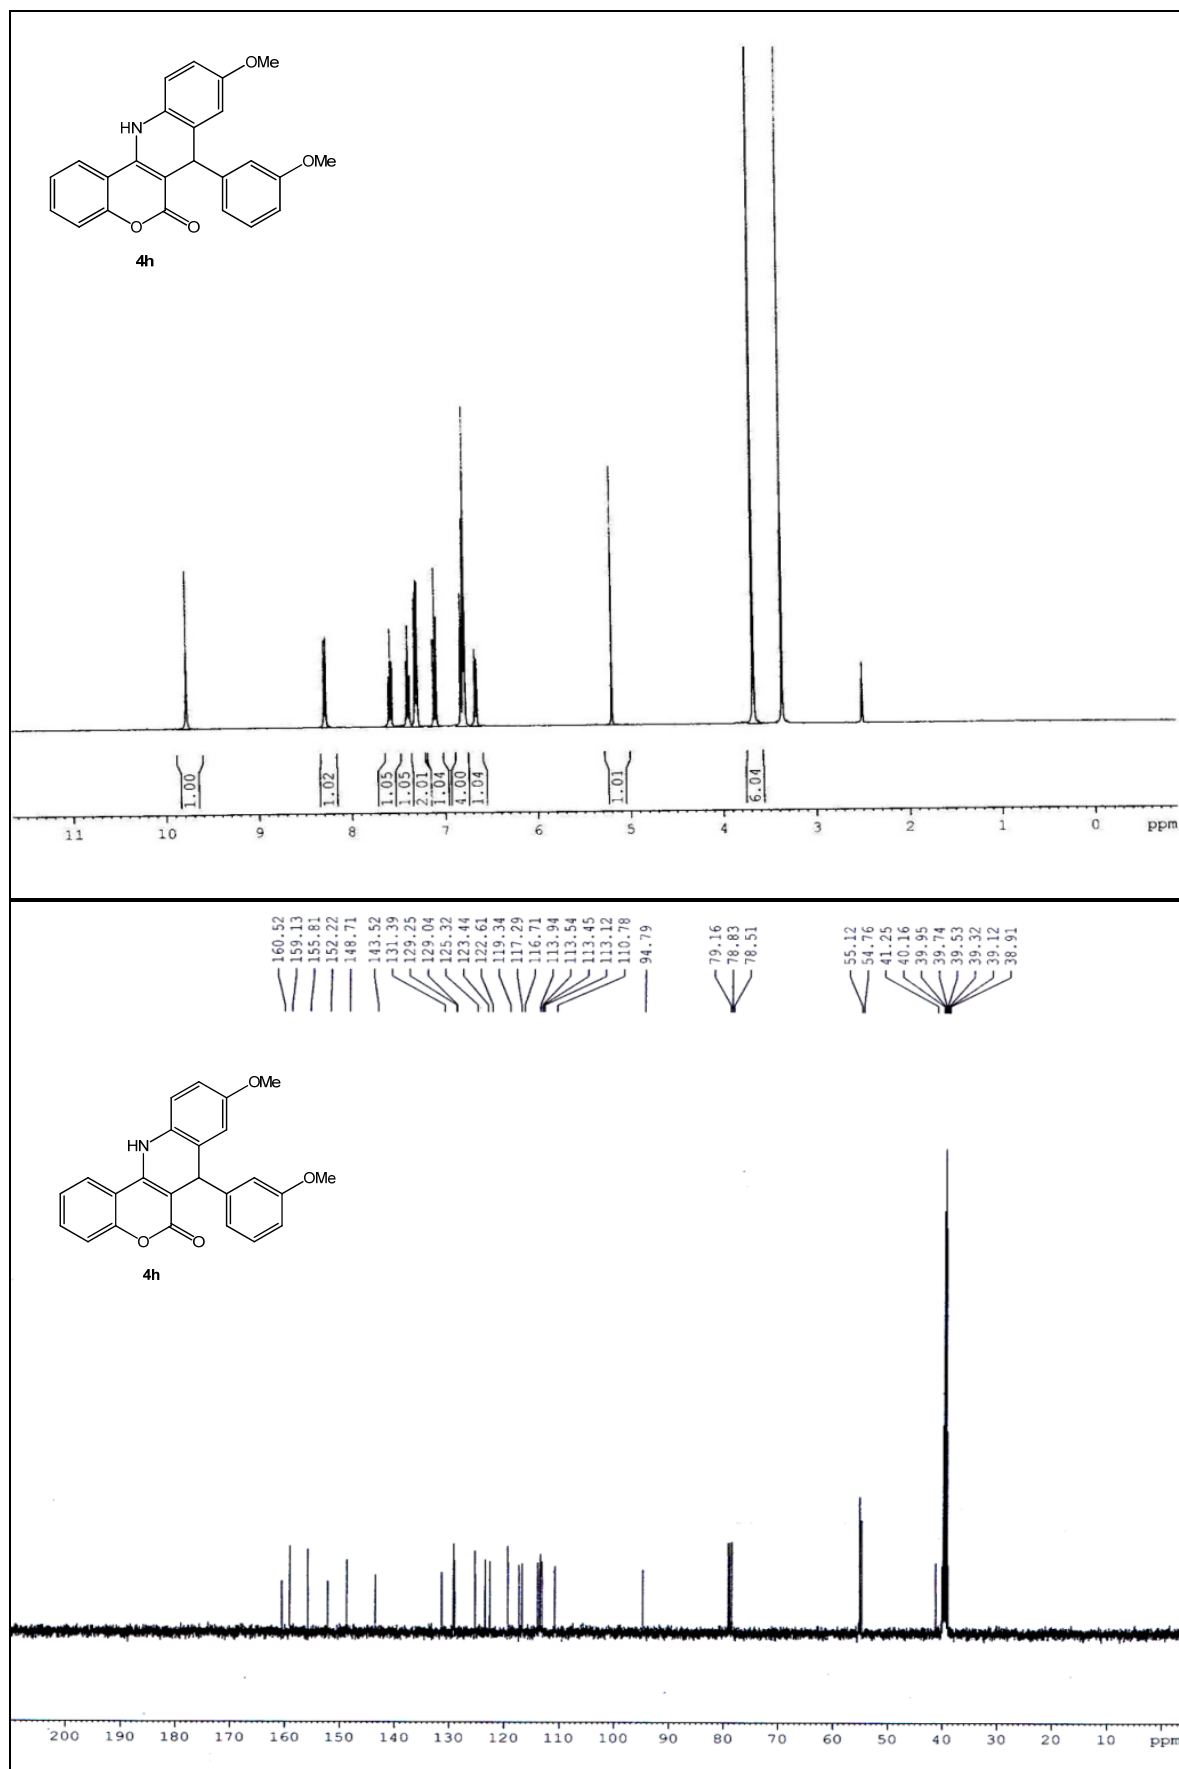

$^1\text{H}$  and  $^{13}\text{C}$  NMR spectra for **4i**

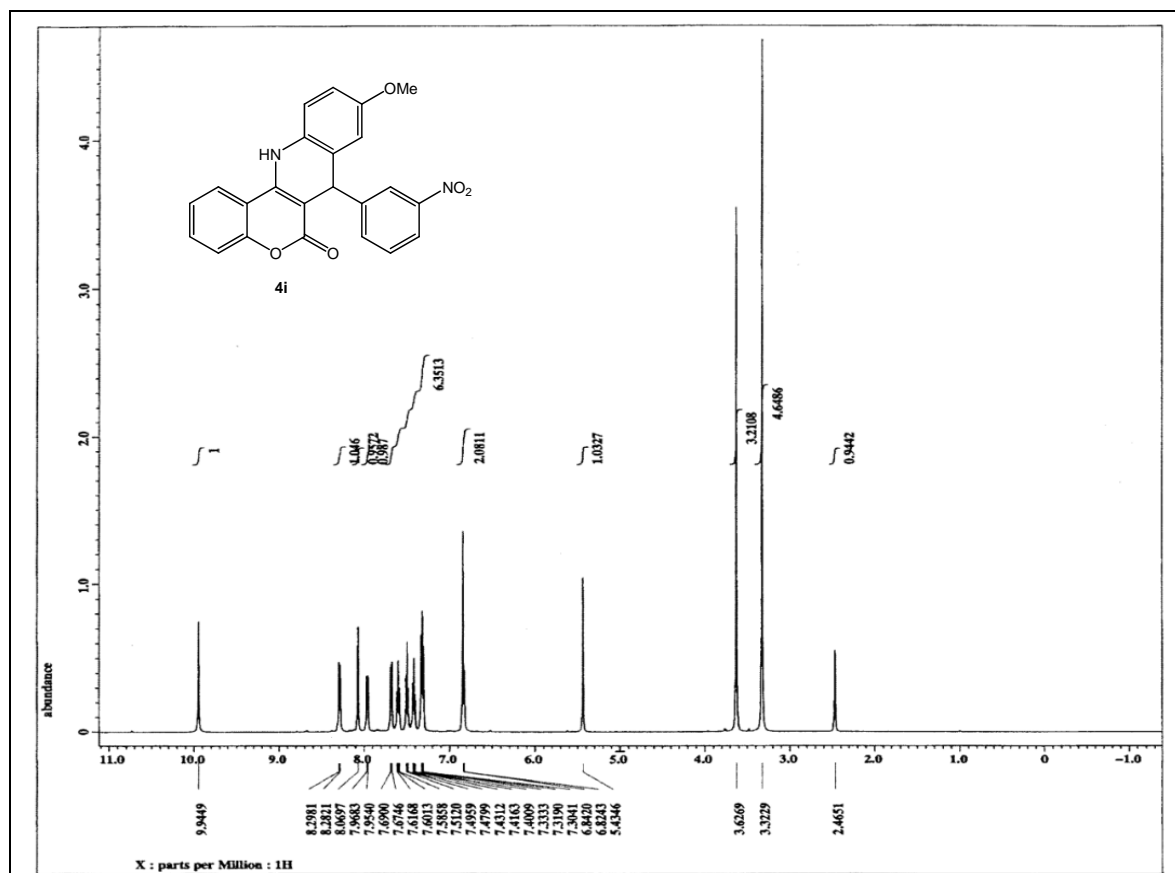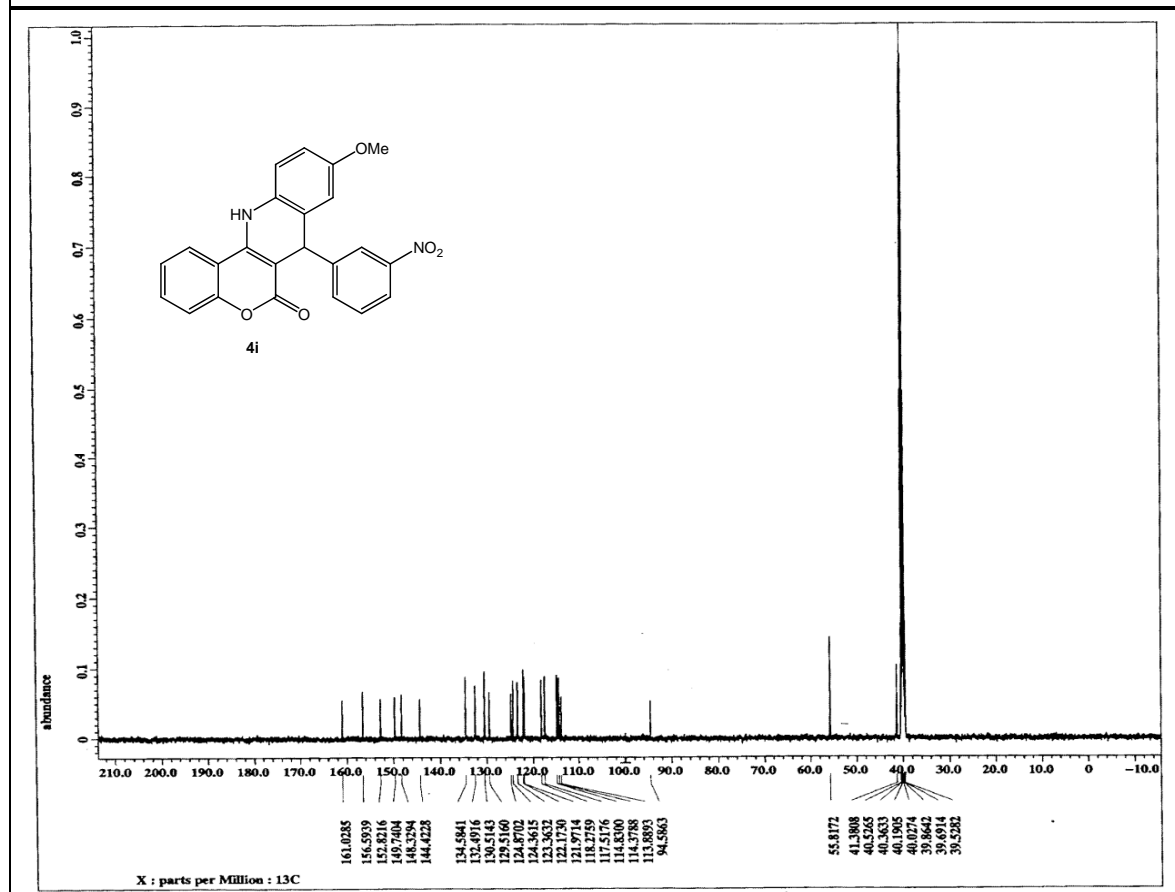

$^1\text{H}$  and  $^{13}\text{C}$  NMR spectra for **4j**

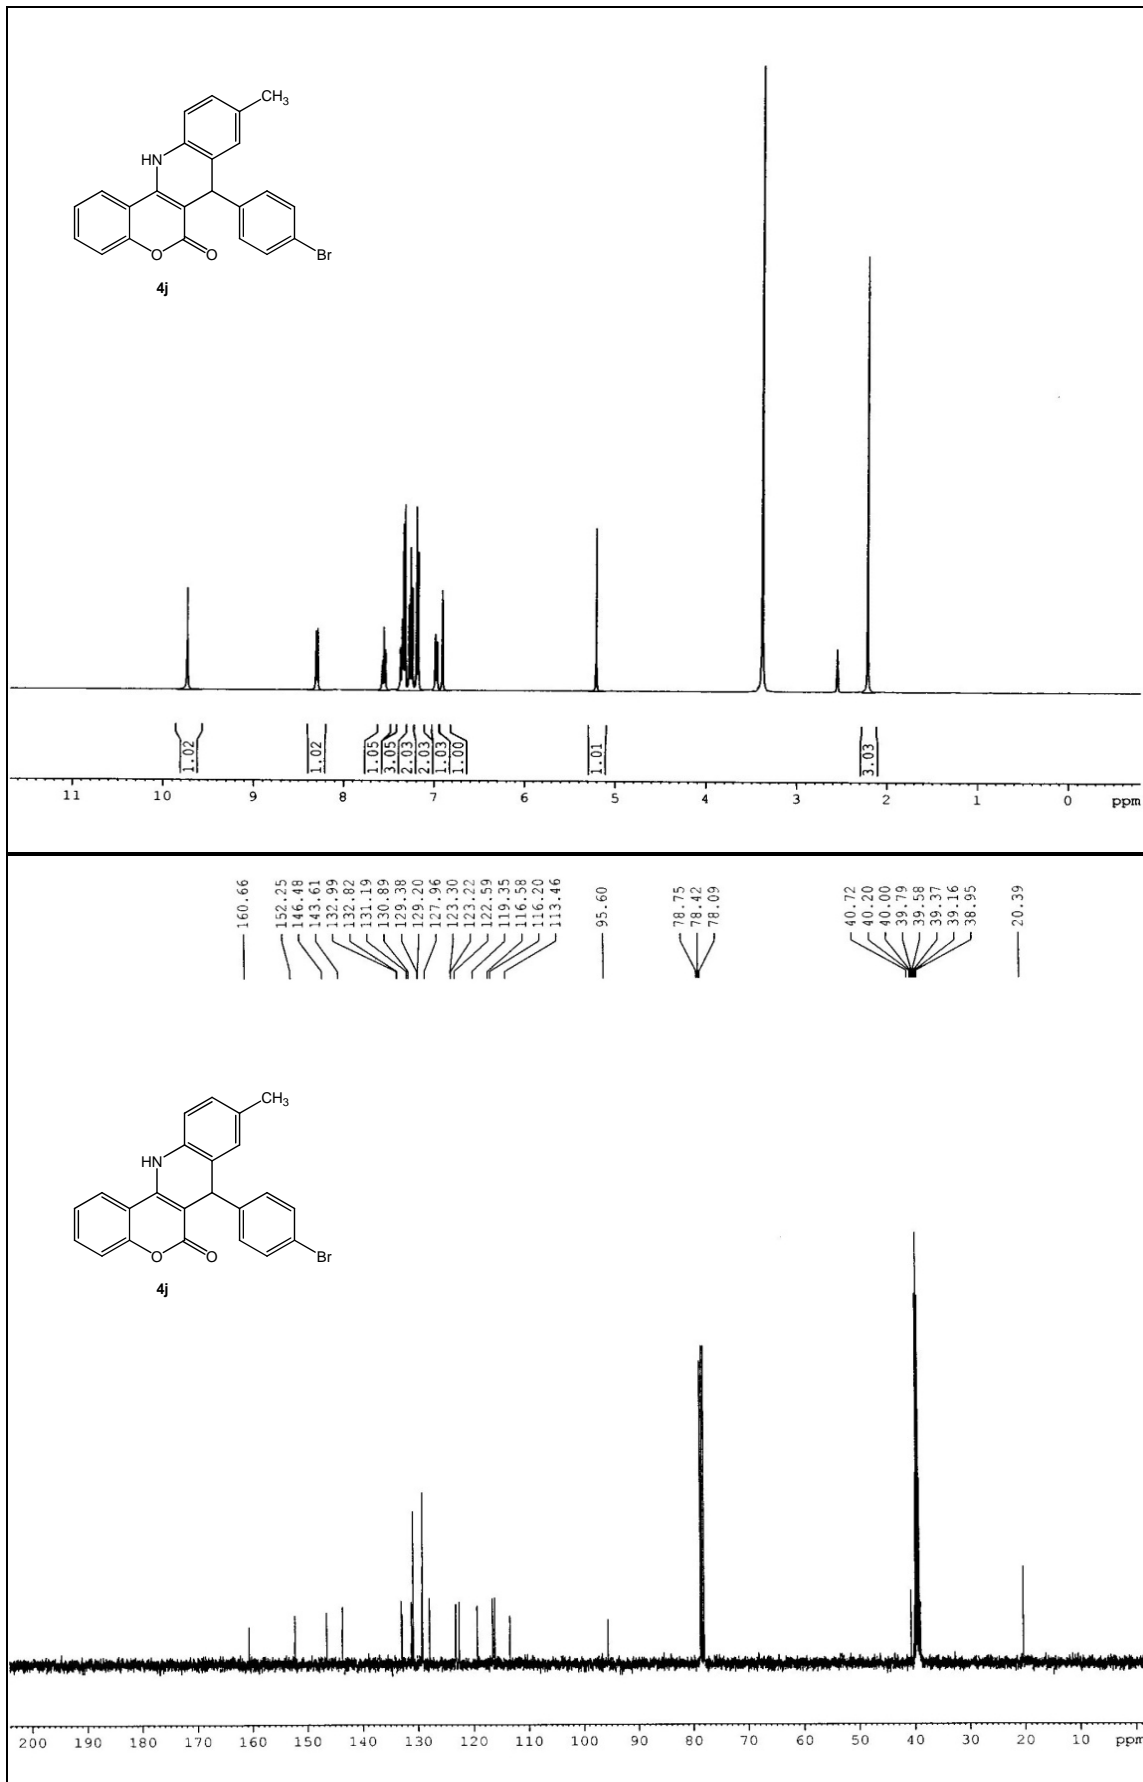



$^1\text{H}$  and  $^{13}\text{C}$  NMR spectra for **4k**

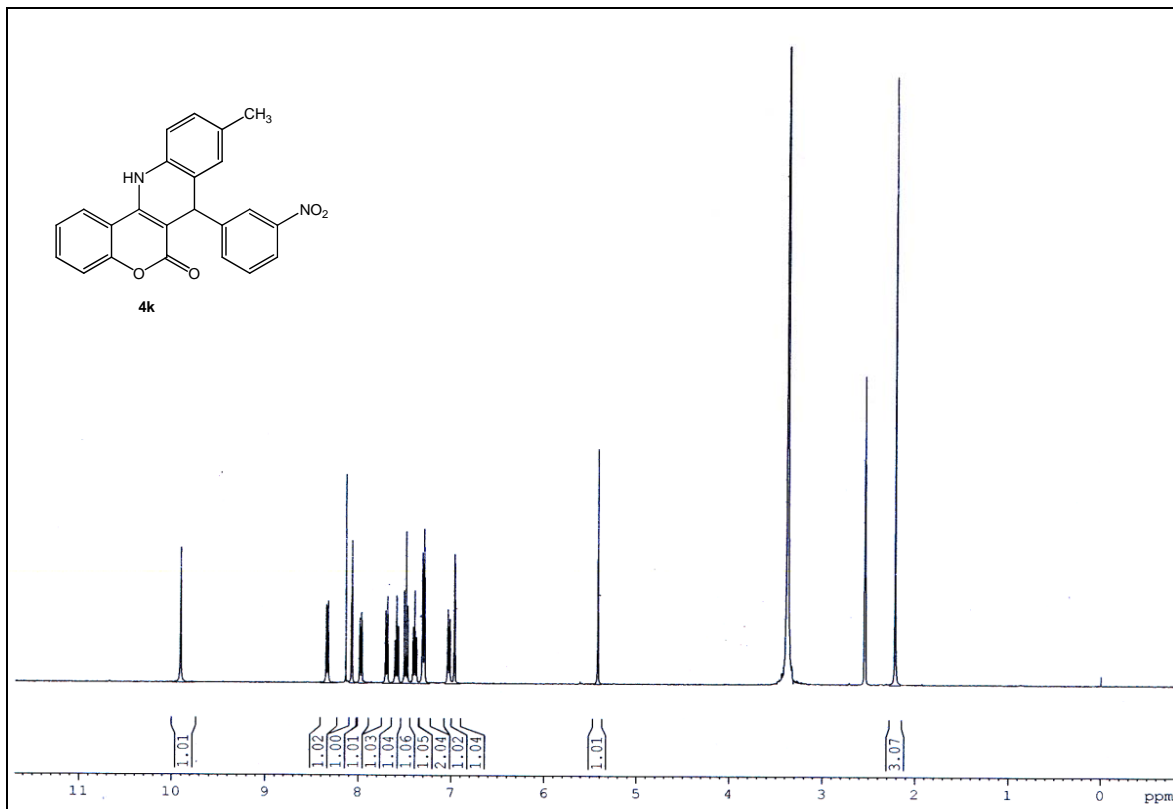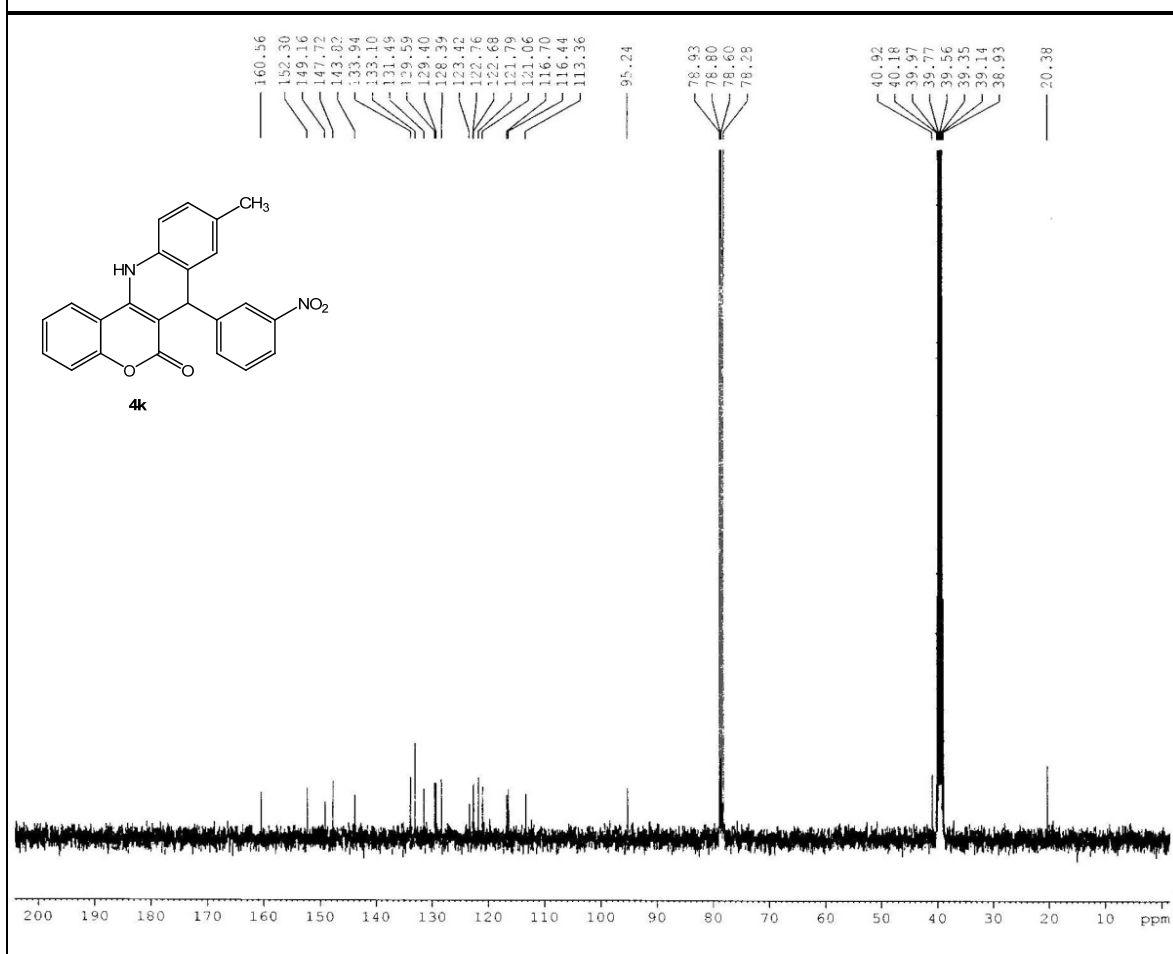

$^1\text{H}$  and  $^{13}\text{C}$  NMR spectra for **4I**

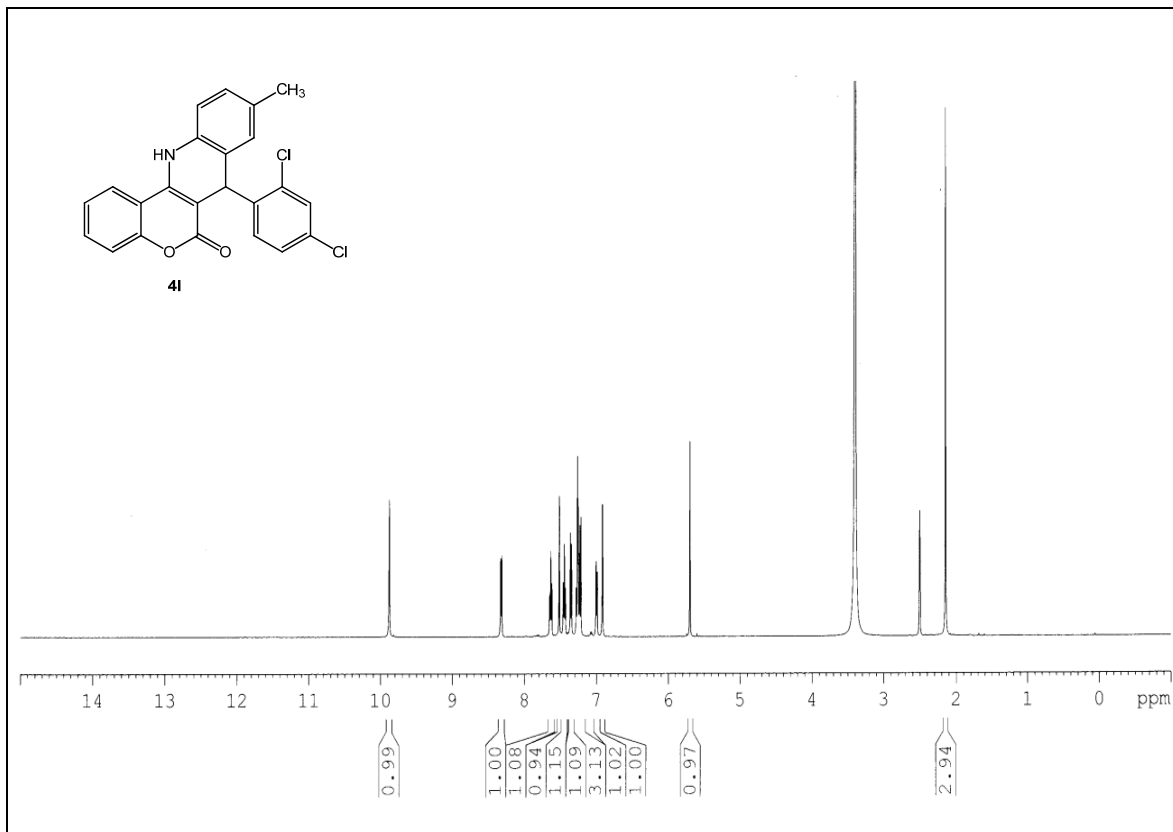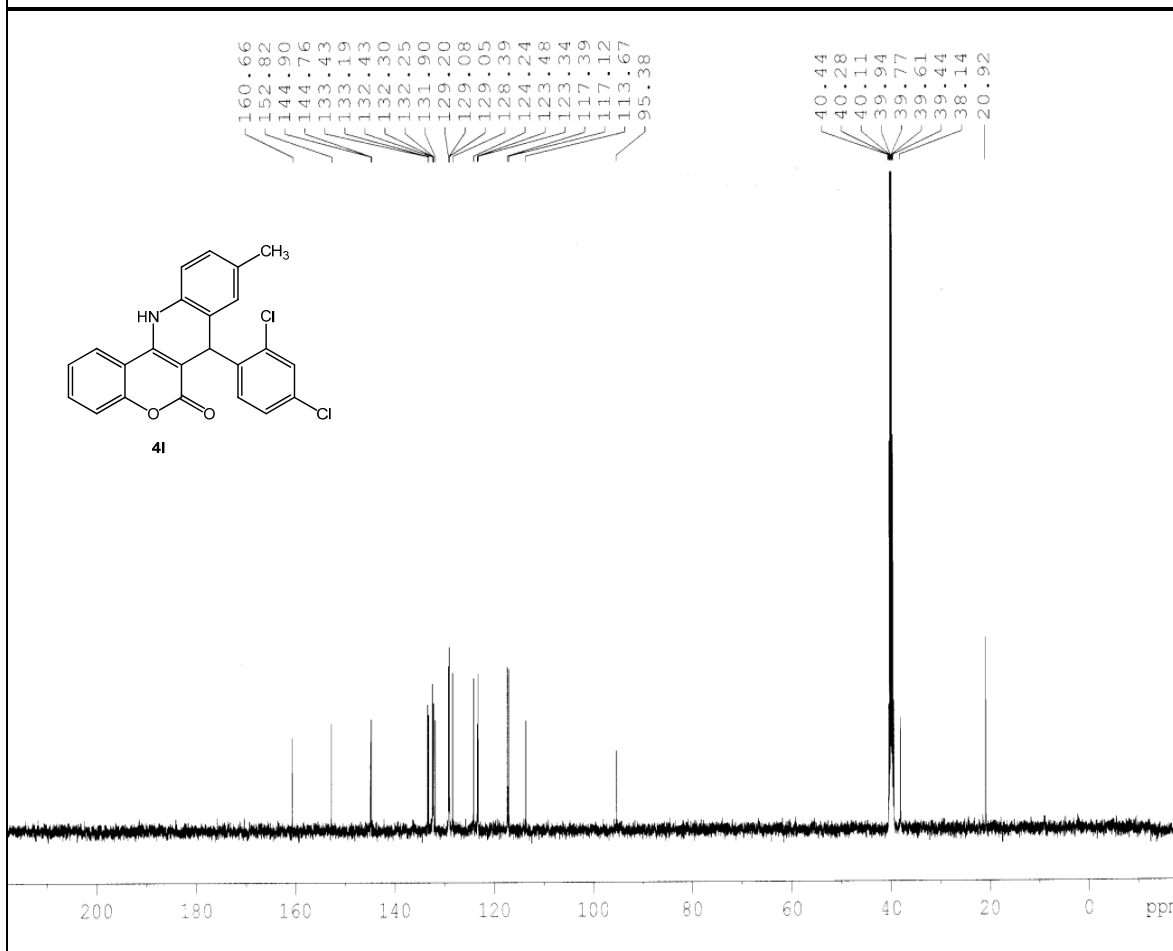

$^1\text{H}$  and  $^{13}\text{C}$  NMR spectra for **4m**

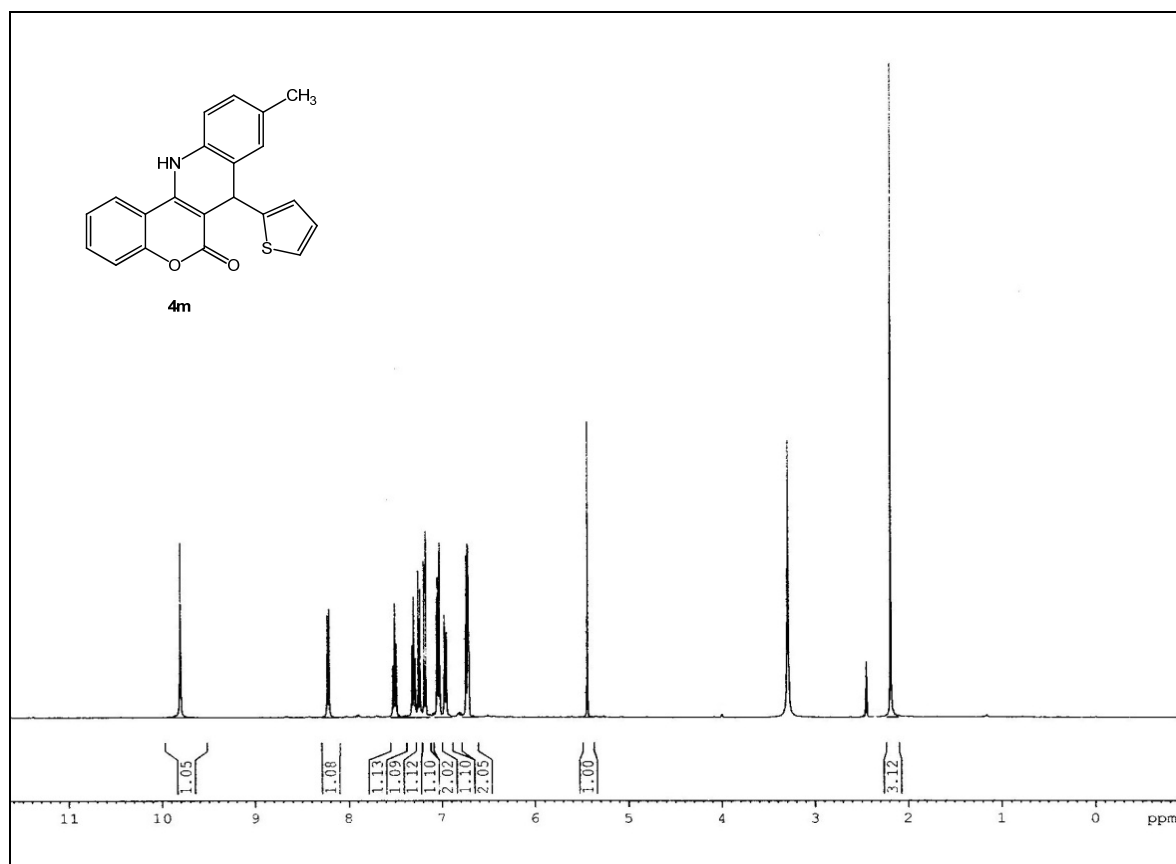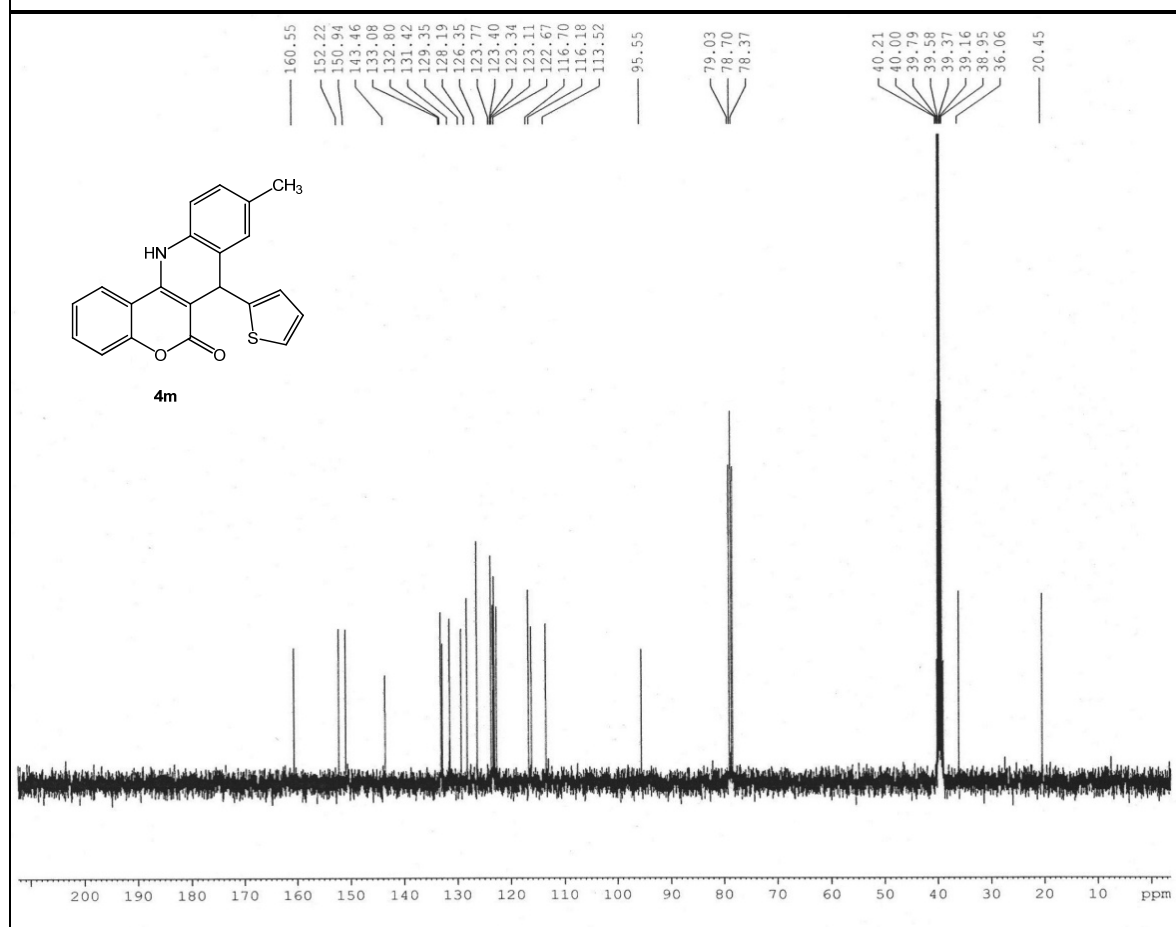

$^1\text{H}$  and  $^{13}\text{C}$  NMR spectra for **4n**

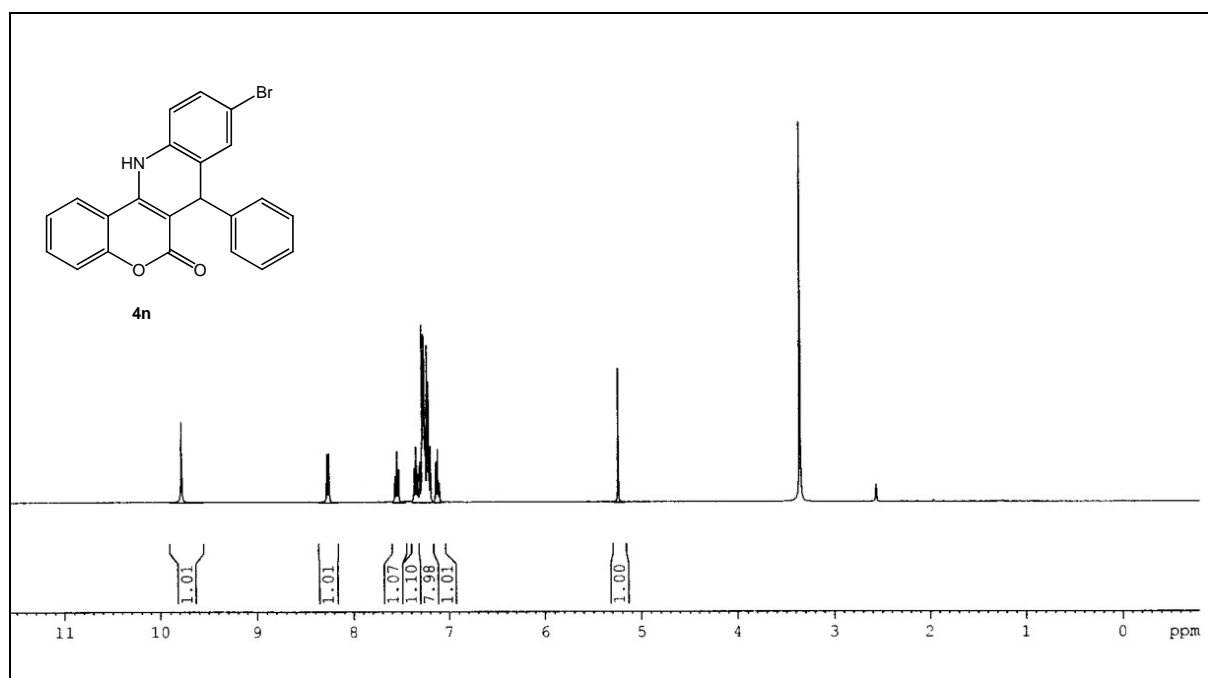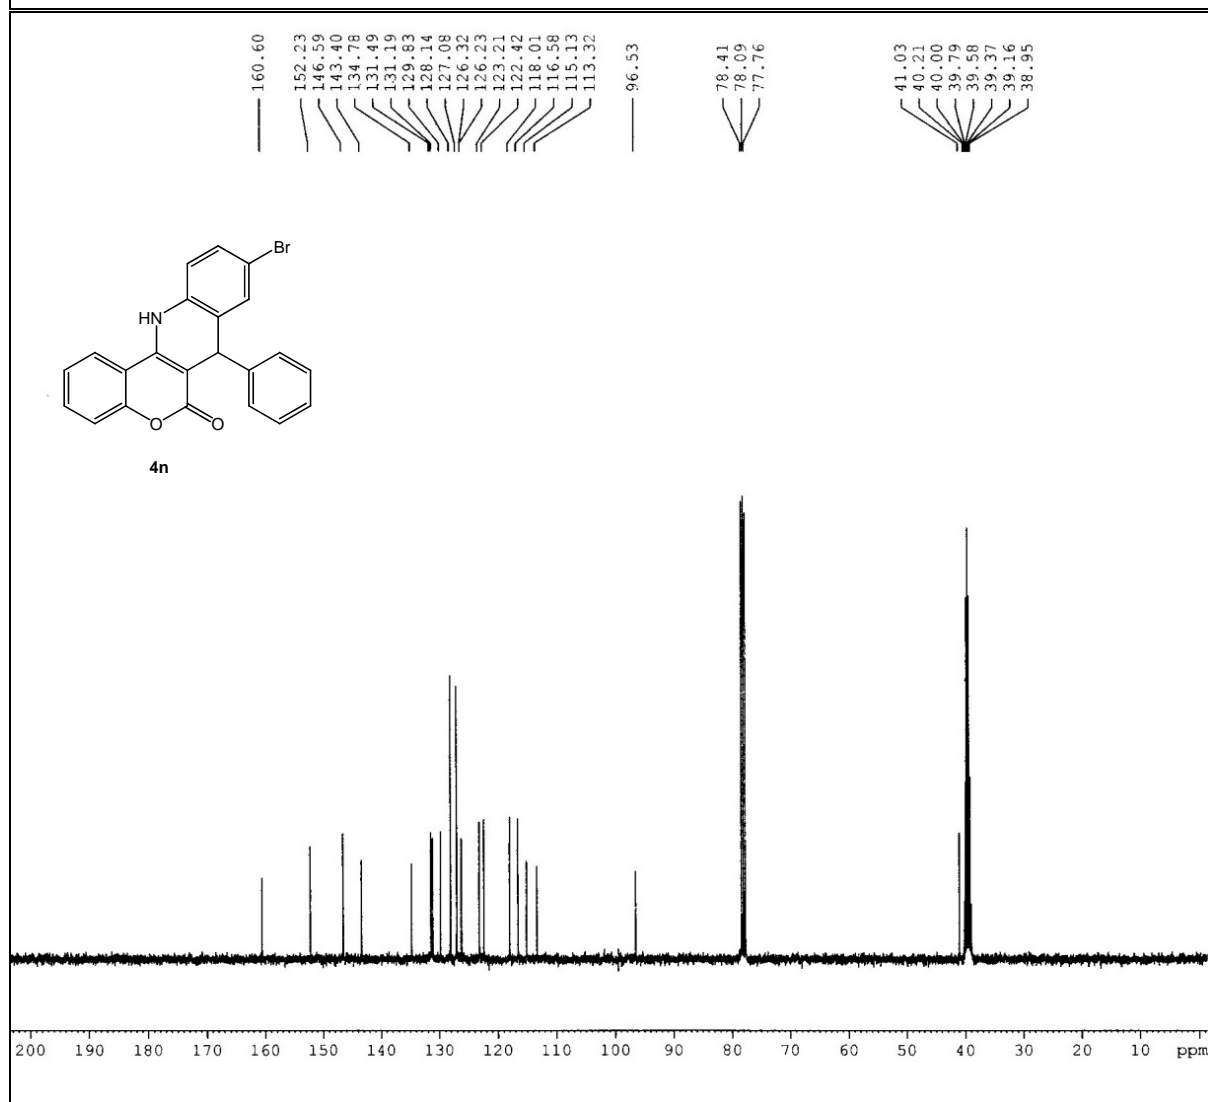

$^1\text{H}$  and  $^{13}\text{C}$  NMR spectra for **4o**

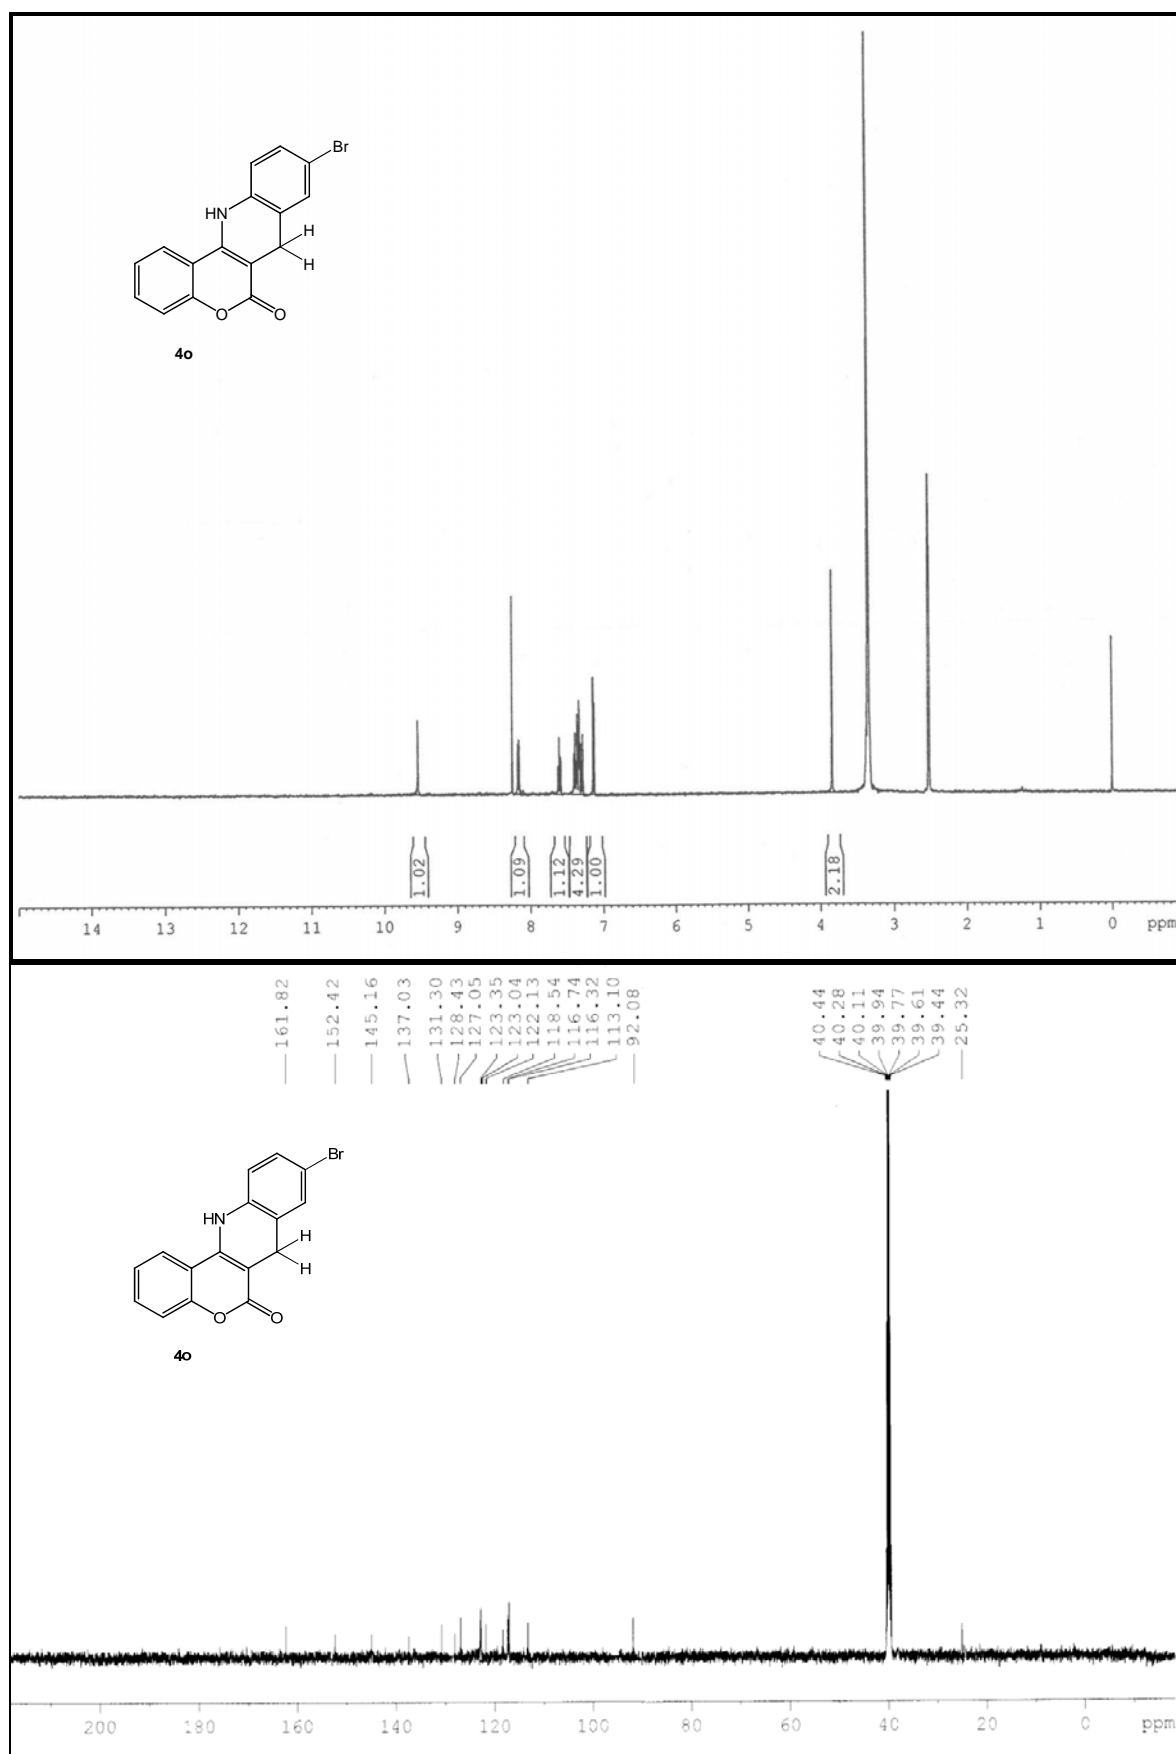

$^1\text{H}$  and  $^{13}\text{C}$  NMR spectra for **4p**

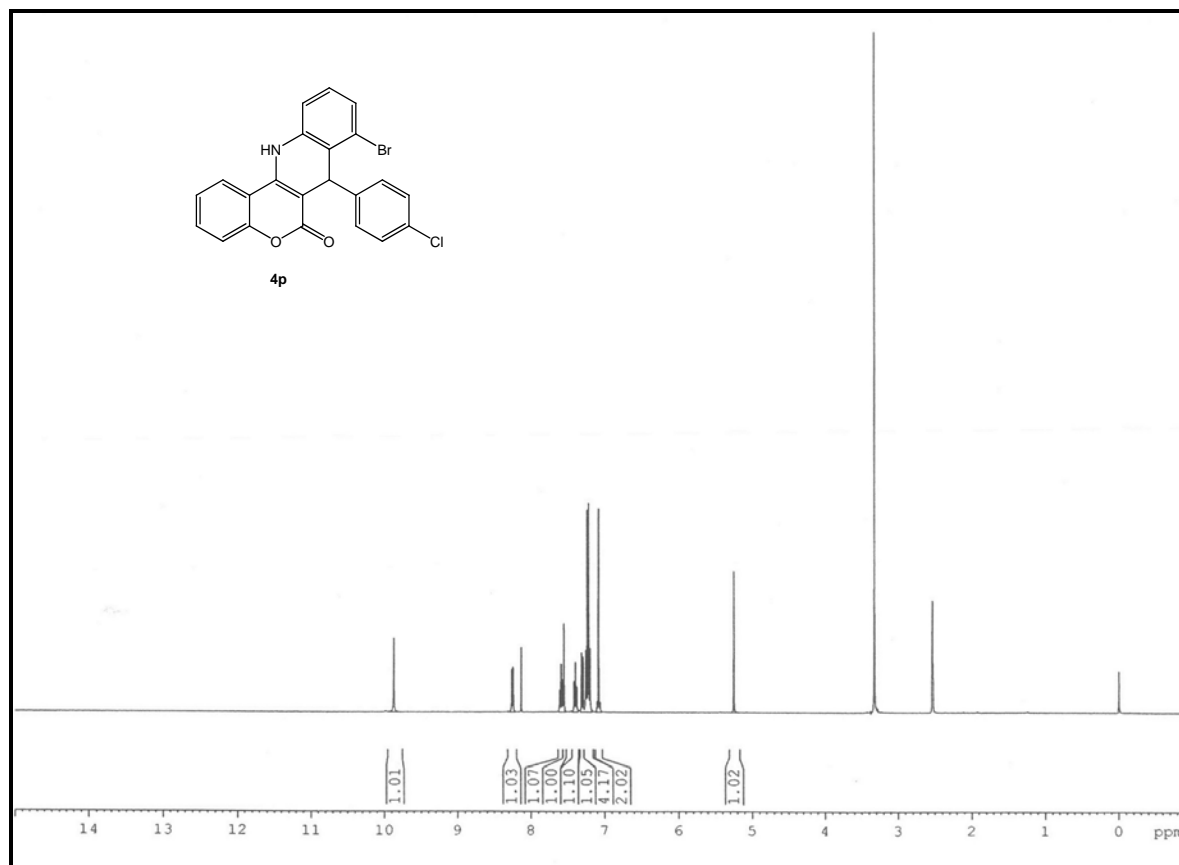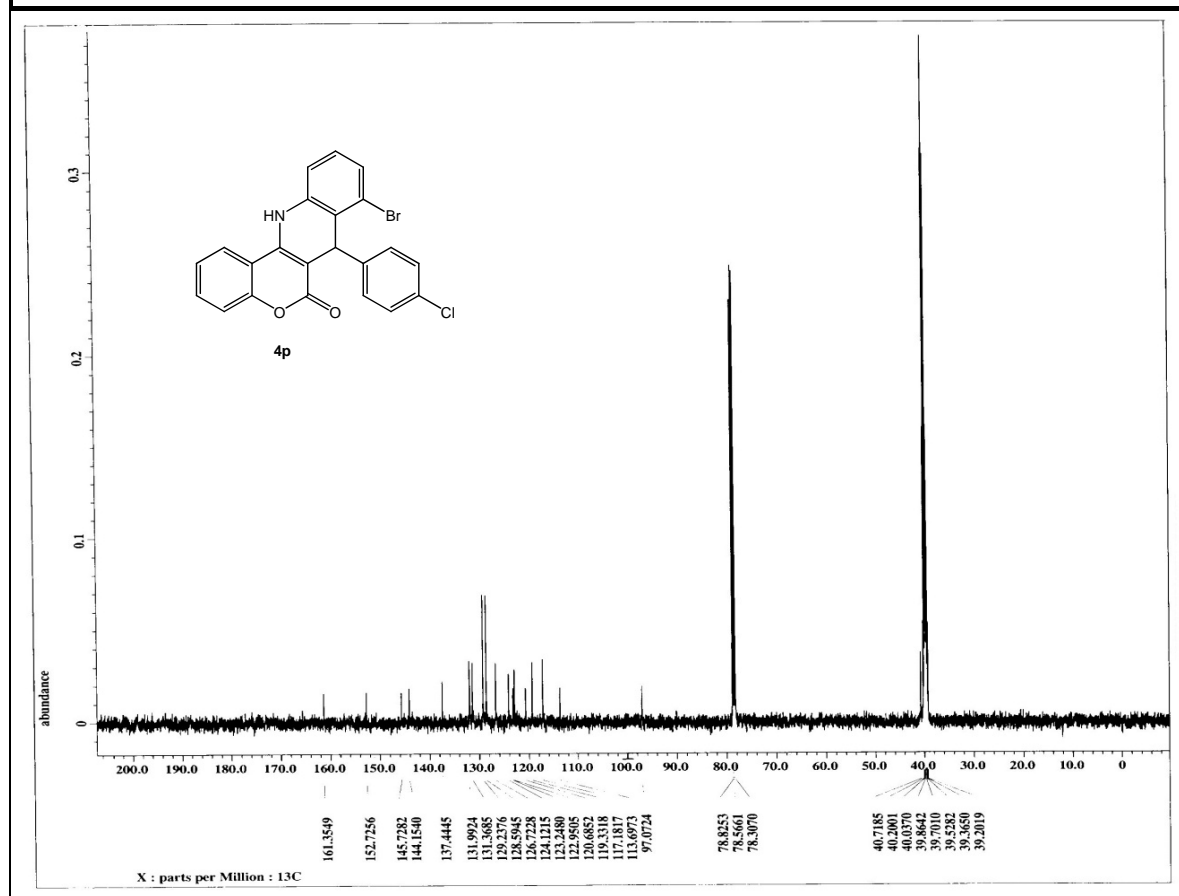

$^1\text{H}$  and  $^{13}\text{C}$  NMR spectra for **4q**

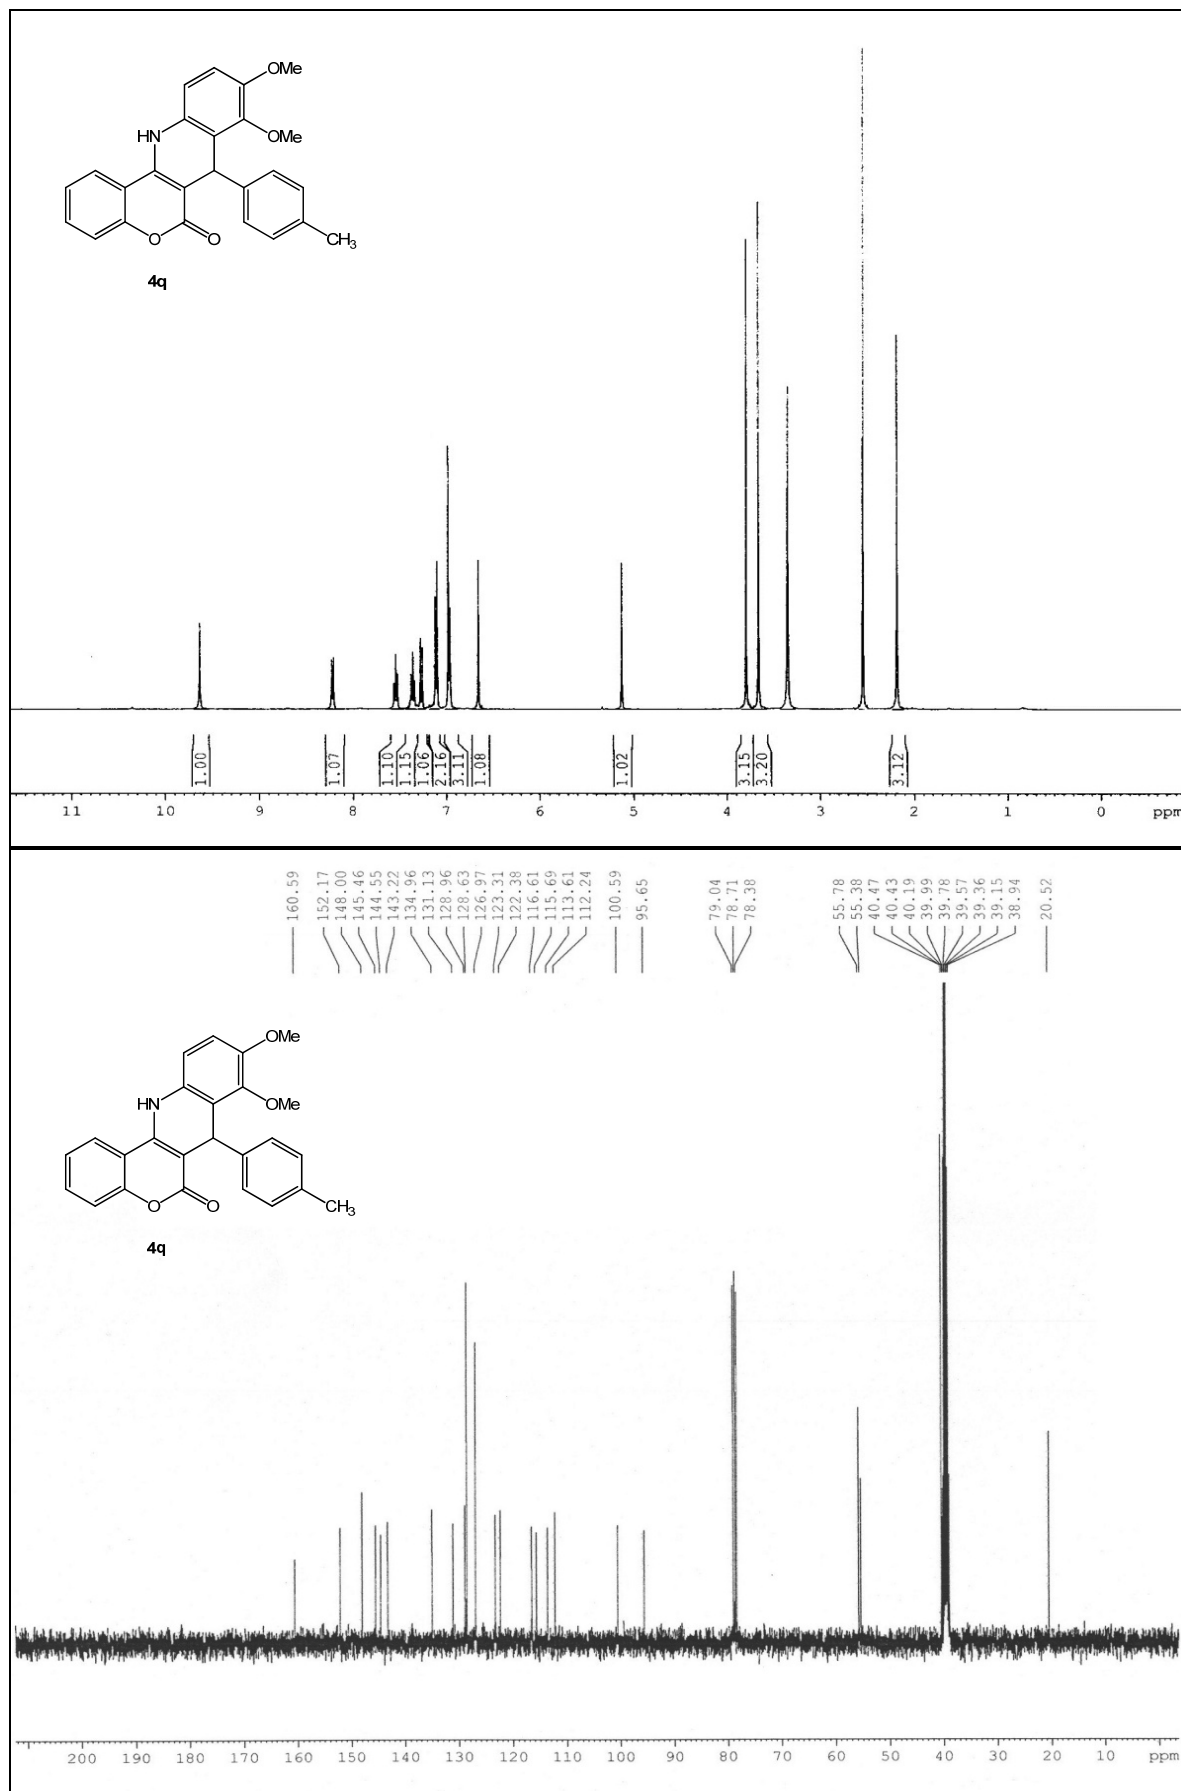

$^1\text{H}$  and  $^{13}\text{C}$  NMR spectra for **4r**

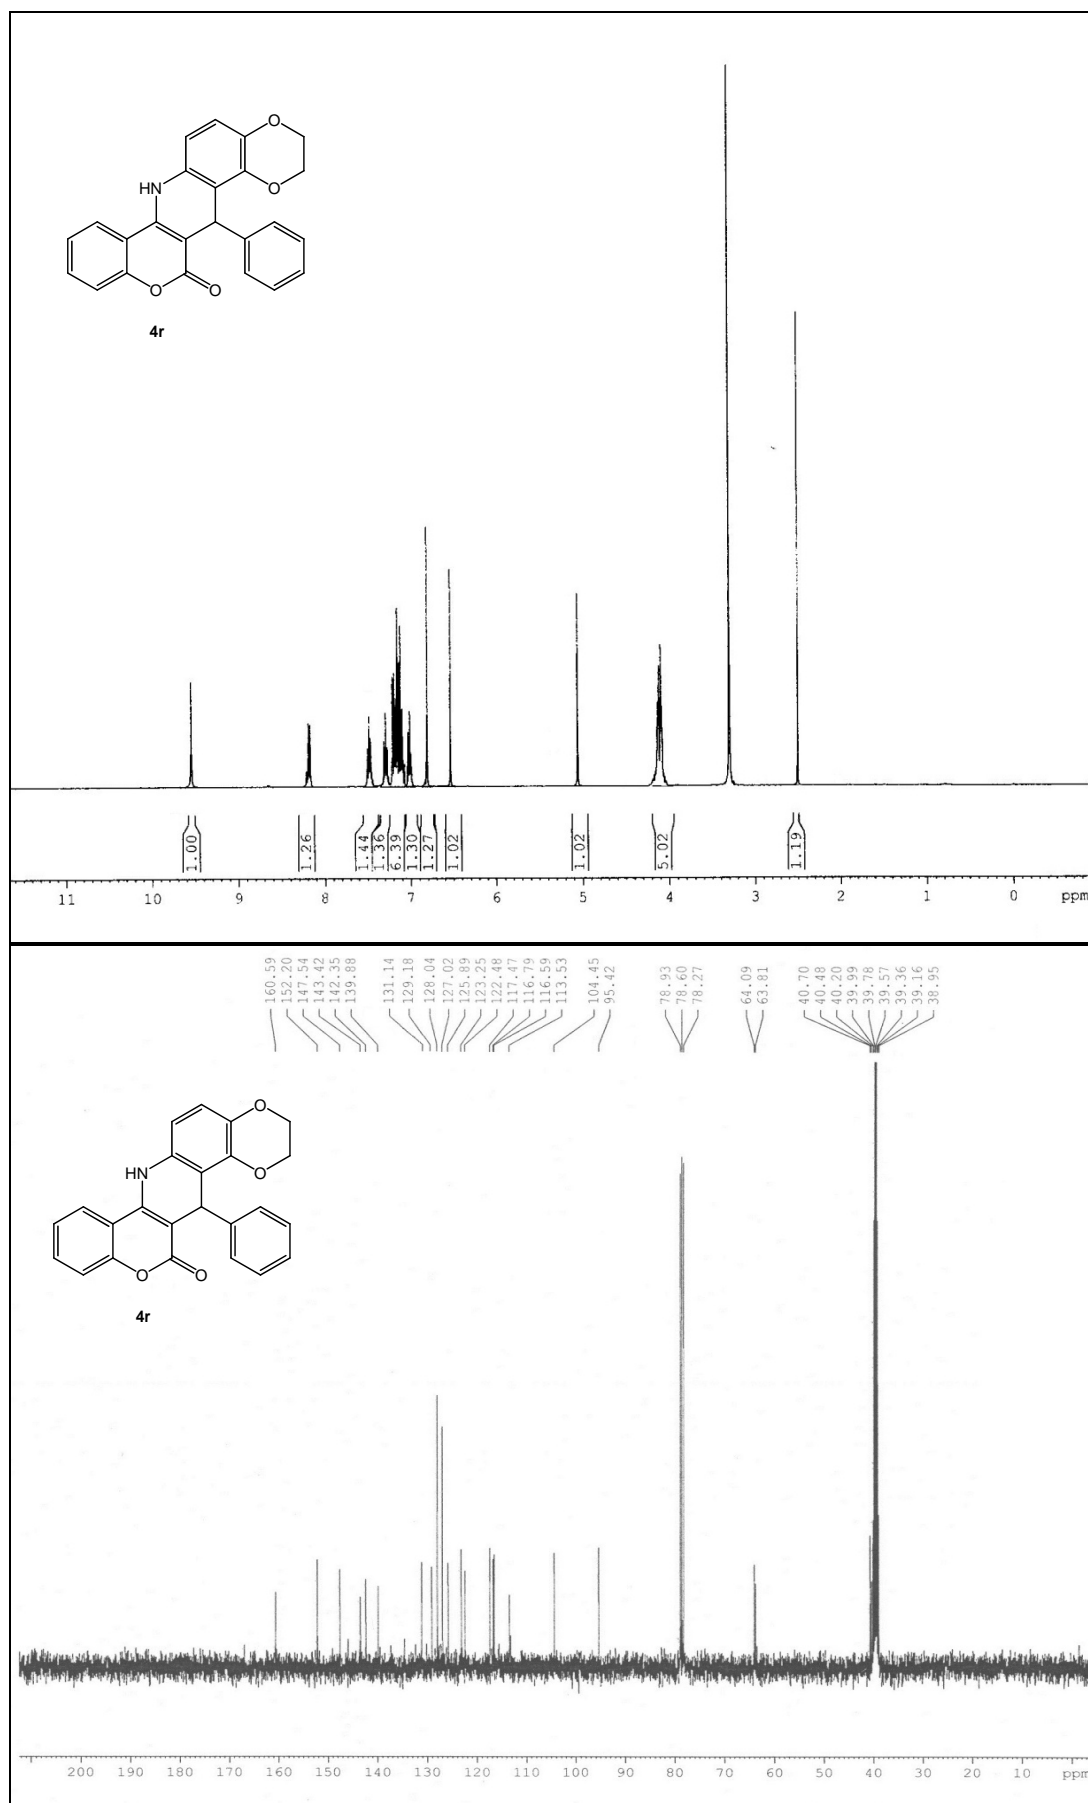



$^1\text{H}$  and  $^{13}\text{C}$  NMR spectra for **4s**

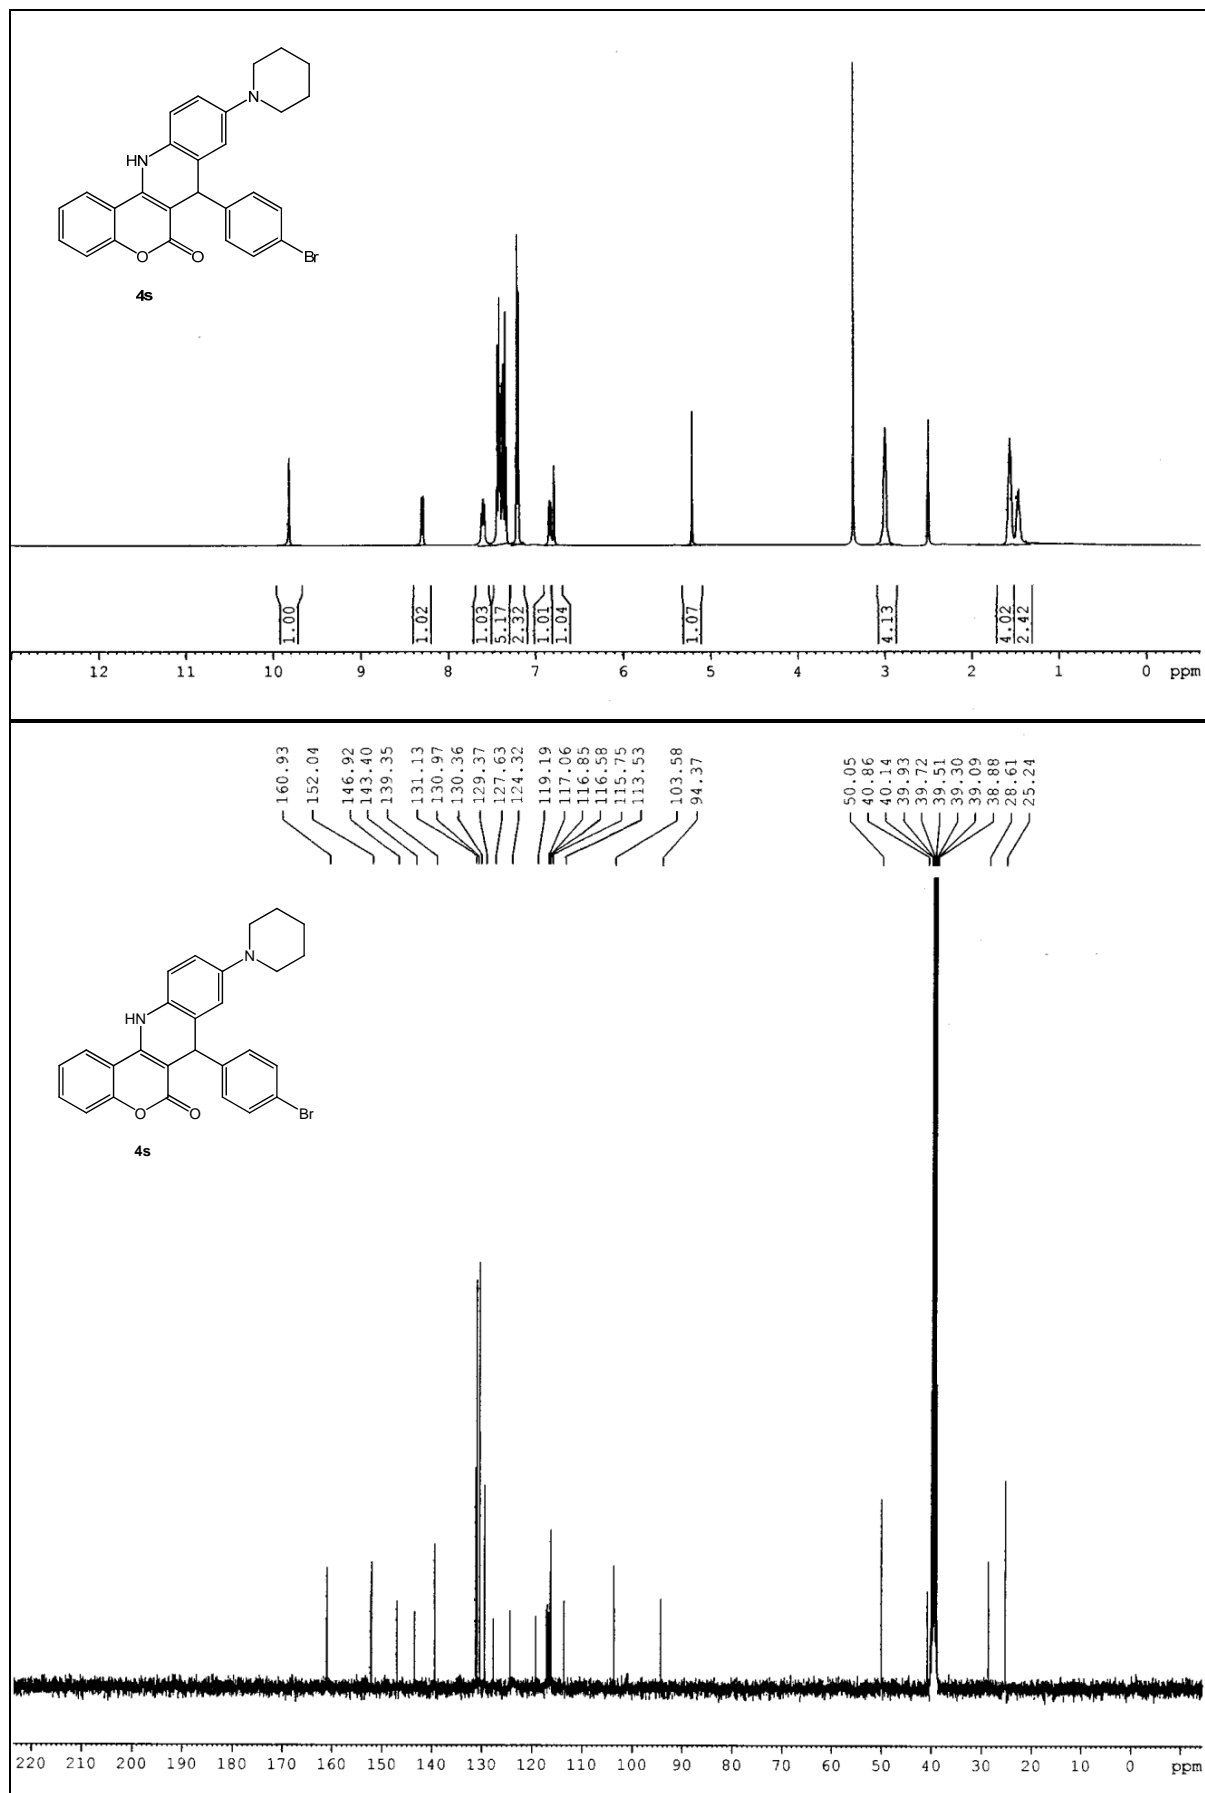

$^1\text{H}$  and  $^{13}\text{C}$  NMR spectra for **5e**

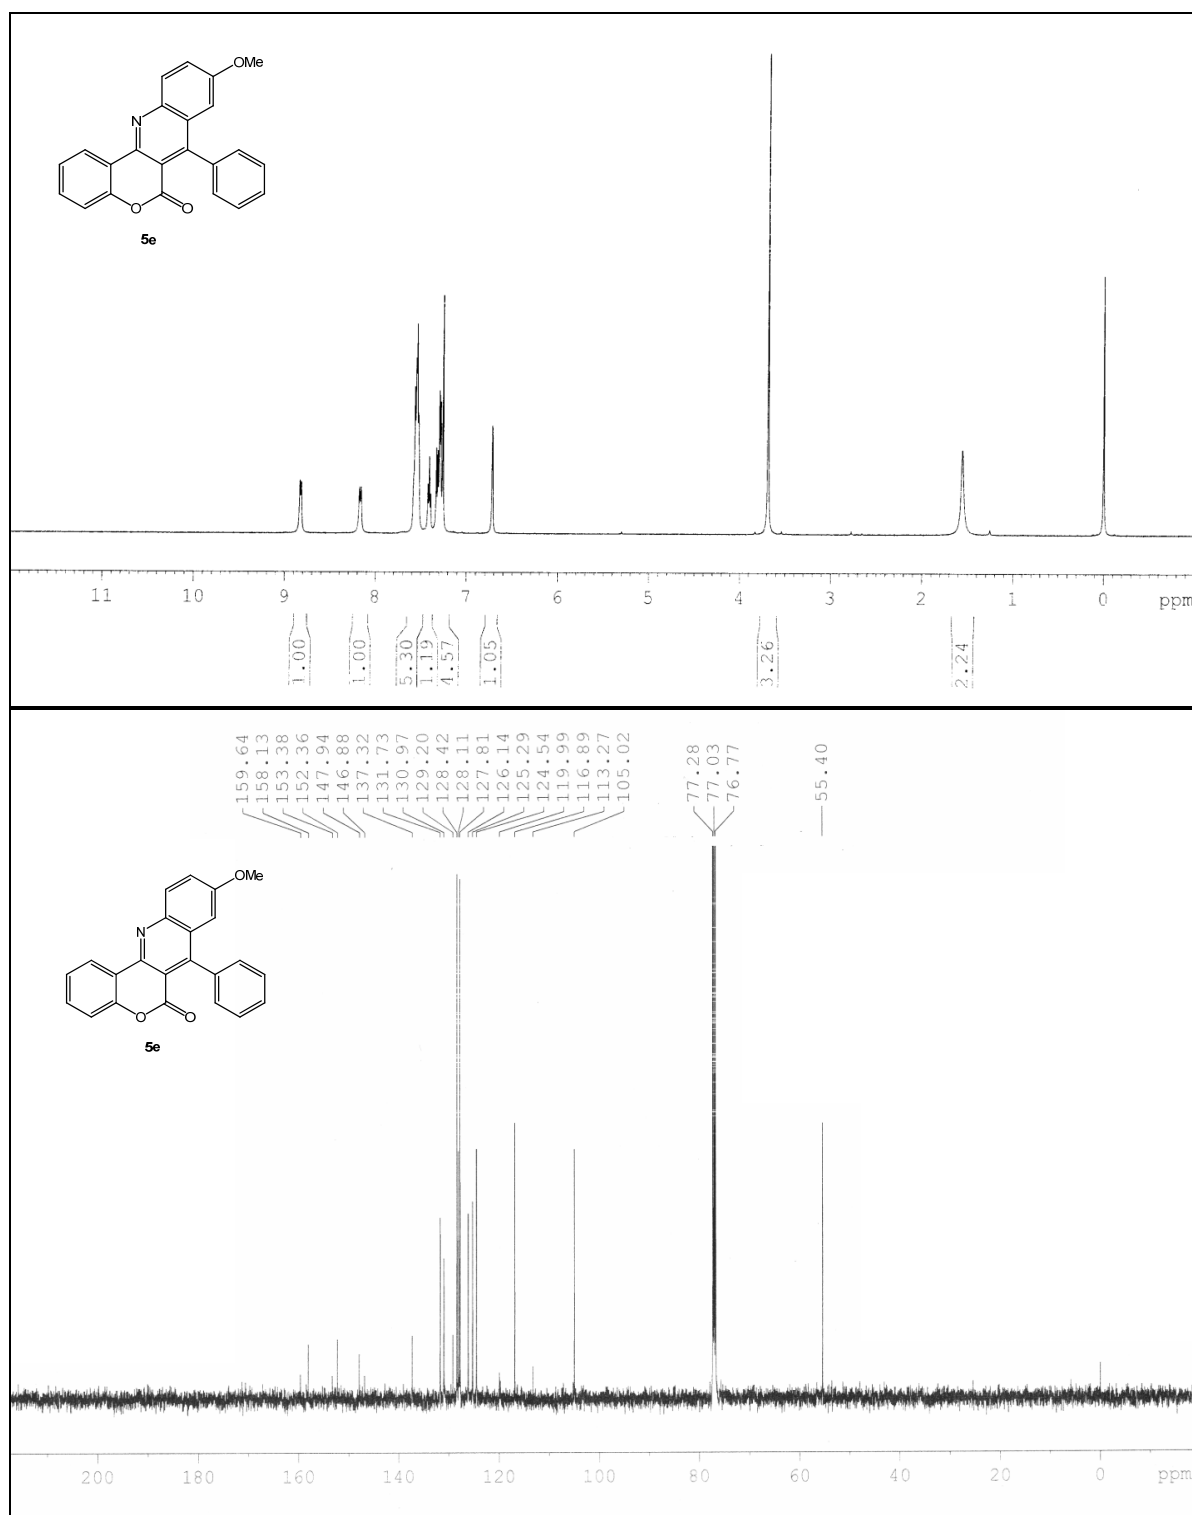

$^1\text{H}$  and  $^{13}\text{C}$  NMR spectra for **5h**

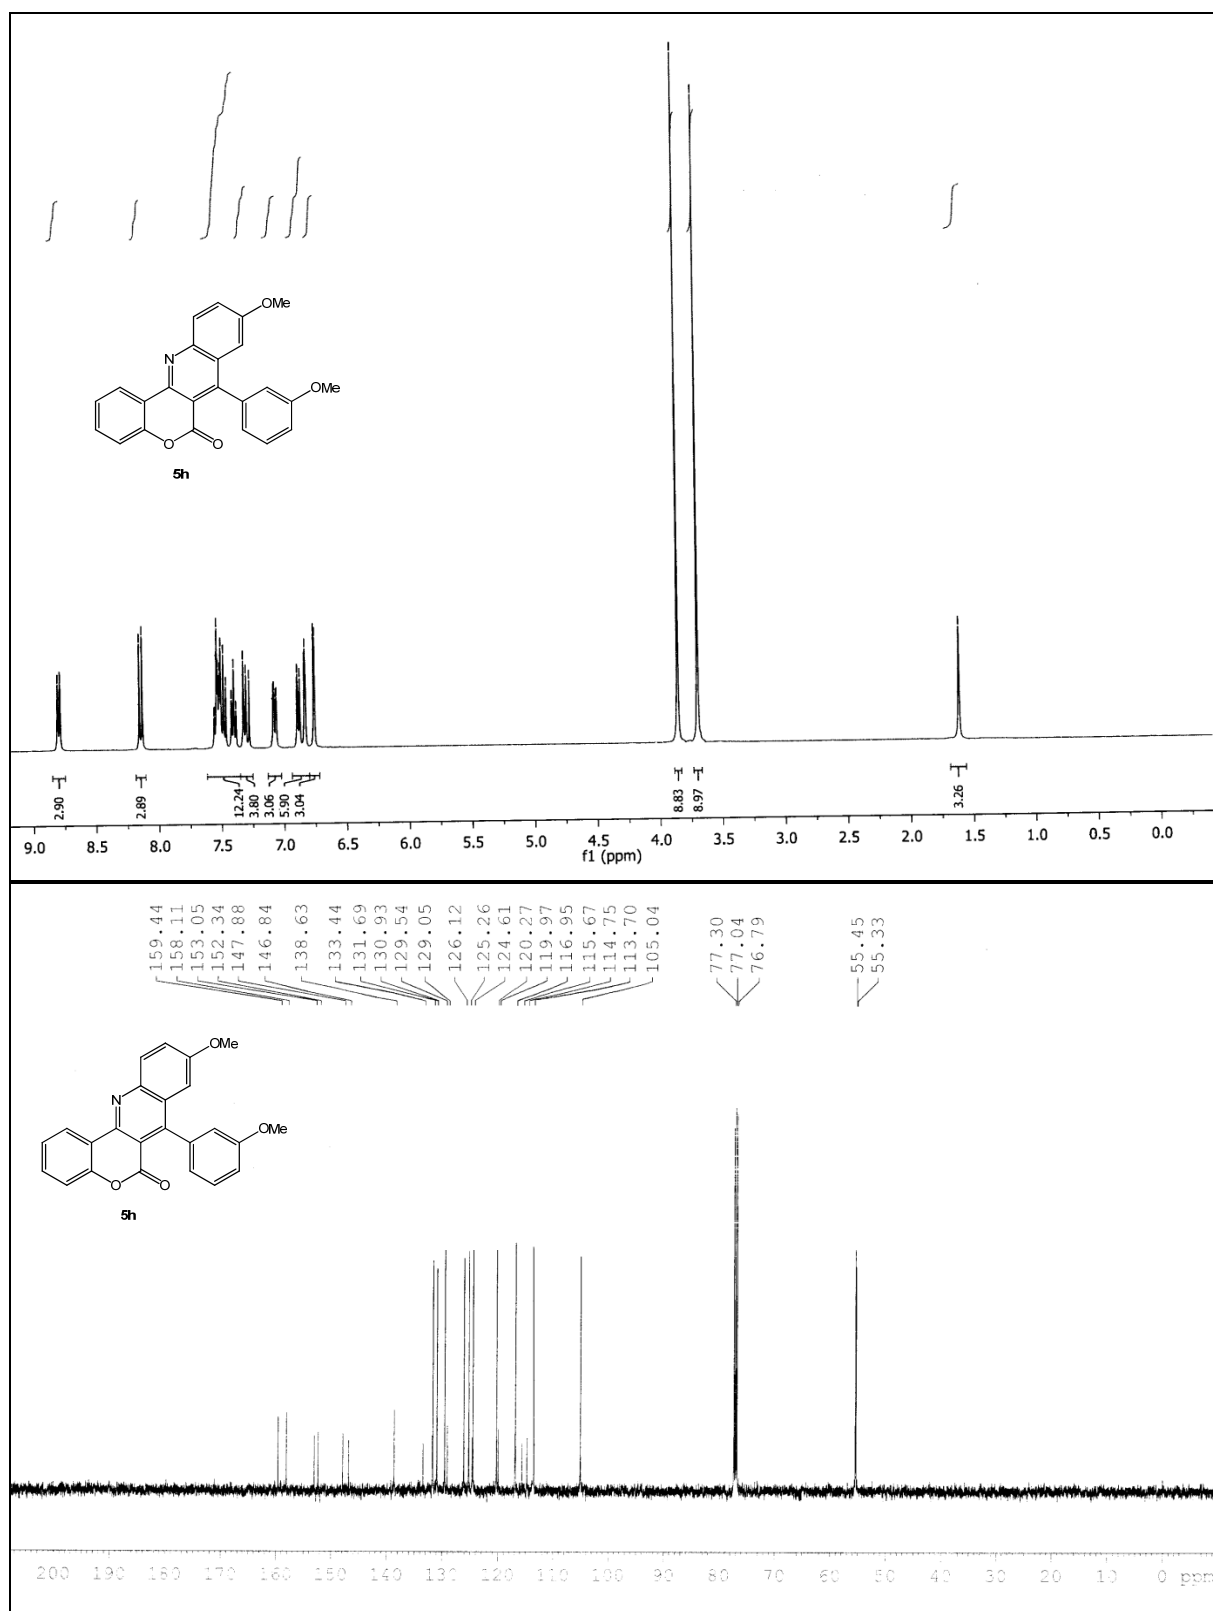

$^1\text{H}$  and  $^{13}\text{C}$  NMR spectra for **5j**

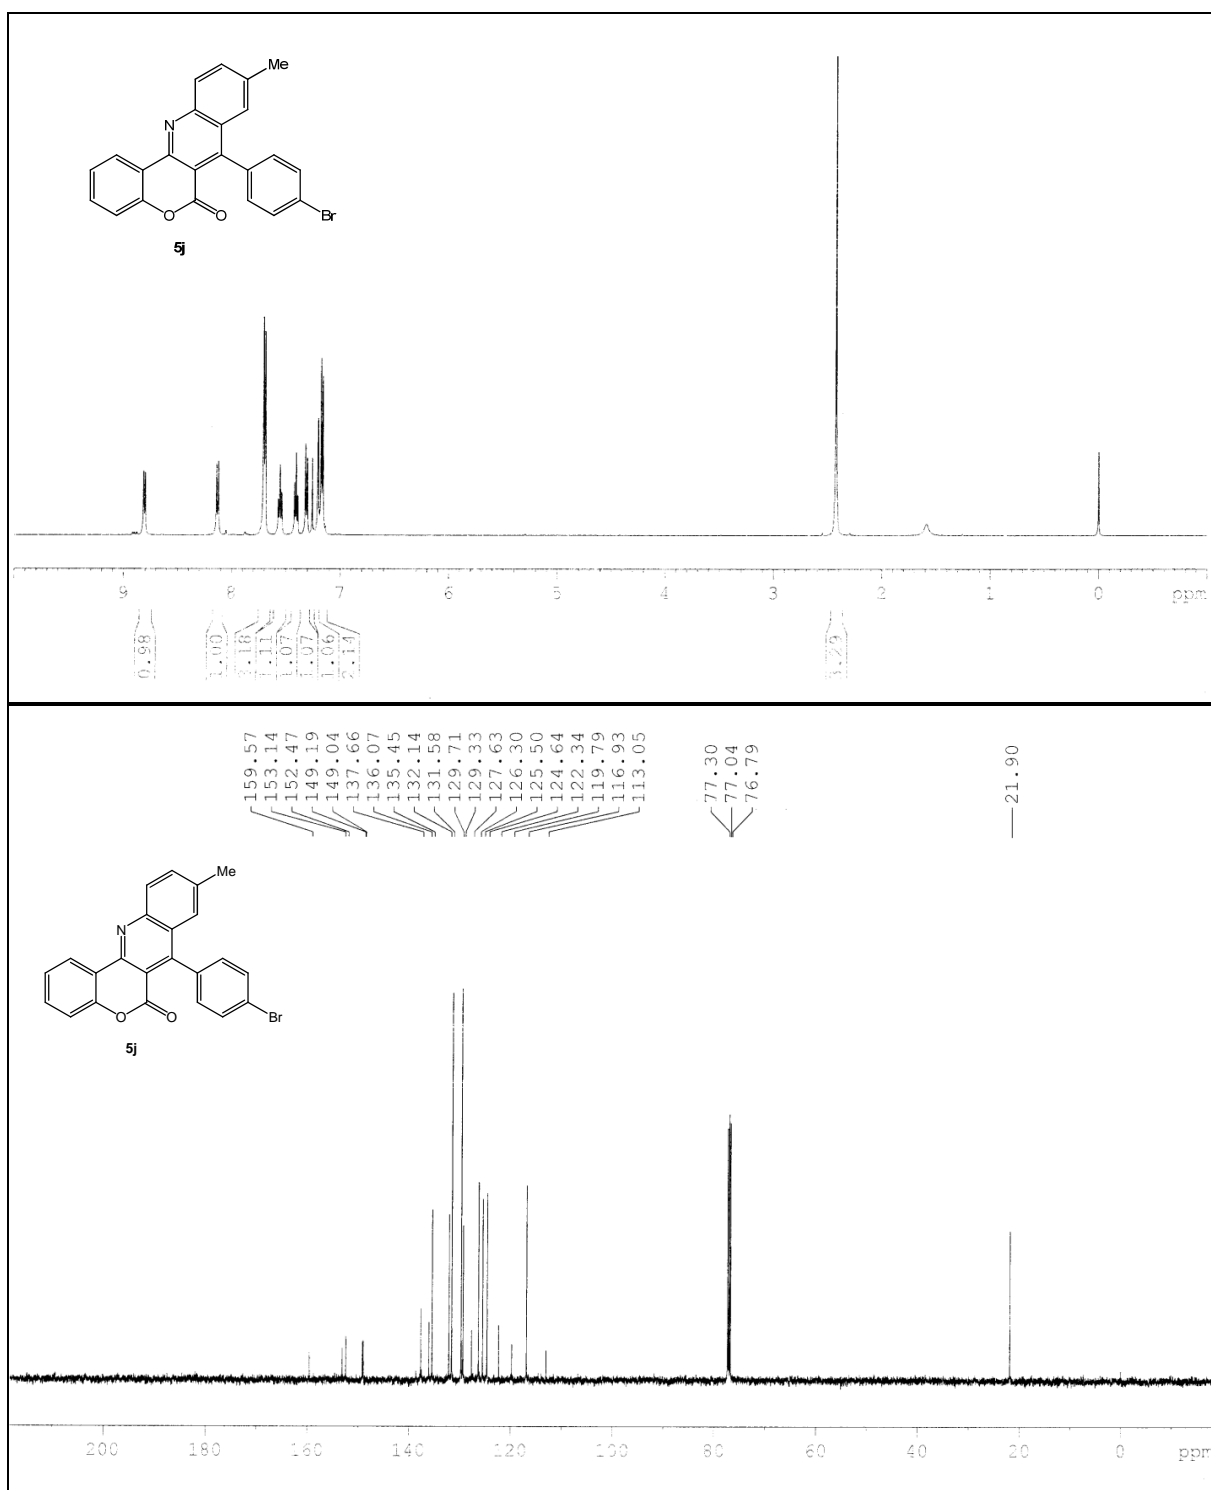

$^1\text{H}$  and  $^{13}\text{C}$  NMR spectra for **51**

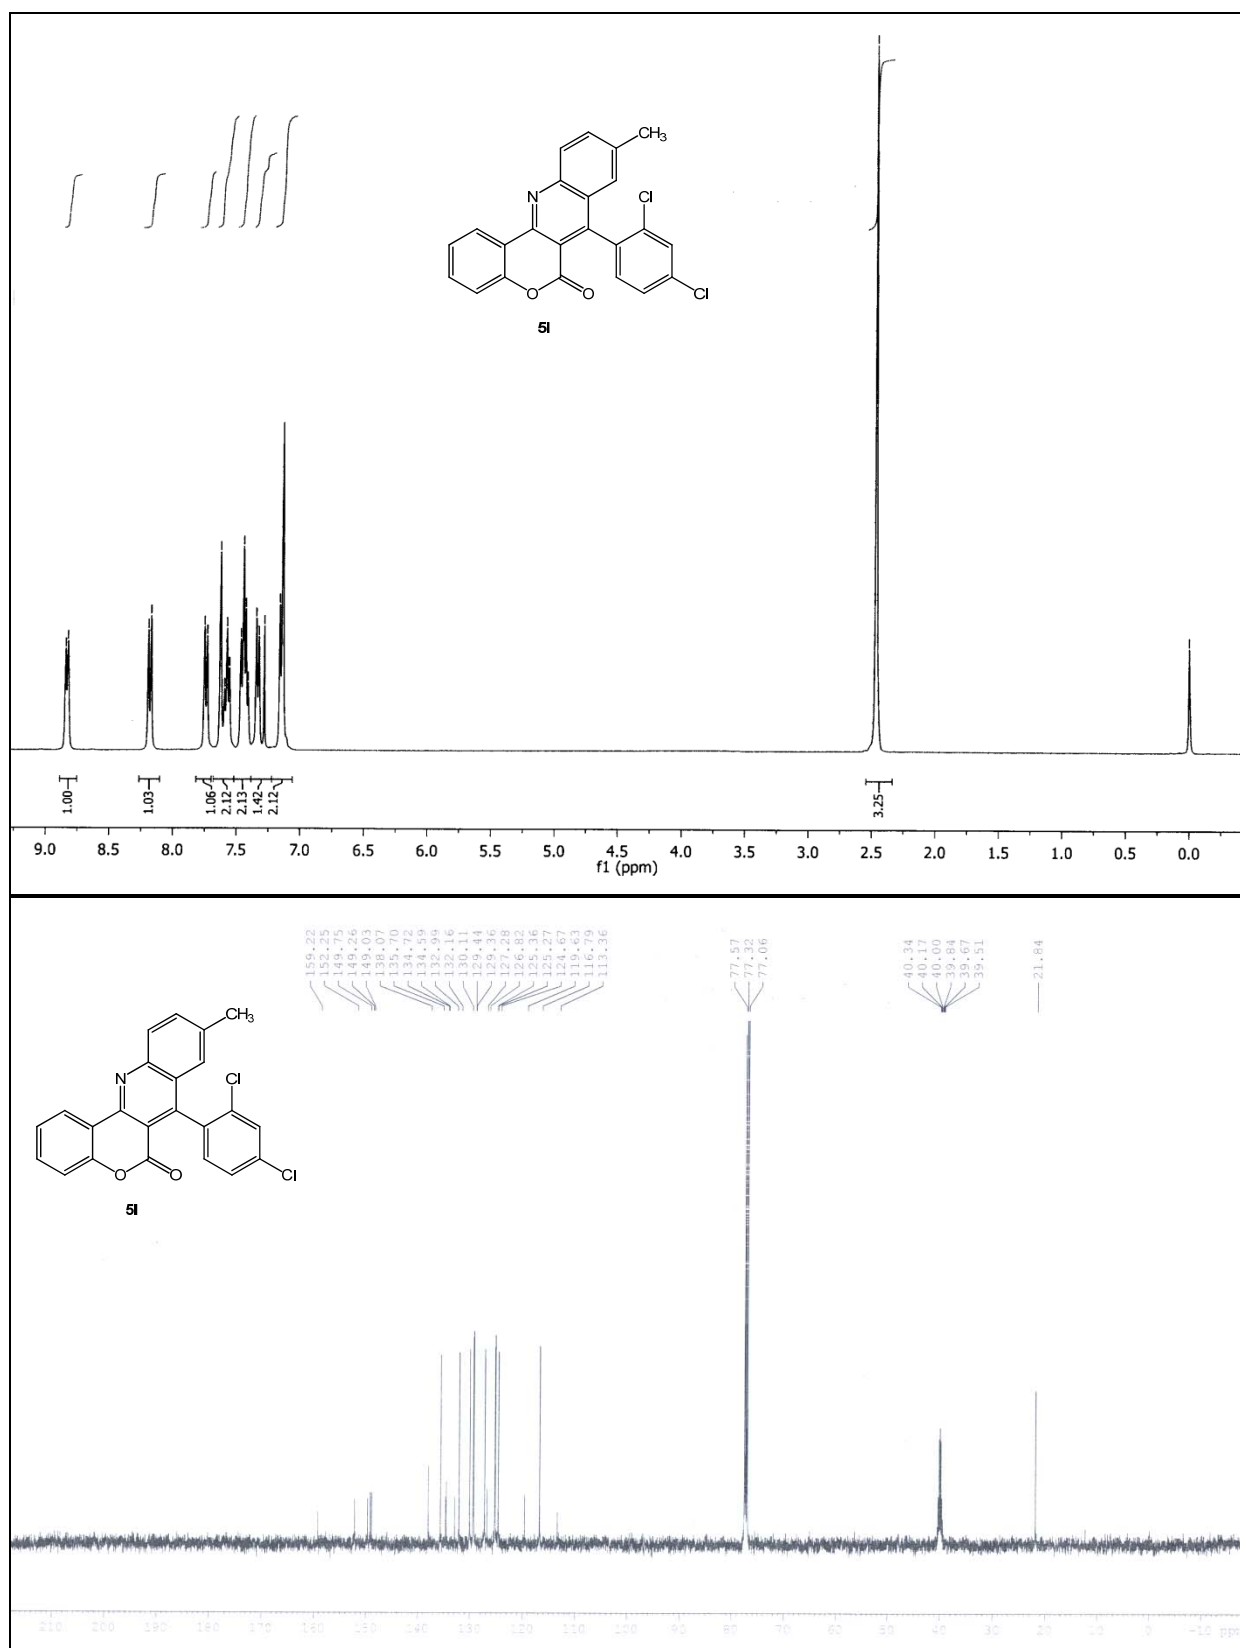

$^1\text{H}$  and  $^{13}\text{C}$  NMR spectra for **5m**

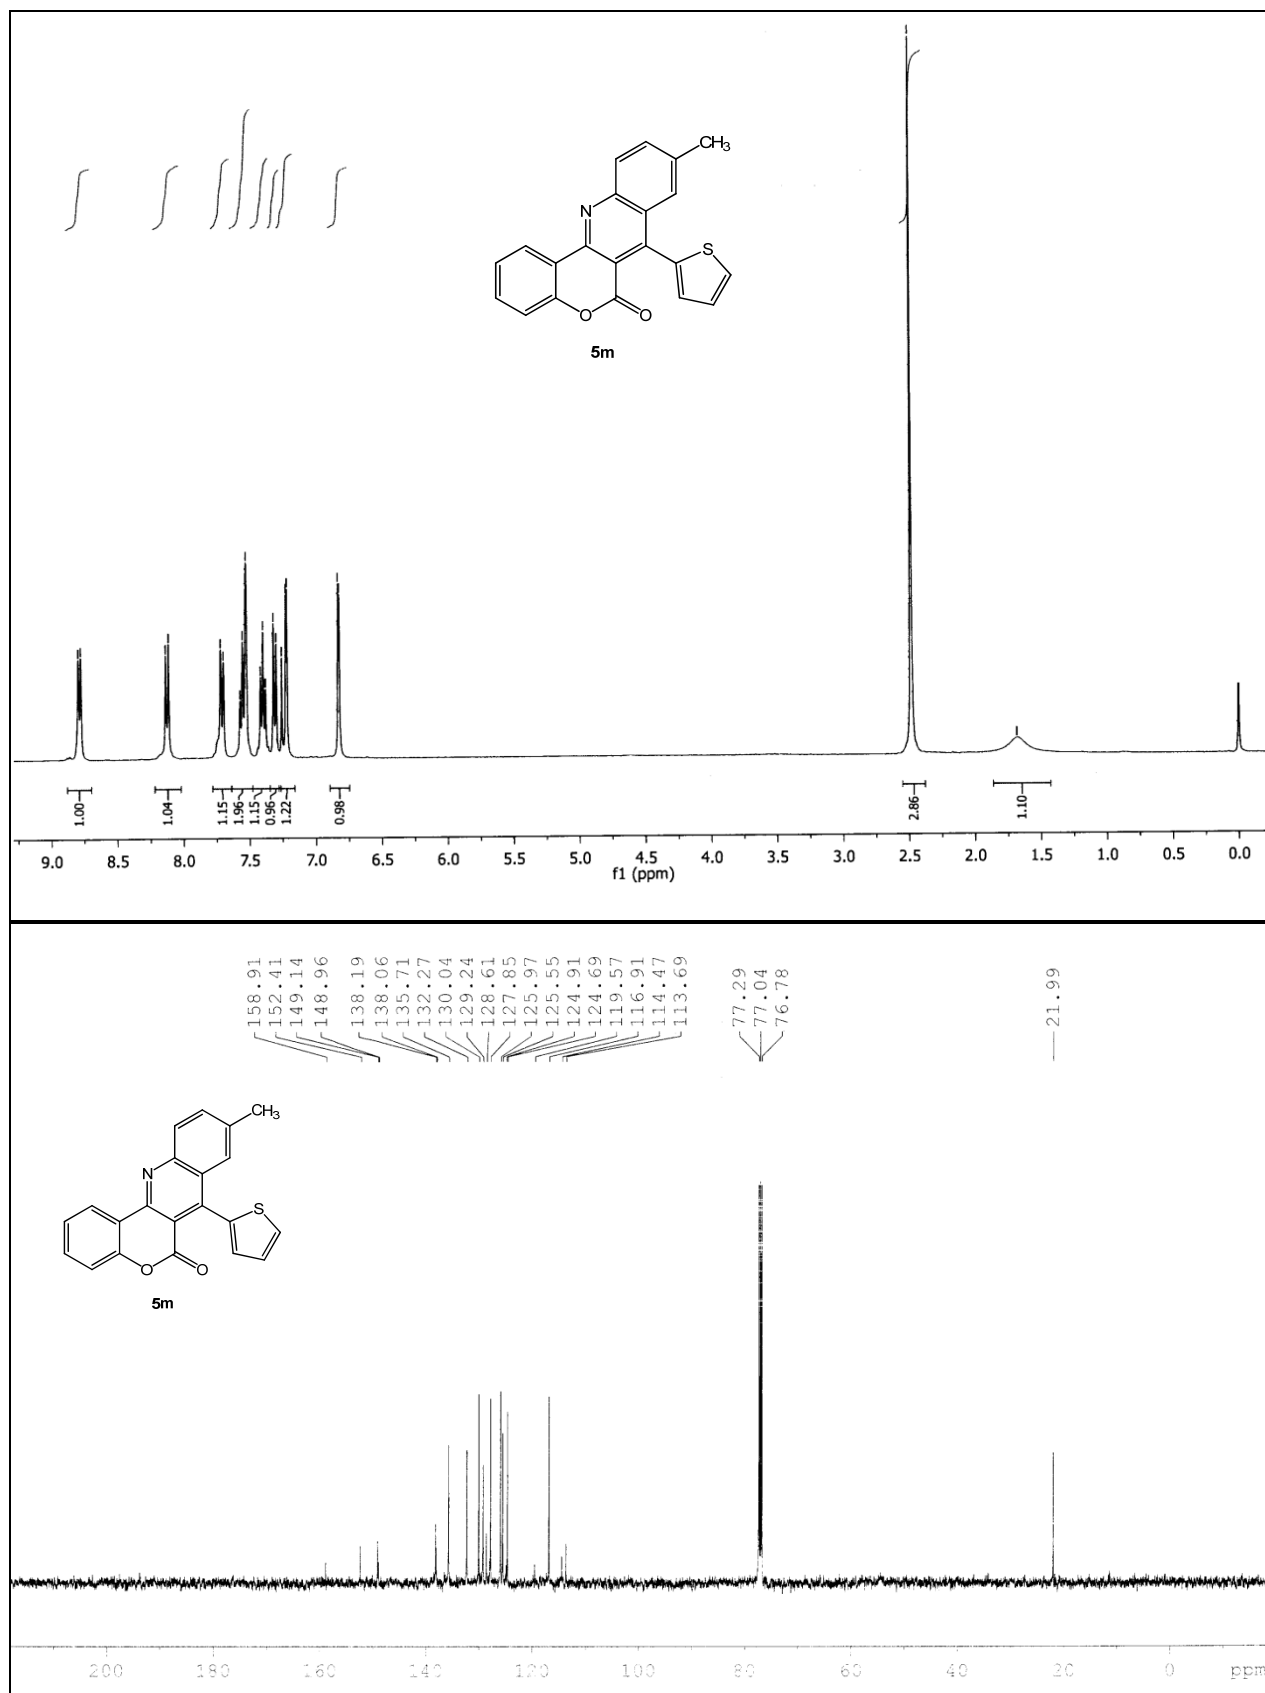

$^1\text{H}$  and  $^{13}\text{C}$  NMR spectra for **5n**

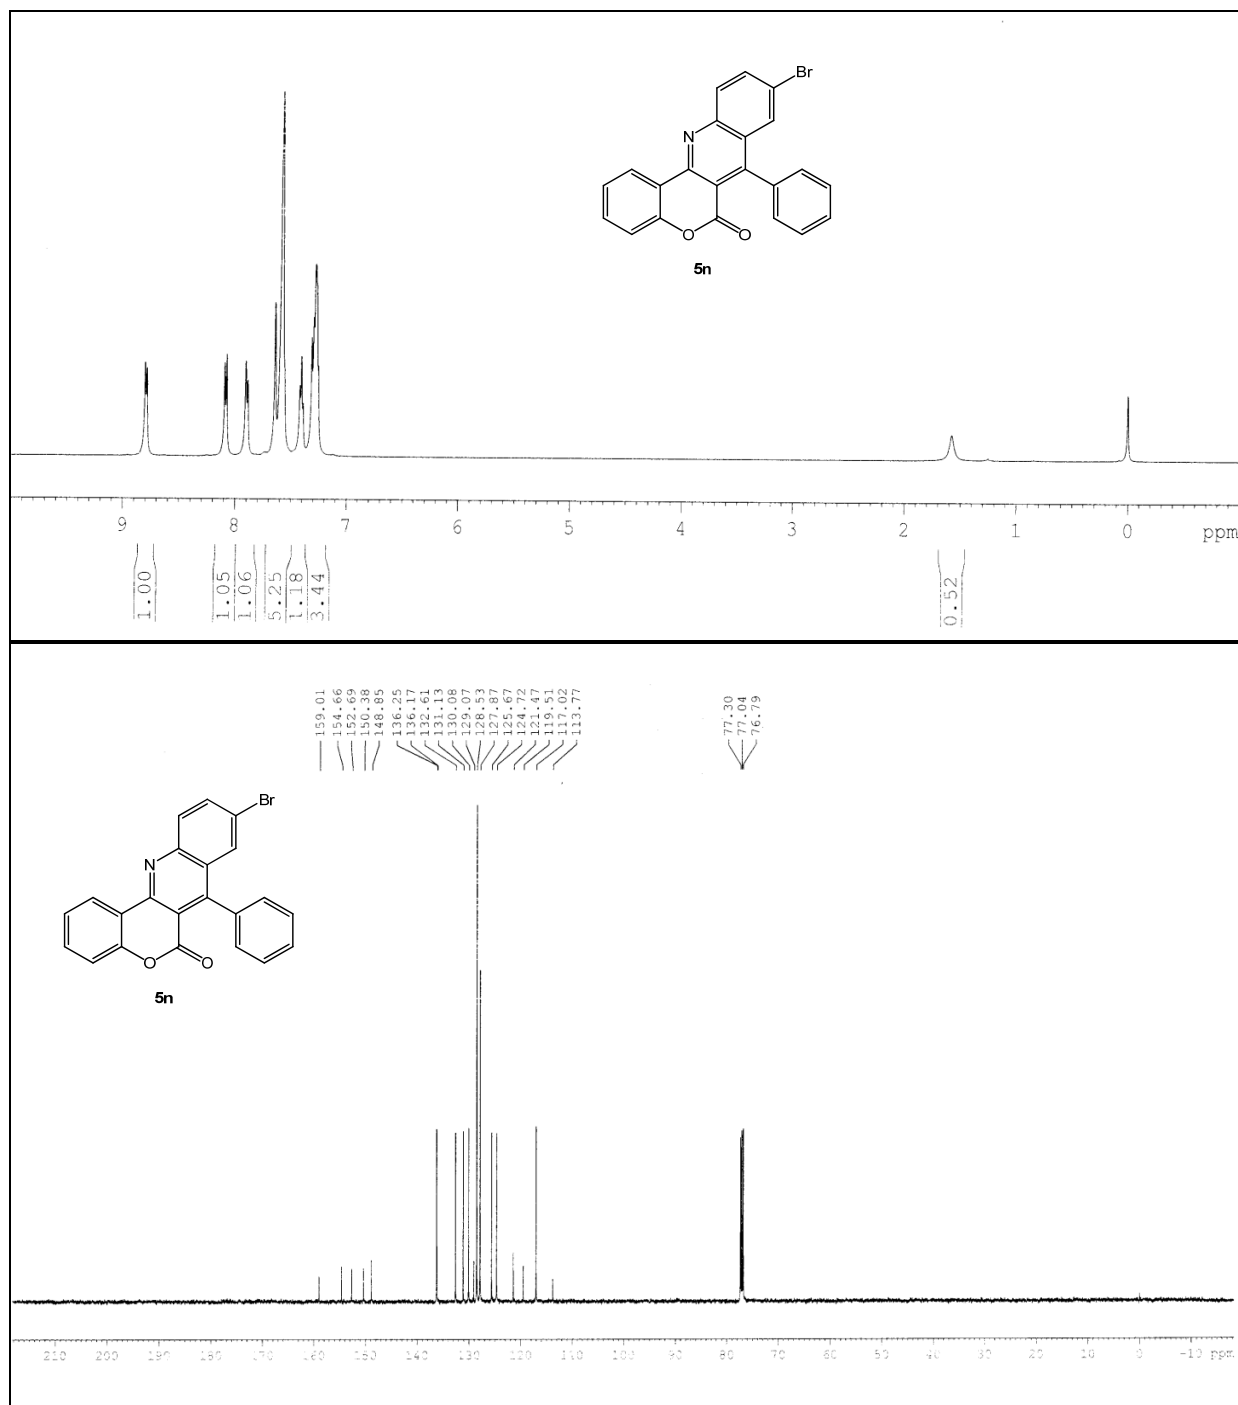

$^1\text{H}$  and  $^{13}\text{C}$  NMR spectra for **5q**

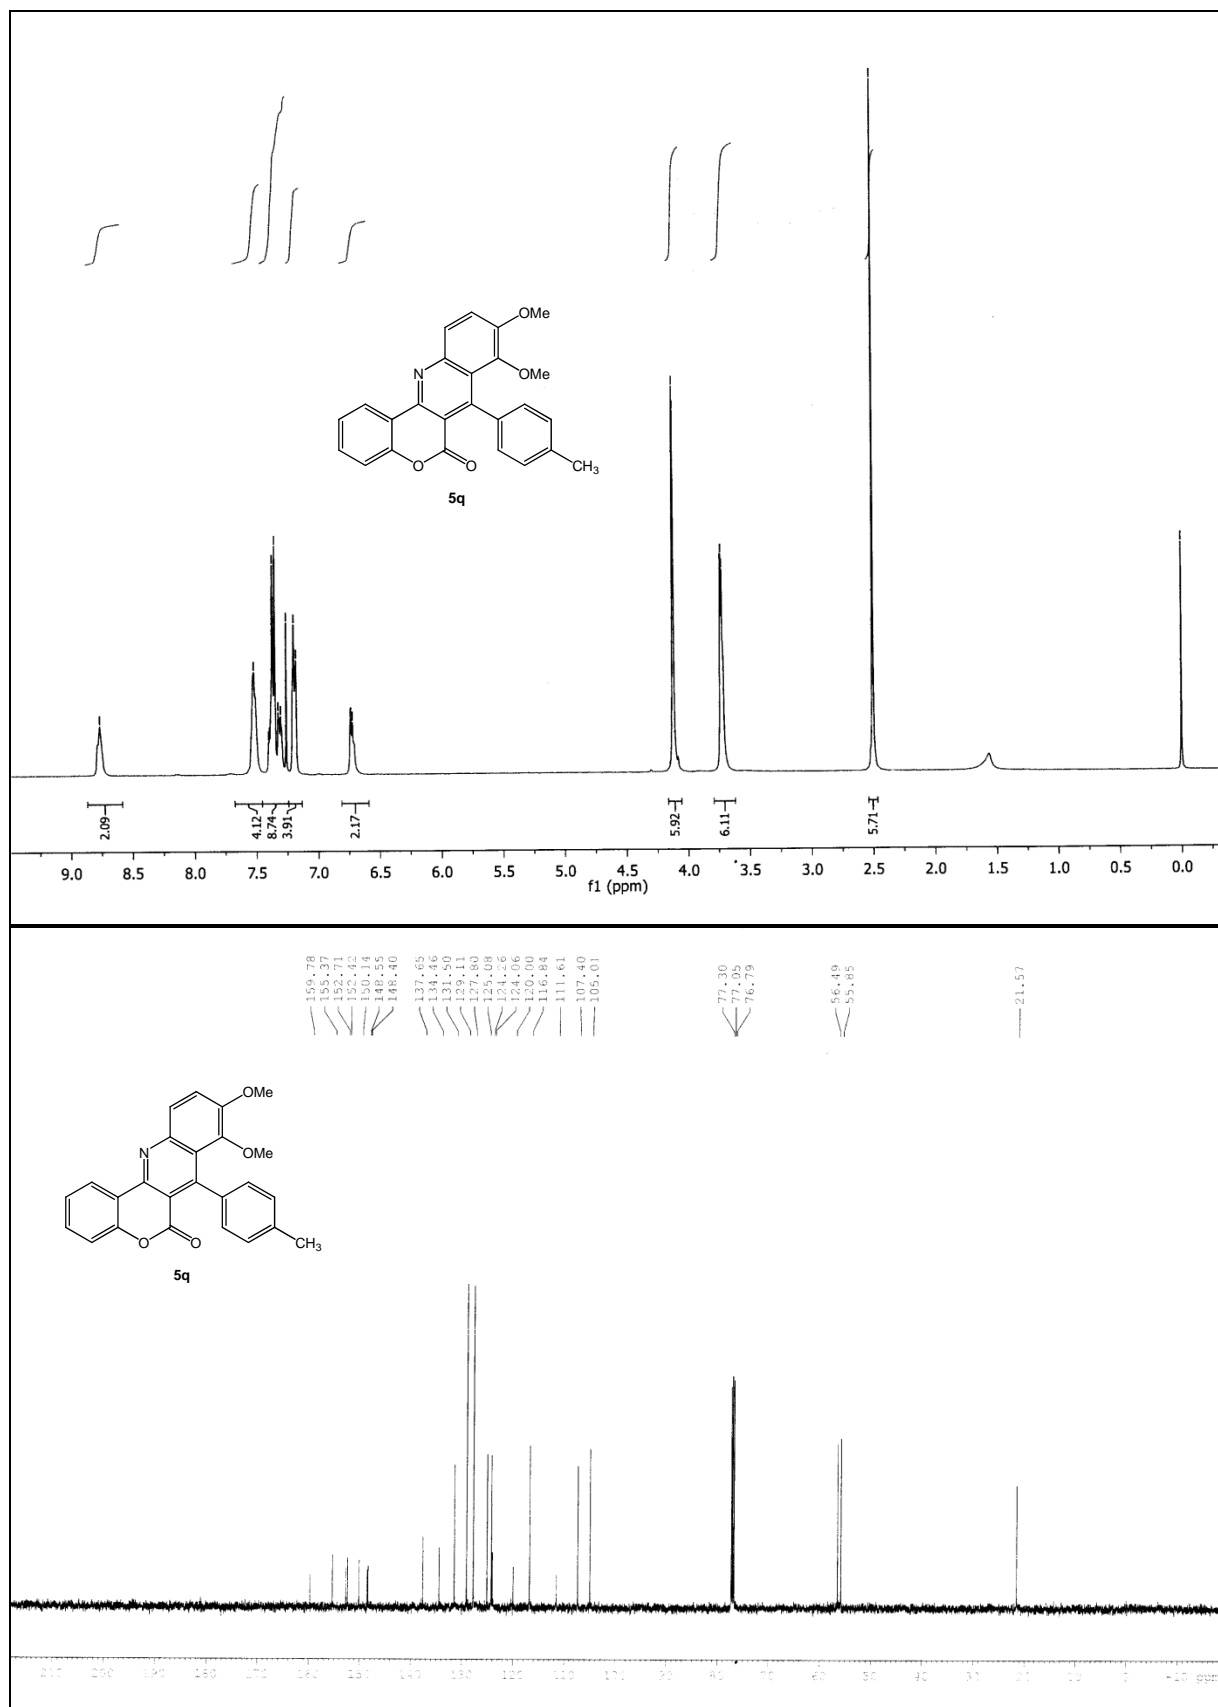



$^1\text{H}$  and  $^{13}\text{C}$  NMR spectra for **6**

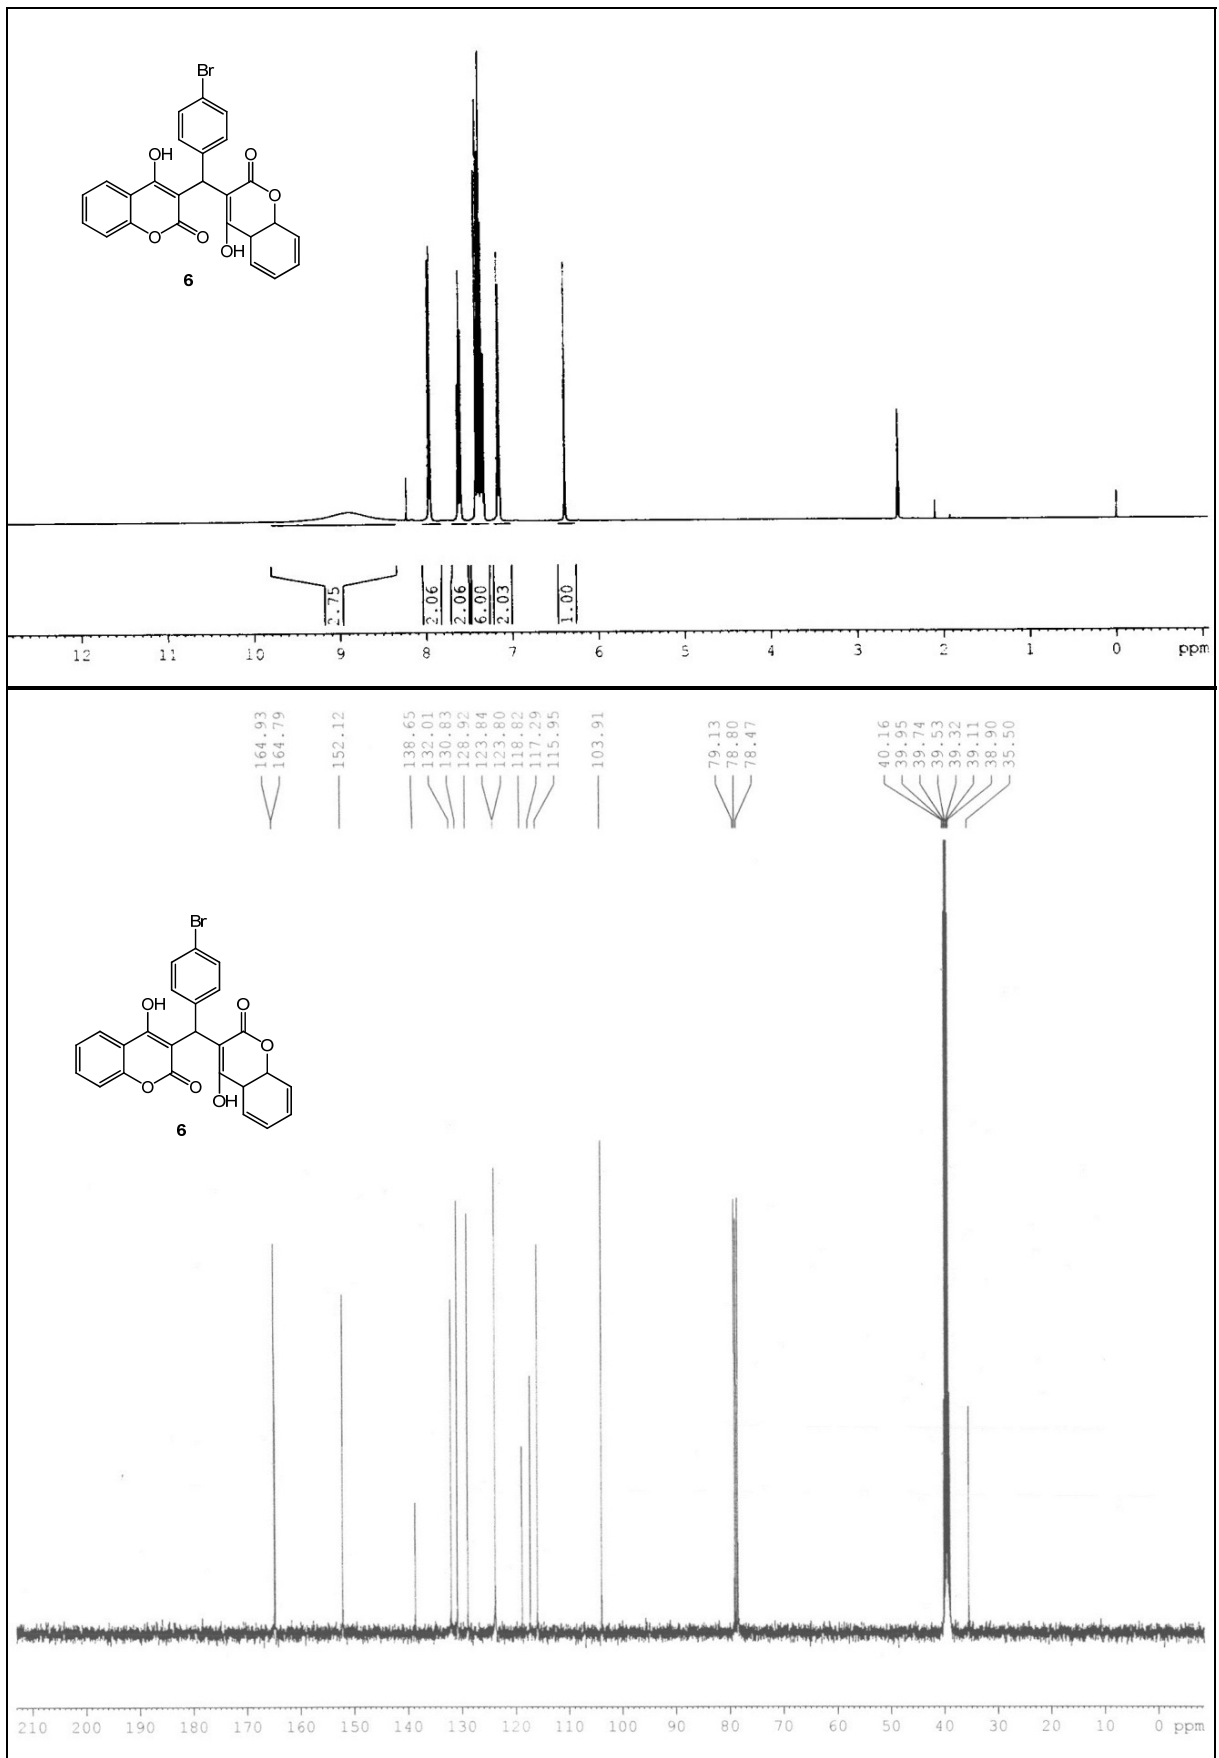

$^1\text{H}$  and  $^{13}\text{C}$  NMR spectra for **7h**

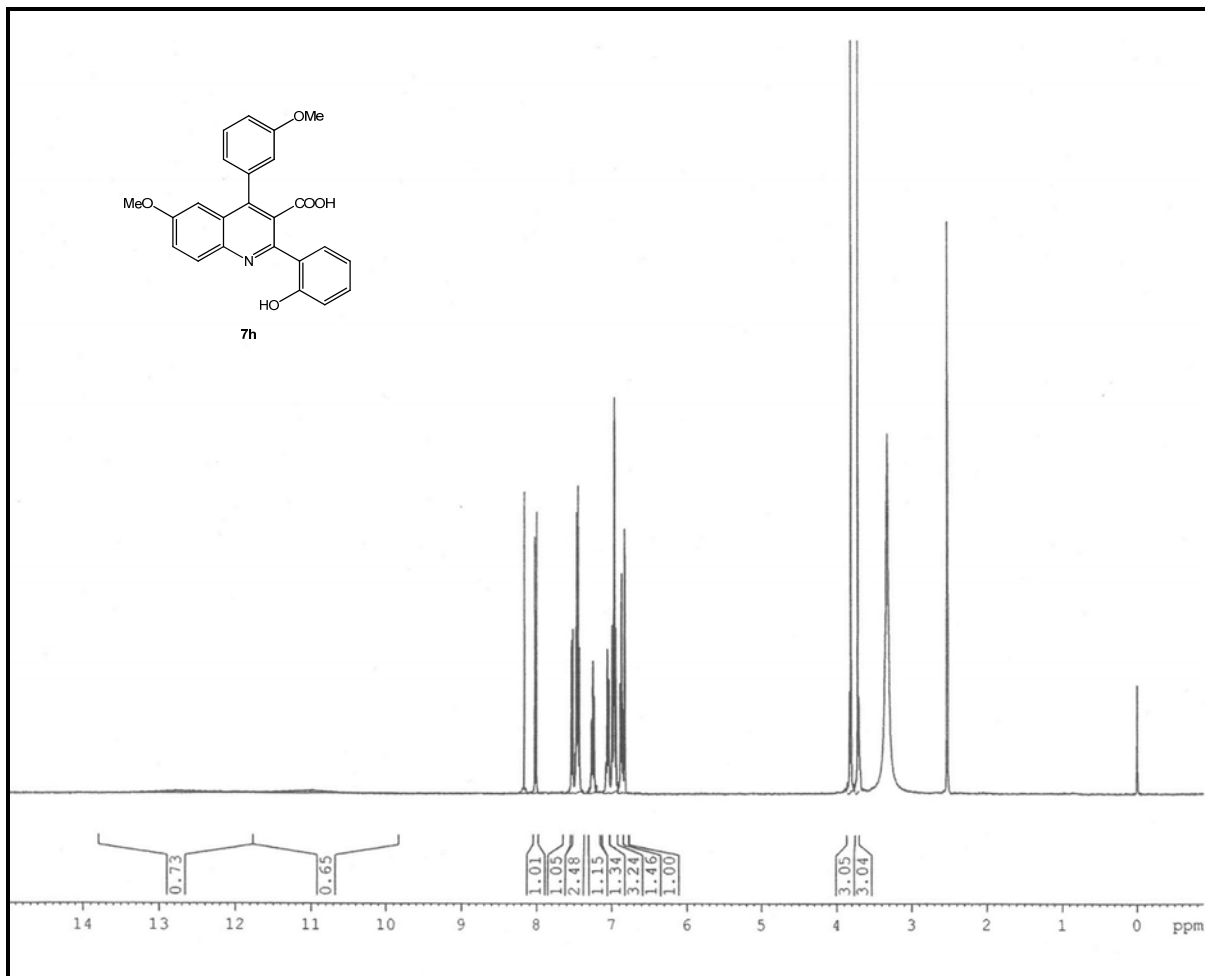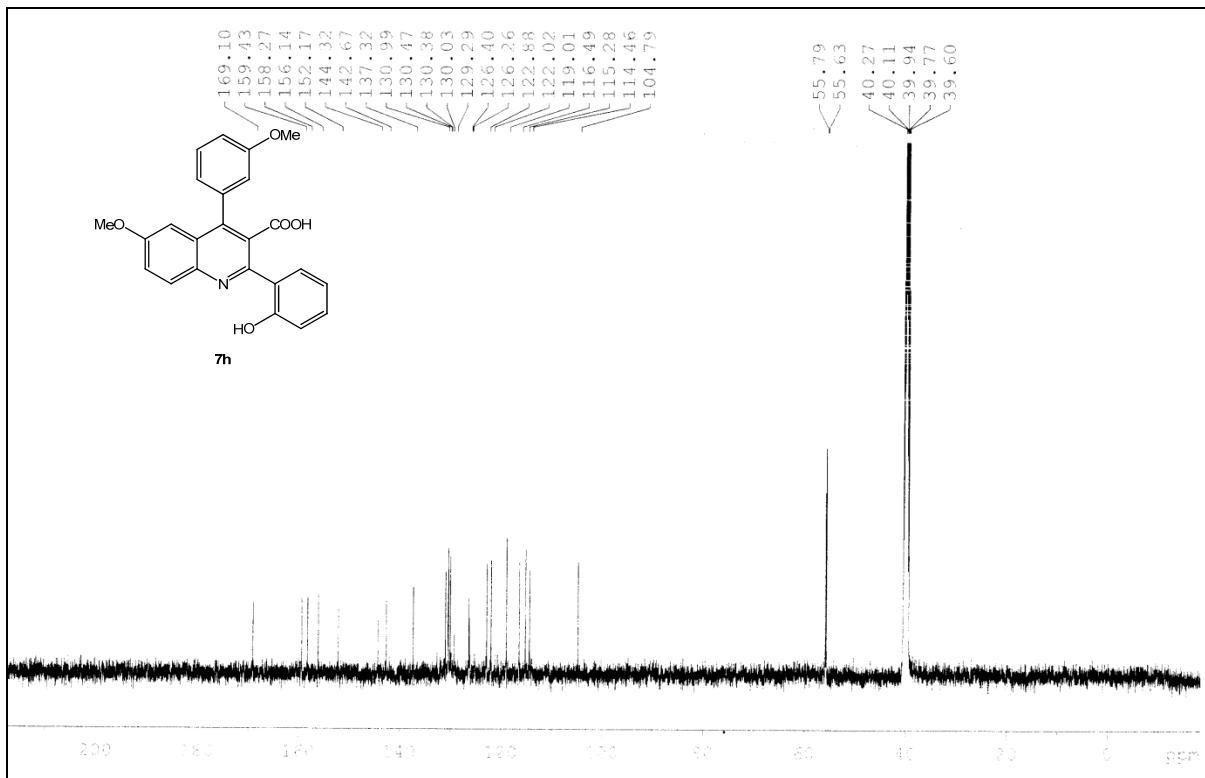

$^1\text{H}$  and  $^{13}\text{C}$  NMR spectra for **7q**

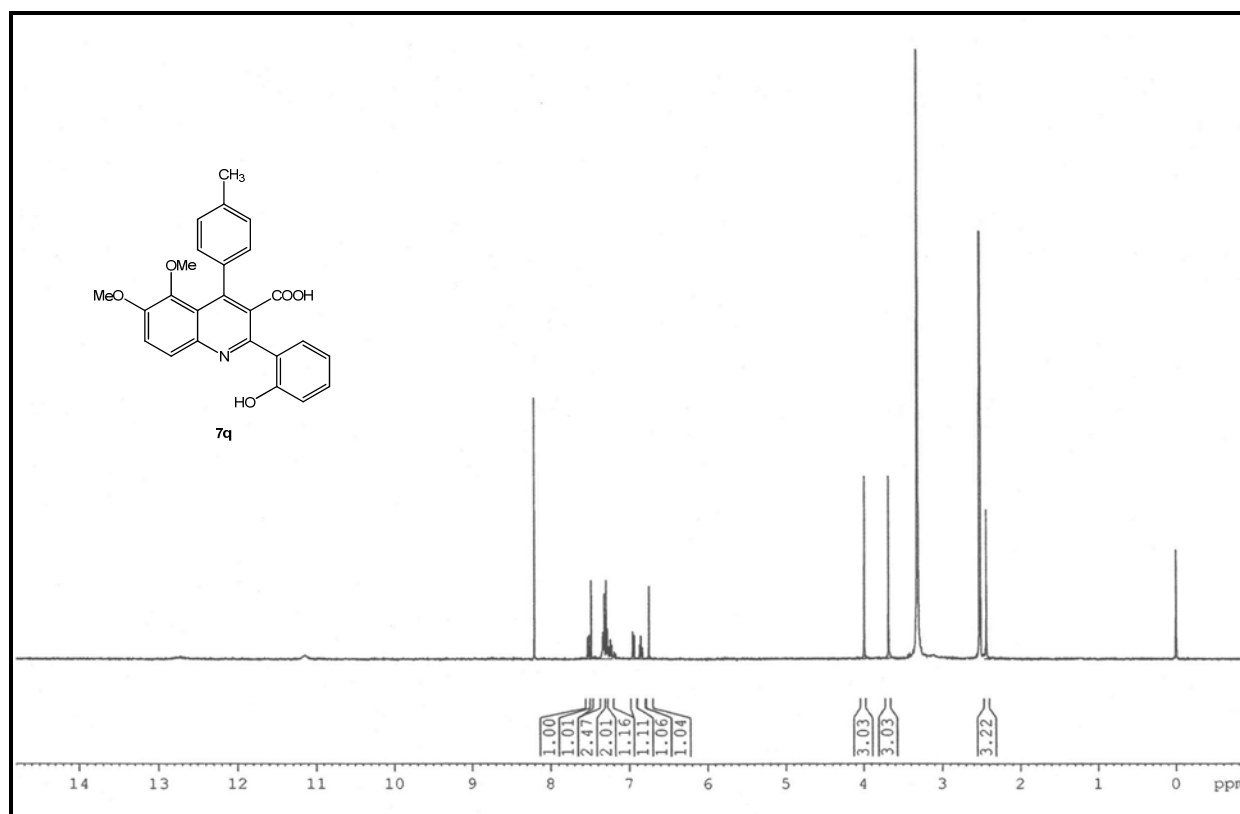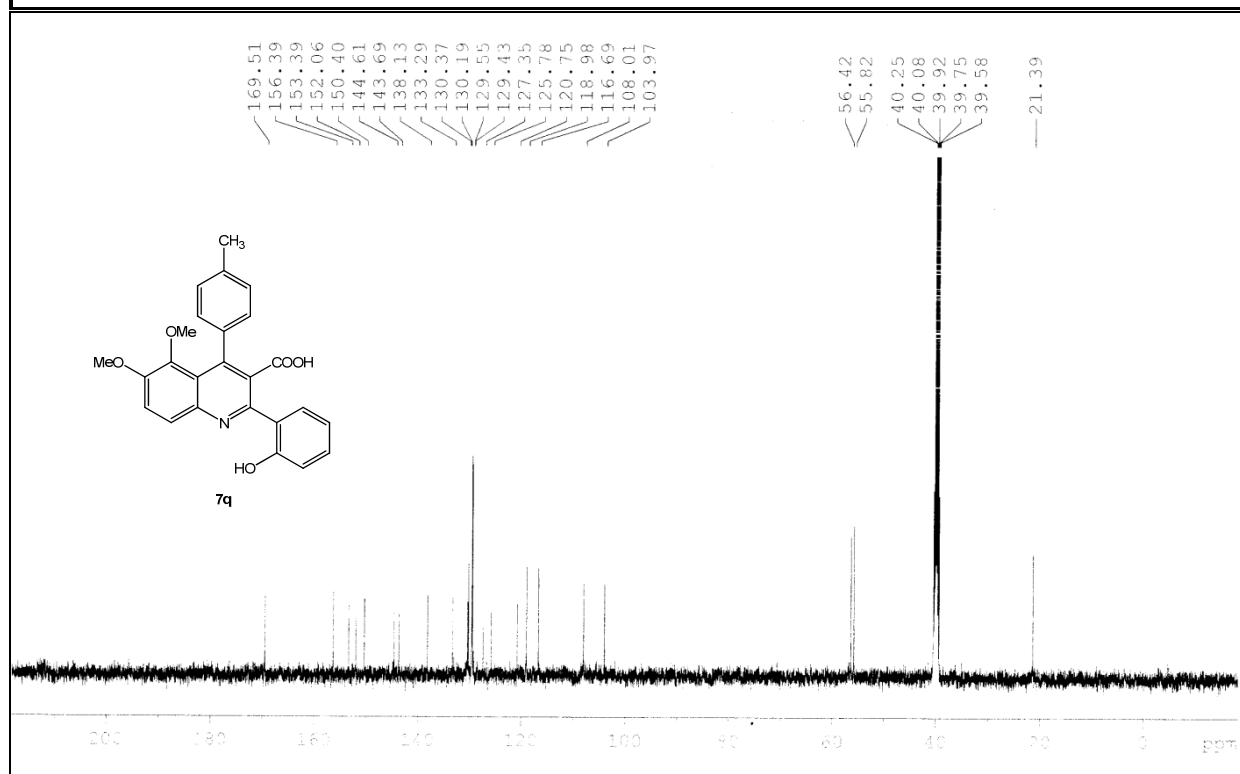

**Fluorescence quantum yield of coumarin fused quinoline (CFDQ)/quinoline (CFQ) derivatives (4a-4s and 5e, 5h, 5j, 5l, 5m, 5n and 5q) in different solvents:**

Quantum yields were calculated with respect to quinine sulphate dihydrate in water<sup>1</sup>.

$\Phi_f$  = Quantum yield

$\lambda_{\max}^{\text{abs}}$  = Absorbance maxima

$\lambda_{\max}^{\text{em}}$  = Fluorescence maxima

Fluorescence quantum yields ( $\Phi_f$ ) were calculated according to the equation.

$$\Phi_{\text{unk}} = \Phi_{\text{std}} \times [I_{\text{unk}} / I_{\text{std}}] \times [A_{\text{std}} / A_{\text{unk}}] \times [\eta_{\text{unk}} / \eta_{\text{std}}]^2$$

Where,  $\Phi_{\text{unk}}$  is the fluorescence quantum yield of the sample,  $\Phi_{\text{std}}$  is the quantum yield of the standard ( $\Phi_f = 0.55$ , quinine sulphate dihydrate in 0.1 N H<sub>2</sub>SO<sub>4</sub>),  $I_{\text{unk}}$  and  $I_{\text{std}}$  are the integrated emission intensities of the sample and the standard, respectively,  $A_{\text{unk}}$  and  $A_{\text{std}}$  are the absorbance of the sample and the standard at the excitation wavelength, respectively, and  $\eta_{\text{unk}}$  and  $\eta_{\text{std}}$  are the refractive index of the medium taken.

References:

1. G. A. Crosby and J. N. Demas, *J. Phys. Chem.*, 1971, **75**, 991.

**TABLE 4: UV-Vis- Fluorescence Data**

| Product | DMSO    |                     |                                   |                             | THF     |                     |                                   |                             | CH <sub>3</sub> CN |                     |                                   |                             | MeOH    |                     |                                   |                             | DCM     |                     |                                   |                             | CHCl <sub>3</sub> |                     |                                   |                             |
|---------|---------|---------------------|-----------------------------------|-----------------------------|---------|---------------------|-----------------------------------|-----------------------------|--------------------|---------------------|-----------------------------------|-----------------------------|---------|---------------------|-----------------------------------|-----------------------------|---------|---------------------|-----------------------------------|-----------------------------|-------------------|---------------------|-----------------------------------|-----------------------------|
|         | Ex (nm) | E <sub>m</sub> (nm) | Δ $\bar{\nu}$ (cm <sup>-1</sup> ) | Ø <sub>f</sub> <sup>a</sup> | Ex (nm) | E <sub>m</sub> (nm) | Δ $\bar{\nu}$ (cm <sup>-1</sup> ) | Ø <sub>f</sub> <sup>a</sup> | Ex (nm)            | E <sub>m</sub> (nm) | Δ $\bar{\nu}$ (cm <sup>-1</sup> ) | Ø <sub>f</sub> <sup>a</sup> | Ex (nm) | E <sub>m</sub> (nm) | Δ $\bar{\nu}$ (cm <sup>-1</sup> ) | Ø <sub>f</sub> <sup>a</sup> | Ex (nm) | E <sub>m</sub> (nm) | Δ $\bar{\nu}$ (cm <sup>-1</sup> ) | Ø <sub>f</sub> <sup>a</sup> | Ex (nm)           | E <sub>m</sub> (nm) | Δ $\bar{\nu}$ (cm <sup>-1</sup> ) | Ø <sub>f</sub> <sup>a</sup> |
| 4a      | 342     | 430                 | 5984                              | 0.34                        | 349     | 416                 | 4615                              | 0.28                        | 332                | 422                 | 6424                              | 0.20                        | 346     | 431                 | 5700                              | 0.37                        | 343     | 412                 | 4883                              | 0.18                        | 337               | 413                 | 5460                              | 0.29                        |
| 4b      | 346     | 428                 | 5537                              | 0.53                        | 354     | 417                 | 4268                              | 0.42                        | 337                | 418                 | 5750                              | 0.49                        | 345     | 427                 | 5566                              | 0.56                        | 334     | 422                 | 6243                              | 0.34                        | 340               | 415                 | 5315                              | 0.38                        |
| 4c      | 353     | 426                 | 4854                              | 0.58                        | 351     | 424                 | 4905                              | 0.42                        | 356                | 423                 | 4449                              | 0.31                        | 342     | 432                 | 6091                              | 0.36                        | 351     | 442                 | 5865                              | 0.33                        | 350               | 432                 | 5423                              | 0.27                        |
| 4d      | 352     | 431                 | 5207                              | 0.57                        | 348     | 428                 | 5371                              | 0.59                        | 351                | 437                 | 5607                              | 0.58                        | 349     | 432                 | 5505                              | 0.57                        | 338     | 421                 | 5824                              | 0.48                        | 347               | 429                 | 5508                              | 0.41                        |
| 4e      | 359     | 460                 | 6116                              | 0.47                        | 351     | 445                 | 6018                              | 0.40                        | 354                | 460                 | 6509                              | 0.37                        | 359     | 466                 | 6396                              | 0.36                        | 355     | 447                 | 5798                              | 0.40                        | 353               | 441                 | 5653                              | 0.41                        |
| 4f      | 356     | 449                 | 5818                              | 0.00                        | 358     | 446                 | 5511                              | 0.16                        | 355                | 469                 | 6847                              | 0.24                        | 365     | 462                 | 5752                              | 0.39                        | 358     | 444                 | 5410                              | 0.31                        | 354               | 445                 | 5776                              | 0.37                        |
| 4g      | 358     | 466                 | 6474                              | 0.45                        | 352     | 448                 | 6088                              | 0.56                        | 356                | 456                 | 6160                              | 0.42                        | 358     | 467                 | 6519                              | 0.45                        | 355     | 439                 | 5390                              | 0.40                        | 353               | 437                 | 5445                              | 0.51                        |
| 4h      | 358     | 469                 | 6611                              | 0.45                        | 355     | 445                 | 5697                              | 0.48                        | 354                | 458                 | 6414                              | 0.41                        | 358     | 466                 | 6474                              | 0.49                        | 355     | 448                 | 5847                              | 0.47                        | 352               | 443                 | 5836                              | 0.37                        |
| 4i      | 354     | 433                 | 5199                              | 0.00                        | 353     | ---                 | ---                               | ND                          | 355                | ---                 | ---                               | ND                          | 358     | ---                 | ---                               | ND                          | 357     | 430                 | 4755                              | 0.05                        | 348               | 435                 | 5747                              | 0.06                        |
| 4j      | 357     | 441                 | 5335                              | 0.65                        | 349     | 426                 | 5179                              | 0.62                        | 346                | 435                 | 5913                              | 0.56                        | 353     | 440                 | 5601                              | 0.57                        | 347     | 427                 | 5399                              | 0.45                        | 345               | 422                 | 5289                              | 0.51                        |
| 4k      | 351     | 435                 | 5501                              | 0.02                        | 350     | ---                 | ---                               | ND                          | 344                | ---                 | ---                               | ND                          | 355     | ---                 | ---                               | ND                          | 347     | 428                 | 5454                              | 0.09                        | 345               | 433                 | 5891                              | 0.04                        |
| 4l      | 354     | 439                 | 5469                              | 0.55                        | 353     | 429                 | 5019                              | 0.44                        | 353                | 434                 | 5287                              | 0.50                        | 355     | 437                 | 5286                              | 0.51                        | 353     | 425                 | 4799                              | 0.42                        | 353               | 422                 | 4632                              | 0.52                        |
| 4m      | 347     | 440                 | 6091                              | 0.38                        | 352     | 424                 | 4824                              | 0.29                        | 344                | 435                 | 6085                              | 0.46                        | 351     | 441                 | 5814                              | 0.42                        | 355     | 427                 | 4750                              | 0.28                        | 345               | 420                 | 5176                              | 0.33                        |
| 4n      | 351     | 428                 | 5125                              | 0.31                        | 351     | 418                 | 4566                              | 0.15                        | 346                | 420                 | 5092                              | 0.23                        | 351     | 429                 | 5180                              | 0.32                        | 350     | 415                 | 4475                              | 0.19                        | 345               | 410                 | 4595                              | 0.13                        |
| 4o      | 358     | 444                 | 5410                              | 0.09                        | 360     | 423                 | 4137                              | 0.29                        | 358                | 426                 | 4459                              | 0.36                        | 360     | 443                 | 5204                              | 0.17                        | 358     | 425                 | 4403                              | 0.09                        | 358               | 430                 | 4677                              | 0.07                        |
| 4p      | 351     | 424                 | 4905                              | 0.20                        | 344     | 408                 | 4560                              | 0.24                        | 342                | 415                 | 5143                              | 0.35                        | 345     | 422                 | 5289                              | 0.44                        | 349     | 405                 | 3962                              | 0.18                        | 340               | 409                 | 4962                              | 0.21                        |
| 4q      | 359     | 489                 | 7405                              | 0.16                        | 358     | 463                 | 6334                              | 0.16                        | 355                | 487                 | 7635                              | 0.16                        | 362     | 494                 | 7381                              | 0.09                        | 355     | 427                 | 4750                              | 0.21                        | 364               | 431                 | 4270                              | 0.17                        |
| 4r      | 359     | 484                 | 7194                              | 0.27                        | 359     | 446                 | 5434                              | 0.35                        | 356                | 466                 | 6631                              | 0.32                        | 364     | 472                 | 6286                              | 0.41                        | 353     | 459                 | 6542                              | 0.38                        | 354               | 451                 | 6075                              | 0.36                        |
| 4s      | 384     | 576                 | 8680                              | 0.04                        | 387     | 516                 | 6460                              | 0.10                        | 378                | 414                 | 2300                              | 0.17                        | 378     | 550                 | 8273                              | 0.05                        | 384     | 528                 | 7102                              | 0.16                        | 352               | 546                 | 10094                             | 0.21                        |
| 5e      | 380     | 456                 | 4386                              | 0.02                        | 375     | 440                 | 3939                              | 0.03                        | 378                | 449                 | 4183                              | 0.00                        | 377     | 450                 | 4303                              | 0.01                        | 378     | 448                 | 4133                              | 0.08                        | 380               | 445                 | 3844                              | 0.13                        |
| 5h      | 381     | 435                 | 3258                              | 0.01                        | 377     | 424                 | 2940                              | 0.00                        | 377                | 450                 | 4303                              | 0.00                        | 378     | 460                 | 4716                              | 0.00                        | 376     | 430                 | 3340                              | 0.00                        | 381               | 432                 | 3098                              | 0.00                        |
| 5j      | 358     | 437                 | 5049                              | 0.05                        | 377     | 423                 | 2884                              | 0.00                        | 357                | 433                 | 4916                              | 0.07                        | 356     | 431                 | 4888                              | 0.10                        | 358     | 430                 | 4677                              | 0.04                        | 360               | 424                 | 4193                              | 0.09                        |
| 5l      | 367     | 433                 | 4153                              | 0.00                        | 365     | 426                 | 3923                              | 0.00                        | 365                | 417                 | 3416                              | 0.00                        | 365     | 429                 | 4087                              | 0.00                        | 366     | 424                 | 3737                              | 0.00                        | 369               | 420                 | 3291                              | 0.00                        |
| 5m      | 373     | 444                 | 4287                              | 0.00                        | 370     | ---                 | ---                               | ND                          | 370                | ---                 | ---                               | ND                          | 373     | 418                 | 2886                              | 0.00                        | 375     | 431                 | 3465                              | 0.00                        | 376               | 436                 | 3660                              | 0.00                        |
| 5n      | 364     | 436                 | 4537                              | 0.00                        | 364     | ---                 | ---                               | ND                          | 363                | 403                 | 2734                              | 0.00                        | 364     | ---                 | ---                               | ND                          | 365     | 408                 | 2887                              | 0.00                        | 367               | 430                 | 3992                              | 0.00                        |
| 5q      | 377     | 432                 | 3377                              | 0.00                        | 378     | 422                 | 2758                              | 0.00                        | 375                | 416                 | 2628                              | 0.01                        | 378     | 430                 | 3199                              | 0.01                        | 378     | 424                 | 2870                              | 0.00                        | 380               | 428                 | 2951                              | 0.00                        |

Quantum yield was calculated with respect to quinine sulphate dihydrate in water.

Ø<sub>f</sub> = Quantum yield

E<sub>x</sub> (λ<sup>abs</sup><sub>max</sub>) = Absorbance maxima

E<sub>m</sub> (λ<sup>em</sup><sub>max</sub>) = Fluorescence maxima

Δ $\bar{\nu}$  = Stoke's shift
